# Supplementary material for: Machine learning is an effective method to predict the 3-month prognosis of patients with acute ischemic stroke
Source: Frontiers journal article supplement (doi:10.3389/fneur.2024.1407152), 2024-06-12
Supplement: Table_1.XLS [file Table_1.XLS]

## Sheet: Trainingset +Testingset data
Target	SEX	AGE	T4	T3	FT4	FT3	TSH	MLR	PLR	NLR	PLT	HGB	RBC	MON	LYM	NEU	WBC	CRP	HCY	UA	LDLC	HDLC	TG	CHOL	GLU	FDP	DDIMER	FBG	TT	APTT	INR	PTR	PT	CHD	AF	T2MD	HBP	NIHSS	TOAST
0	1	71	67.9053	1.0973	8.325	2.8178	3.42863	7.88	75	1.54	189	129	4.28	0.32	2.52	3.89	6.58	4.8	12	211	3.79	1.34	1.74	5.95	6.76	1.27	0.6	2.97	17.1	25.2	1.08	0.91	10.7	2	1	1	2	9	5
0	0	50	78.8	0.98	10.1	2.74	1.88	0.25	64.64	1.23	117	126	4.2	0.45	1.81	2.22	4.51	1.1	17.71	377	2.2	1.03	1.62	3.87	3.45	1.16	0.38	2.91	18.2	24.7	1.07	1.07	12.5	2	2	2	2	7	5
0	1	52	67	0.89	8.91	2.35	0.999	0.14	87.62	1.46	184	153	4.99	0.3	2.1	3.06	5.64	2.272	12	286	3.03	1.5	3.23	6	15.05	1.07	0.1	3.29	16.7	26.9	0.96	0.97	11.3	1	2	1	1	6	3
0	1	76	65.5	1.2	8.28	3.21	2.2	2.42	189.66	15.16	110	152	5.04	0.24	0.58	8.79	7.62	0.9	13.5	265.99	2.3756	1.4812	1.2928	5.099	8.9341	0.8	0.2	3.41	18.8	27.8	0.96	0.97	11.6	2	1	1	2	2	1
0	1	72	58.4	0.89	8.46	2.86	5.01	0.34	157.52	2.85	178	118	3.85	0.38	1.13	3.22	4.83	2.1	18.2	342	1.58	1.5	0.7	3.4	8.26	1.6	0.68	2.4	15.8	27	1.02	1.02	11.9	2	2	2	1	7	1
0	0	79	62.7	0.82	16.31	4.33	1.89	0.24	152.67	3.63	200	138	4.34	0.31	1.31	4.75	6.53	1.3	14	298	3	1.11	2.51	5.25	5.9	2.55	0.84	3.13	17.3	29.5	0.96	0.97	11.3	1	2	2	2	16	1
0	0	76	73.1	0.93	8.04	2.65	2.45	0.31	125.38	2.29	163	150	4.98	0.4	1.3	2.98	4.91	1.6	23	350	1.84	0.99	1.09	3.65	4.18	0.3	0.28	1.91	17.3	30.6	1.11	1.11	13	2	2	2	1	3	5
0	1	64	83.02	1.2	9.04	3.07	0.913	0.26	108.72	2.98	162	153	4.99	0.39	1.49	4.44	6.67	1.5	17	407	2.37	0.83	1.69	3.97	4.43	2.19	0.47	2.86	17.9	29.8	0.92	0.92	10.8	2	2	2	1	16	1
0	0	92	70.5	0.77	8.55	2.43	2.49	0.71	340.58	7.81	235	118	3.81	0.49	0.69	5.39	6.6	40.5	15.84	273	3.8	1.3	1.09	5.6	6.14	8.31	2.7	6.14	14.5	27.6	1.05	1.05	12.3	1	1	2	1	3	2
1	1	78	67.0788	1.0421	8.465	2.6923	3.16343	2.89	230.86	9.38	187	107	3.67	0.28	0.81	7.6	6.33	9.5	22	349	5.42	1.15	1.14	7.08	6.73	6	0.94	4.73	17.9	28.6	0.95	0.94	11.2	2	2	2	2	10	3
0	0	59	83.02	1.2	9.04	3.07	0.913	0.22	165.96	3.21	234	136	4.4	0.31	1.41	4.52	6.33	1.475	12	260	2.19	0.93	1.85	3.96	6.55	2.94	0.77	3.45	16.8	28.3	0.97	0.97	11.4	2	2	2	1	5	5
0	1	91	65.9	0.79	8.6	2.19	1.49	0.37	148.8	1.94	186	127	4.14	0.46	1.25	2.43	4.38	2.476	22.51	377	2.4128	1.3979	1.696	5.3767	9.61	3.74	1.27	1.88	19.1	22.9	0.94	0.94	11	1	2	1	1	3	5
0	0	78	65.1326	1.069	8.0768	2.6149	3.61964	0.27	92.67	1.98	177	107	3.67	0.51	1.91	3.78	6.33	9.5	23.28	488	1.24	1.2	1.65	3.19	4.36	2.6	0.75	4.72	15.4	25.7	0.89	0.89	10.4	1	2	1	1	5	3
0	0	74	71.3	0.93	9.34	2.86	2.96	0.35	158.52	3.12	279	125	4.31	0.61	1.76	5.49	8.01	0.5	17.47	390	4.34	1.5	3.88	7.6	12.85	1.3056	0.408	2.9033	17.301	26.577	0.95	0.9502	11.096	2	2	1	1	6	1
1	0	71	69.2833	1.0219	8.8625	2.8385	3.74311	0.29	170.54	2.67	191	132	4.37	0.33	1.12	2.99	4.51	0.5	18	188	2.02	1.49	0.89	3.91	5.37	1.13	0.19	2.34	17.3	26.4	0.93	0.93	10.9	2	2	2	2	15	5
1	1	53	55.1	0.88	7.72	2.58	1.9	2.86	128.46	7.56	158	136	4.85	0.43	1.23	9.3	6.17	3.3	66	600	0.91	0.49	5.37	3.84	5.07	1.07	0.3	3.49	18.8	27.5	0.93	0.92	10.9	2	1	2	2	3	1
0	1	84	69.0318	1.0555	8.6546	2.7037	2.70105	0.59	281.71	7.8	231	140	4.37	0.48	0.82	6.4	7.92	10.5	10	216	3.08	1.65	0.93	5.15	5.33	3.39	0.81	4.3	16.5	28.6	0.92	0.92	10.8	1	2	2	1	7	3
0	1	54	82.11	1.17	8.52	2.82	1.95	0.15	77.05	1.38	225	152	5.04	0.45	2.92	4.03	7.62	0.9	12	211	3.79	1.34	1.74	5.95	6.76	1.53	0.6	2.4	16.8	28.9	0.9	0.91	10.6	2	2	1	1	1	3
1	1	51	72.2298	1.0432	8.9697	2.803	2.79681	0.36	107.26	4.42	133	163	5.09	0.45	1.24	5.48	7.36	1.4	38	482	2.1	1.29	2.47	4.51	5.56	0.53	0.18	1.55	17.6	28.7	0.92	0.92	10.8	2	2	2	1	6	5
1	0	82	52.4	0.88	7.44	2.78	2.71	0.31	209.89	4.16	191	116	3.58	0.28	0.91	3.79	5.16	0.4	56	230	2.13	1.04	1.5	3.83	5	0.53	0.32	2.48	15.8	31.3	1.03	1.03	12	2	2	2	2	8	1
0	1	52	68.7	1.29	8.59	3.13	0.89	0.23	80.83	1.49	215	144	4.51	0.61	2.66	3.97	7.35	0.4	12	268	4.06	1.38	1.82	6.28	5.11	0.27	0.19	2.44	16.9	28.6	0.89	0.9	10.5	2	2	2	2	4	3
1	1	68	88.7	1.19	9.88	3.06	3.59	0.28	255.83	3.5	307	131	4.61	0.33	1.2	4.2	5.9	0.4	13	261	4.8	1	0.92	6.22	4.43	2.94	0.99	3.71	16.6	31	0.99	0.99	11.6	2	2	2	2	2	5
0	0	71	57.1	0.89	7.33	2.57	2.74	0.19	120.9	2.73	324	133	4.73	0.52	2.68	7.32	10.65	2.8	14.56	302.87	2.6671	1.3537	1.4986	4.8969	10.8602	1.7952	0.4589	3.0051	17.624	26.499	0.9398	0.9449	11.037	1	2	1	1	1	3
0	0	77	63.9	1.12	7.73	2.32	3.3	0.22	143.11	1.39	322	120	4.18	0.5	2.25	3.13	6.07	3.7	7	188	2.6	1.23	2.35	4.98	4.39	2.67	1	2.48	16.6	27.8	0.98	0.98	11.5	2	2	1	2	6	1
0	0	85	59.5	0.89	9.45	2.69	1.74	0.34	189.06	2.59	242	115	3.72	0.44	1.28	3.31	5.13	3.176	14	239	2.58	1.24	0.98	4.27	4.2	3.81	1.02	3.67	17.5	25.8	0.97	0.97	11.4	2	2	2	1	4	5
0	1	65	65.9801	1.0512	8.118	2.7705	3.76381	5.16	81.12	1.42	159	146	5.49	0.38	1.96	2.78	6.97	0.5	12.99	197	2.1	1.7	1.81	4.62	6.09	1.87	1.14	3.54	17.1	30.4	1.08	0.87	11	1	1	1	2	4	5
0	1	91	73.2563	1.0861	9.3874	2.9749	3.90433	0.37	77.54	2.25	107	120	3.94	0.51	1.38	3.1	5.13	4.6	23.03	137	0.59	1.9	0.69	2.8	5.48	3.48	0.92	2.13	17.7	32.7	1.02	1.02	11.9	1	1	2	2	5	3
0	1	55	40.2	0.71	7.96	2.68	3.16	4.48	115.81	5.3	249	128	5.36	0.48	2.15	11.4	5.38	0.4	12	233	3.21	0.93	1.28	4.72	4.55	0.8	0.19	4.23	18	24.4	1.09	1.08	10	2	1	1	2	22	5
0	1	75	69.3289	1.0328	8.7057	2.7846	2.945	0.26	151.76	2.74	258	123	4.07	0.44	1.7	4.66	7.18	2.7	8	250	2.53	0.94	0.88	3.84	6.62	1.87	0.28	2.2	17.6	30.6	0.93	0.93	10.9	2	2	1	1	9	5
1	1	61	71.7638	1.1181	9.1042	2.6923	8.68112	0.24	97.96	2.24	192	146	5.49	0.48	1.96	4.39	6.97	0.5	7	290	2.95	1.12	1.35	5.14	4.24	14.11	9.25	1.63	17	22.8	0.88	0.88	10.3	2	2	2	1	13	1
0	1	65	66.6495	1.0671	8.2294	2.7628	3.33283	3	158.33	2.26	228	122	4.18	0.48	1.44	3.26	4.15	0.5	13.88	216	3.01	1.3	1.51	5	7.12	0.8	2.57	2.61	15.5	25.9	0.96	0.9	11.2	2	1	1	2	6	3
0	0	60	70.339	1.0792	8.5607	2.6865	2.69398	0.23	126.55	2.8	224	136	4.87	0.4	1.77	4.96	7.22	2.5	13.48	280.54	2.4629	1.3169	1.4178	4.3432	6.732	1.1	0.3	3.23	17.5	35.6	0.87	0.87	10.2	2	2	1	1	4	1
0	0	76	68.1323	1.0574	8.492	2.706	3.08624	2.85	137.09	3.75	207	153	4.66	0.53	1.51	5.67	8.05	5	23.35	297	0.77	1.4	2.04	3.1	6.47	0.53	0.27	4.11	16.5	26.7	1.04	0.95	11.9	2	2	1	2	35	3
0	1	63	68.0431	1.1042	8.5707	2.853	2.91776	0.27	88.54	2.13	170	141	4.42	0.51	1.92	4.08	6.62	1	10	361	1.44	1.39	1.98	3.73	5.38	1.32	0.2	2.3	17.1	25.5	0.86	0.86	10.1	2	2	2	1	5	3
0	0	70	4.52	6.33	15.92	4.23	2.93	0.18	77.97	1.37	223	129	4.22	0.52	2.86	3.93	7.42	0.5	12.99	279.63	2.4125	1.3698	1.6153	5.0061	7.6848	2.26	0.53	2.47	17.6	26.4	0.9	0.91	10.6	2	2	1	2	5	4
0	1	87	84.4	1.05	18.69	4.32	2.59	0.26	130.37	3.03	176	124	4.4	0.35	1.35	4.09	5.87	1	13	303	2.5	1	1.12	4.01	4.57	2.01	0.49	4.41	17.6	27.7	0.97	0.97	11.4	2	2	2	1	2	1
0	1	56	66.5	0.4	8.3	2.2	1.81	3.63	115.38	5.6	180	136	4.33	0.43	1.56	8.74	4.51	0.5	11	331	2.71	1.06	1.63	4.38	5.55	2.7818	0.24	2.66	17.3	31.9	0.95	0.961	10.7	2	1	2	1	4	3
0	1	49	82.4	1.17	8.58	2.59	2.23	0.2	126.71	2.06	204	164	5.1	0.32	1.61	3.31	5.52	2.5	11	241	2.76	1.22	1.19	4.52	4.75	0.56	0.19	2.59	17.1	26	0.89	0.89	10.4	2	2	2	1	0	5
0	0	75	60.9	0.77	6.79	2.14	1.63	0.04	217.54	0.32	248	120	4.33	0.05	1.14	0.37	1.61	51.1	20.41	336	2.94	1.2	2.78	5.4	8.08	5.73	1.31	3.62	17.4	28.7	1	1	11.7	1	2	2	1	8	4
0	1	64	5.28	1	12.91	5.35	2.92	0.21	144.52	2.29	224	150	4.89	0.32	1.55	3.55	5.5	6.9	12.12	245	2.4236	1.323	1.4703	4.4388	8.1061	1.3152	0.3794	3.0189	17.419	26.346	0.9505	0.9496	11.113	2	2	1	1	1	5
0	0	76	76	1.27	9.31	3.44	0.66	0.57	146.46	3.81	186	143	4.36	0.73	1.27	4.84	6.91	0.4	12.91	303	1.92	2	1.05	4.4	6.6	0.53	0.19	3.15	18	28.3	0.95	0.95	11.1	2	2	2	1	4	5
0	1	68	54.3	0.94	7.15	2.36	1.21	0.22	94.7	2.69	125	155	5.05	0.29	1.32	3.55	5.33	2.2	19.89	316.71	2.35	1.2	2.1	4.5	8.8489	1.07	0.24	3.9	16.2	24.2	0.97	0.97	11.4	1	2	1	1	0	1
0	0	68	65.2793	1.0702	8.1165	2.6428	3.38591	0.19	136.07	1.6	249	119	3.68	0.34	1.83	2.92	5.26	1.2	12	291	1.4	1.06	1.51	3.32	4.59	0.66	0.3	3.22	17.1	26.7	1.04	1.03	12.1	2	2	2	1	13	5
0	1	82	67.1	1.48	8.05	3.4	4.73	0.22	114.93	2.02	231	114	3.92	0.45	2.01	4.07	6.83	0.5	26	455	4.84	1.78	6.4	8.71	3.38	1.34	0.64	1.97	18.9	30.8	1	1	11.7	2	2	1	1	3	5
0	1	73	8.44	4.96	16.72	4.52	1.77	0.19	154.84	2.65	192	120	4.02	0.24	1.24	3.29	4.83	0.5	16.08	320	2.37	0.75	1.24	3.69	4.53	0.94	0.24	2.67	17.5	27.8	0.95	0.95	11.1	1	2	2	2	4	5
1	1	63	68.2071	1.0542	8.4279	2.8249	2.98646	1.49	227.87	4.7	139	122	4.02	0.41	0.61	2.87	10.02	0.5	10	220	4.92	1.64	0.64	6.85	5.31	1.88	0.24	3.15	18.1	25.9	0.95	0.92	10.4	2	1	1	2	4	1
0	1	77	53.1	0.86	7.1	2.41	5.84	0.3	159.79	4.08	155	121	4.15	0.29	0.97	3.96	5.3	2.1	22	130	1.27	1.27	0.67	2.84	10.77	0.54	0.18	2.13	17.6	26.4	1	1	11.7	1	2	1	1	1	1
0	1	46	67.2691	1.0652	8.3759	2.7551	3.1831	4.22	123.68	1.64	235	136	4.05	0.45	1.9	3.12	3.85	4.4	11.46	264.71	2.4654	1.3278	1.4507	4.3488	6.4391	0.94	0.21	3.22	16.5	29.1	0.89	0.91	13.8	2	1	1	2	3	5
0	0	86	71.6122	1.0527	8.7811	2.8113	2.92142	0.23	101.48	2.7	137	147	5.17	0.31	1.35	3.64	5.79	1.6	12	295	2.71	1.72	1.13	4.95	5.17	1.69	0.38	2.86	17.1	27.8	0.9	0.91	10.6	2	1	2	1	5	5
0	0	51	62.8	1.3	7.41	3.11	7.89	5.02	128.81	1.97	304	158	5.25	0.47	2.36	4.66	4.78	0.5	13.76	229	3.44	1.6	3.71	6.94	9.29	1.87	0.27	2.71	19.2	27.782	1.02	0.93	11.1	2	1	1	1	2	3
0	0	90	6.49	3.31	14.7	3.7	2.56	0.32	111.97	3.51	159	105	3.39	0.45	1.42	4.99	6.96	1.3	13.2	197	2.1	1.7	1.81	4.62	6.09	2.6	1.14	2.69	16.8	25.9	0.88	0.88	10.3	1	2	2	1	3	5
0	1	69	82.9	1.11	9.21	2.72	2.56	0.28	104.74	1.85	199	141	4.88	0.53	1.9	3.51	6.11	0.5	17	294	3.94	0.82	2.3	5.81	17.05	0.8	0.39	3.08	17.3	28.5	0.94	0.94	11	2	2	1	2	2	3
1	1	46	65.3464	1.0716	8.4797	2.6949	2.98166	0.24	112.62	1.92	232	144	4.79	0.49	2.06	3.96	6.96	0.5	42	285	3.19	1	2.17	5.17	6.93	0.38	0.19	2.07	16.8	25	0.84	0.85	9.9	2	2	1	1	17	1
0	0	77	7.22	1.16	14.8916	4.38	5.59	0.16	97.92	0.9	188	124	4.02	0.31	1.92	1.72	4	2.617	8	655	1.06	1.5	1.37	3.18	8.58	1.6	0.42	2.48	17.8	24.8	1.03	1.03	12	1	2	1	1	2	5
0	1	68	71.5086	1.043	8.8051	2.7467	3.15123	0.25	126.05	2.91	150	133	4.15	0.3	1.19	3.46	4.99	1.1	17.41	404	2.84	1.1	1.4	4.58	7.69	1.7	0.54	2.11	18.9	26.4	0.84	0.84	9.8	2	2	2	1	4	3
0	0	59	71.55	1.26	17.91	4.25	0.17	0.25	235.88	5.29	309	137	4.7	0.33	1.31	6.93	8.64	0.5	12.89	185	2.78	1.7	1.64	5.23	10.57	0.9	0.33	2.41	18.6	22.2	0.83	0.84	9.8	1	2	2	2	4	1
0	1	79	47.8	0.89	7.38	2.45	1.36	0.21	80.86	2.36	169	120	3.97	0.43	2.09	4.93	7.58	2	16	293.71	1.9	0.99	1.12	3.4	6.72	0.53	0.22	2.09	17.1	27.2	1.09	1.09	12.7	2	2	1	1	2	5
0	0	95	53.1	0.96	9.05	3.02	3.16	0.49	144.83	3.28	168	124	3.65	0.57	1.16	3.8	6.03	4.8	15.07	375	1.67	1.3	1.67	3	7.82	0.8	0.31	2.9	16.9	28.3	1.11	1.1	12.9	1	2	2	1	5	4
0	0	64	74.9	1.08	8.59	2.89	4.86	0.16	151.69	3.38	179	122	4.26	0.19	1.18	3.99	5.42	15.6	6	214	3.62	1.08	0.65	4.99	7.03	0.27	0.19	3.08	17	25.8	0.96	0.97	11.3	2	2	1	1	6	3
1	1	54	68.7636	1.0861	8.6619	2.6698	3.36214	0.26	131.72	3.02	245	153	4.66	0.49	1.86	5.61	8.05	5	15.08	260	4.36	1.6	1.62	6.7	17.6	1.87	0.26	3.71	16.3	29.2	0.95	0.95	11.1	2	2	2	1	14	3
1	1	52	96.8	0.97	11.19	2.59	11	5.5	92.42	2.76	183	157	5.13	0.36	1.98	5.47	7.17	0.5	21.89	403	2.16	0.93	1.06	3.57	5.63	1.87	0.22	3.58	17.6	27.9	1.17	0.9	11	1	1	2	2	3	1
1	0	87	79.8	1.13	8.37	2.88	6.39	0.19	62.76	2.14	91	108	3.64	0.28	1.45	3.11	5.04	0.3	31	591	1.33	0.94	0.97	2.78	5.33	6.16	1.36	1.97	19.7	28.7	1.04	1.03	12.1	1	1	1	1	1	5
1	1	82	87.11	1.14	9.11	2.67	1.5	0.31	220	7.53	187	146	4.92	0.26	0.85	6.4	7.79	3.829	20	240	4.31	1.15	1.62	6.2	12.44	8.53	2.18	3.08	16.9	27.3	0.94	0.94	11	2	2	1	2	3	1
0	1	77	55.1	0.88	7.72	2.58	1.9	0.19	145.33	1.39	218	116	3.82	0.28	1.5	2.09	4.01	0.5	7	294	3.06	1.05	1.9	4.97	5.33	2.67	0.67	2.58	16.8	24.7	0.96	0.97	11.3	2	2	2	1	3	5
1	1	89	89.6	0.79	9.49	2.03	2.41	0.37	124.44	3.98	112	94	3.08	0.33	0.9	3.58	4.99	40.1	17.88	51	2.3956	1.4577	1.2415	5.1375	5.61	2.7568	0.6613	4.2574	17.907	27.487	0.9511	0.9357	11.03	1	2	2	1	7	5
0	1	70	71.4838	1.1033	8.754	3.0144	2.43563	0.33	101.1	2.47	183	152	4.79	0.59	1.81	4.47	7	1.41	10	255	2.28	1.31	1.19	4.13	6.15	1.1	0.34	2.96	17.7	27.2	0.94	0.94	11	2	2	1	1	14	5
0	0	73	47.8	0.89	7.38	2.45	1.36	4.8	70.51	1.29	220	141	4.41	0.65	3.12	4.04	5.13	0.5	14.34	303.21	3.51	1.3	1.73	5.6	5.8009	1.6	0.18	3.57	16.6	29.7	0.92	1.04	1.2	2	1	1	1	4	3
0	1	91	46.4	0.82	7.11	2.39	3.57	0.37	148.8	1.94	186	127	4.14	0.46	1.25	2.43	4.38	2.383	21.22	377	2.4488	1.4106	1.7864	4.9779	9.61	3.74	1.27	1.88	19.1	22.9	0.94	0.94	11	1	2	1	1	3	5
0	1	54	89.6	0.79	9.49	2.03	2.41	4.03	143.95	2.32	226	161	5.55	0.39	1.57	3.64	6.64	1.5	28.71	362.72	2.35	1.2	2.1	4.5	6.0996	0.8	0.24	3.71	17.6	27.9	1.08	0.93	9.8	1	1	2	1	1	2
0	0	69	68.4063	1.0734	8.3973	2.7082	3.27101	5.05	66.18	1.69	137	132	4.4	0.41	2.07	3.49	4.96	2.683	16.39	325	2.8	1.16	1.07	4.45	4.05	1.07	0.63	3.67	16.3	28.9	0.88	0.86	12.2	2	1	1	2	5	5
0	0	81	84.1	0.9	9.18	2.36	2.13	0.36	84.02	2.11	163	148	4.82	0.7	1.94	4.1	6.94	2.373	16.79	296.85	1.98	1.1	0.92	3.5	4.9014	0.8	0.42	3.45	18.2	26.8	1.04	1.03	12.1	2	2	2	1	4	1
1	1	64	69.6611	1.0983	8.6452	2.8532	3.65748	1.53	93.28	1.4	250	129	4.25	4.1	2.68	3.74	6.95	27.213	8	138	5.06	1.62	1.02	7.14	4.68	1.07	0.44	2.09	17.8	26.7	0.92	0.92	10.8	2	2	2	1	4	5
0	0	74	61.1	0.8	8.2662	2.13	3.07	0.35	158.52	3.12	279	125	4.31	0.61	1.76	5.49	8.01	0.5	17.95	390	4.34	1.5	3.88	7.6	12.85	1.5972	0.4293	2.8612	17.859	26.409	0.95	0.9506	11.081	2	2	1	1	4	1
0	1	73	77.1	1.1	9.07	2.73	2.74	4	175	5.49	196	140	4.51	0.28	1.12	6.15	5.33	5.7	12	286	3.03	1.5	3.23	6	15.05	4.01	0.1	3.37	17.8	29.1	1.03	1.16	11.7	1	1	2	2	13	3
0	1	63	81.5	1.12	8.98	2.4	2.7	0.13	95.15	1.63	216	130	4.19	0.29	2.27	3.69	6.38	1.628	22	275	1.52	0.84	1.95	3.25	5	1.87	0.44	3.22	16.9	28.1	1	1	11.7	1	2	1	1	8	5
1	1	89	59.6446	0.994	7.9633	2.7266	3.2635	0.37	124.44	3.98	112	94	3.08	0.33	0.9	3.58	4.99	40.1	16.18	51	2.3966	1.4601	1.238	5.1385	5.61	2.5274	0.4884	4.2226	18.052	27.213	0.9432	0.9339	11.05	1	2	2	1	7	5
0	1	59	71	1.05	6.84	2.53	0.948	0.16	131.02	2.11	283	122	4.27	0.35	2.16	4.55	7.16	2.9	9	274	2.73	1.12	3.02	5.22	4.25	1.07	0.29	2.53	17.2	27.6	0.94	0.94	11	2	2	2	1	4	5
1	0	77	58.1	1.11	8.0565	2.7185	6.4	3.62	186.67	5	196	104	3.57	0.29	1.05	5.25	6.11	0.7	12	206	1.7	0.9	3.25	3.79	4.75	0.66	0.19	3.67	17.5	26.4	0.93	1.03	10.5	1	1	1	2	15	1
0	1	80	64.6	0.53	7.4	2.28	5.8	0.18	57.14	1.59	180	137	4.44	0.57	3.15	5	8.83	1.5	16	360	0.82	1.02	1.07	2.46	4.7	3.74	0.74	3.45	17.6	29.8	1.12	1.12	13.1	1	2	1	1	1	5
0	1	58	70.0442	1.0209	8.9149	2.7672	3.59835	3.82	146.51	3.97	252	136	4.54	0.45	1.72	6.82	4.9	0.9	20.24	460	1.33	1.5	0.57	3.09	5.28	1.69	1.19	4.46	17.7	25	0.9497	0.91	11	2	1	1	2	4	3
1	0	82	81.5	0.83	8.7	2.26	2.82	0.37	72.2	3.17	187	147	5.02	0.97	2.59	8.2	11.86	13.8	16	285	1.91	1.15	1.39	3.69	5.64	4.01	1.62	5.39	47.1	28.9	1.17	1.16	13.6	1	1	2	1	11	2
0	1	85	71.3	1.09	8.32	3.26	1.5	0.7	535.09	6.3	305	136	4.52	0.4	0.57	3.59	4.71	2.1	13	262	2.93	1.05	1.12	4.49	6.1	1.51	0.41	2.76	17	27.4	0.95	0.95	11.1	2	2	1	2	4	1
0	1	58	48.4	0.94	9.14	2.79	2.6	0.17	83.11	1.89	187	150	4.7	0.39	2.25	4.25	6.99	2	30.8	418	0.85	1.4	6.49	5.2	7.12	0.53	0.29	2.09	18.5	26.4	0.98	0.98	11.5	2	2	1	1	7	5
0	1	58	85.9	1.42	9.86	3.65	2.06	1.43	197.27	10.64	217	144	4.81	0.77	1.1	11.7	5.35	6.566	13	261	4.8	1	0.92	6.22	4.43	0.8	0.99	2.76	15.3	24.8	0.89	0.92	11	2	1	1	2	5	3
0	0	56	72.6343	1.0316	8.8113	2.7281	2.97834	1.46	135.71	10.53	133	164	5.1	0.67	0.98	10.32	5.52	2.5	13	154	2.22	1.12	1.24	3.9	5.1	2.73	1.61	6.72	15.4	26.9	0.9	0.87	11.1	1	1	1	2	18	1
0	0	71	65.2735	1.057	8.0362	2.724	2.67836	0.48	217.24	6.3	252	133	4.46	0.56	1.16	7.31	9.06	7.4	13.43	262	4.13	1.2	1.52	6.02	7.01	1.5	0.48	4.15	17.7	26.2	0.95	0.95	11.1	2	2	1	2	5	5
0	1	79	69.9832	1.0397	8.7799	2.7452	2.71778	1.59	213.85	4.22	278	131	4.39	0.82	1.3	5.49	7.51	5.4	16.77	383	2.07	1.24	0.49	3.53	4.64	1.8122	0.45	3.85	15.8	24.4	0.88	0.8993	11.7	2	1	2	2	3	5
1	0	68	7.41	6.33	15.03	5.18	0.64	0.36	410.45	13.12	275	136	4.35	0.24	0.67	8.79	9.73	1.4	14	183	4.04	1.35	0.61	5.67	8.18	2.82	0.64	2.72	17	24.6	0.9	0.91	10.6	1	1	2	1	8	5
0	1	51	70.6	1.3	8.74	3.17	3.21	0.23	106.55	1.58	293	157	5.16	0.63	2.75	4.34	8.04	2.942	11	378	3.01	1.09	4.66	6.22	5.16	1.07	0.33	3.37	16.3	27.4	0.88	0.88	10.3	2	2	2	1	6	1
0	1	46	82.4	1.17	8.62	2.73	1.99	0.19	109.61	1.65	251	153	5.17	0.43	2.29	3.78	6.74	3.1	11.49	290.16	2.4497	1.3275	1.5418	4.3791	7.4896	1.87	0.21	2.31	17.3	27.2	0.87	0.87	10.2	2	2	1	2	5	4
0	0	69	55.1	0.88	7.72	2.58	1.9	0.2	98.27	1.86	227	139	4.41	0.47	2.31	4.3	7.21	0.6	18	271	2.18	0.88	0.72	3.39	4.3	1.13	0.19	2.55	18.8	28.9	1.02	1.02	11.9	1	2	2	1	7	3
0	1	58	67.421	1.014	8.3526	2.6567	2.57023	0.35	109.45	3.87	139	116	4.04	0.44	1.27	4.92	6.82	2	10	198	2.61	0.7	1.19	3.85	6.13	1.13	0.19	4.1	17.4	27.8	1.05	1.05	12.3	1	2	1	1	10	5
1	1	82	69.8	0.87	8.77	2.31	1.49	0.67	224.1	10.14	186	143	4.78	0.56	0.83	8.42	9.85	27.4	13.69	205	2.28	1.8	0.93	4.5	12.69	5.3	1.15	4.23	16.7	26.5	1.03	1.03	12	2	1	1	1	7	5
0	1	46	69.43	1.0539	8.6756	2.7094	2.5887	0.3	171.64	4.03	230	157	5.13	0.4	1.34	5.4	7.17	0.5	14.5	289.51	1.13	1.9	1.03	3.5	6.6236	1.6	0.61	3.37	17.7	22.1	1.02	1.02	11.9	2	2	2	2	6	5
0	1	59	133.8	0.82	25.44	4.88	0.56	0.27	85.47	3.33	147	131	4.51	0.46	1.72	5.73	8.04	0.9	14	343	1.16	0.65	2.62	2.49	6.19	0.8	0.36	2.9	18.4	32.6	1.18	1.17	13.7	2	2	1	1	12	1
0	1	49	6.83	5.09	14.64	4.06	1.44	0.2	126.71	2.06	204	164	5.1	0.32	1.61	3.31	5.52	2.5	11	241	2.76	1.22	1.19	4.52	4.75	0.56	0.19	2.59	17.1	26	0.89	0.89	10.4	2	2	2	1	3	5
0	1	65	50.1	0.97	7.69	3.03	2.44	0.26	179.82	2.24	196	132	4.19	0.28	1.09	2.44	3.94	3.2	14.4	273	1.97	1.8	0.94	4.2	9.26	1.36	0.19	2.16	17.8	28.3	0.96	0.97	11.3	2	2	1	2	2	3
0	0	56	71.3	1.09	8.32	3.26	1.5	0.18	104.76	2.23	220	152	5.27	0.38	2.1	4.68	7.43	1.5	11.74	276.28	3.51	1.3	1.73	5.6	5.437	0.8	0.18	2.27	17.8	24.6	0.89	0.89	10.4	2	2	2	1	4	3
0	0	75	58.8	0.9	8.28	2.44	2.38	0.3	153.57	3.27	172	126	4.3	0.34	1.12	3.66	5.35	1.2	13	365	2.39	1.83	1.26	5.13	5.43	2.34	0.95	2.53	16.2	30.6	1.01	1.01	11.8	2	2	2	1	6	3
0	0	59	62.05	0.82	19.87	4.21	1.538	0.16	92.56	2.21	224	138	4.67	0.38	2.42	5.36	8.35	3.7	9	395	2.74	0.83	3.19	5.02	10.81	2.73	0.44	3.07	18.1	25.9	0.87	0.87	10.2	2	2	1	1	1	1
0	1	75	67.4671	1.0421	7.7606	2.8172	2.70162	0.41	186.72	4.08	239	138	4.58	0.52	1.28	5.22	7.03	8.9	16.43	232	0.95	1.4	1.22	2.9	1.33	5.08	0.26	2.44	17.1	32	0.97	0.97	11.4	2	2	1	1	1	5
1	0	63	71.6262	1.0426	9.081	2.6867	3.47319	10.09	109.01	1.92	121	133	4.46	0.11	1.11	2.13	9.06	7.4	13	475	2.02	1.3	1.23	3.87	6.11	1.13	0.82	6.11	17.4	26.7	0.89	0.93	11.2	1	2	1	2	15	3
0	1	57	58.5	0.99	7.51	2.56	0.304	0.23	115.87	1.94	219	135	4.32	0.44	1.89	3.67	6.12	3.1	26	431	2.34	0.98	1.62	4.14	5.23	0.53	0.2	2.37	17.1	29.6	0.96	0.97	11.3	2	2	2	1	2	4
0	1	55	43.26	0.55	10.14	3.48	63.95	2.11	158.75	5.43	254	130	4.35	0.76	1.6	8.69	5.8	1.8	18	252	3.12	1.03	2.04	5.08	7.48	5.58	0.33	3.91	17.5	23.8	1.03	0.92	9.6	2	1	2	2	5	5
1	1	74	62.1315	0.9979	7.1482	2.7565	3.50667	0.9	330.61	22.55	162	121	3.77	0.44	0.49	11.05	11.98	83.5	15.81	232	2.17	1.6	0.51	4	2.37	1.34	0.25	6.14	16.1	28.1	1.11	1.1	12.9	2	2	1	1	10	5
0	1	71	68.2	1.17	8.1	3.23	2.03	0.25	94.84	2.55	239	157	5.12	0.64	2.52	6.42	9.64	2.496	13	278	3.11	1.45	1.28	5.14	5.76	3.74	0.32	2.44	19.6	33.2	1.08	1.08	12.6	1	1	2	1	7	2
1	0	67	83.4	0.72	10.2	1.32	26.6	0.25	151.2	4.54	316	136	4.76	0.52	2.09	9.48	12.16	4.2	19.27	473	2.6427	1.3461	1.6063	5.7271	11.8378	4.28	0.67	3.62	17.3	23.4	0.93	0.93	10.9	2	2	1	1	11	1
1	0	56	50.17	0.78	16.03	4.48	1.006	0.12	116.36	1.14	320	135	4.61	0.33	2.75	3.13	6.33	1.5	9	149	4.55	1.5	2.73	7.28	9.15	16.63	7.06	1.13	19.7	19.8	0.81	0.81	9.5	2	2	1	2	0	5
0	0	76	71	0.87	9.11	2.37	5.14	0.23	66.51	1.87	141	141	4.78	0.49	2.12	3.97	6.66	0.5	11.7	248	4.11	1.6	1.52	6.4	7.71	2.41	0.46	2.13	72.8	24.7	0.92	0.92	10.8	2	2	2	2	10	3
1	1	56	68.2	1.17	8.1	3.23	2.03	0.23	79.32	1.31	280	152	4.52	0.82	3.53	4.61	9.4	9.9	51	291	3.75	1.35	1.41	5.74	4.84	0.27	0.19	2.63	17.6	30.6	0.94	0.94	11	2	2	2	2	1	1
1	0	82	8.59	4.12	18.95	3.54	0.8	0.43	127.78	6.37	184	81	2.68	0.62	1.44	9.17	11.33	180.7	13	319	2.4	0.75	1.14	3.67	4.81	4.7	1.72	8.23	16.5	27.5	1	1	11.7	1	1	2	1	8	2
1	1	73	40.2	0.71	7.96	2.68	3.16	0.19	76.62	1.86	154	141	4.5	0.39	2.01	3.74	6.4	2.698	18	486	2.49	0.83	2.3	4.37	6.63	12.92	4.72	3.22	17.6	26.4	1.08	1.08	12.6	2	2	2	1	2	1
1	1	87	72.5	0.97	16.43	4.72	1.012	0.75	433.33	12.39	156	173	5.83	0.27	0.36	4.46	5.13	0.5	16	317	3.45	1.8	1.32	5.86	11.12	1.47	0.44	2.86	19	24.4	0.9	0.91	10.6	1	1	2	1	14	2
0	1	69	74.6	1.16	9.25	2.62	8.01	0.34	216.56	3.59	353	127	4.72	0.56	1.63	5.85	8.35	13.7	18	269	1.71	1.54	1.43	3.9	11.7	13.37	5.15	3.45	15.7	29.5	1.1	1.09	12.8	2	2	1	1	4	1
0	0	59	82.9	1.11	9.21	2.72	2.56	0.14	169.86	3.93	248	134	4.47	0.21	1.46	5.74	7.43	2.2	18.67	294	2.4356	1.3644	1.6947	4.8215	9.29	0	0.29	2.48	17.4	25.2	0.93	0.93	10.9	2	2	2	2	4	3
0	1	58	78.7831	1.0473	13.21	4.8	2.18	0.25	99.4	1.77	165	156	5.17	0.41	1.66	2.93	5.2	1	10	372	3.28	0.82	1.54	4.81	16.08	0.94	0.19	3.13	17.8	27.5	0.9	0.91	10.6	2	2	1	2	4	3
1	0	56	67.552	1.1289	8.376	2.7773	6.48984	0.12	116.36	1.14	320	135	4.61	0.33	2.75	3.13	6.33	1.5	9	149	4.55	1.5	2.73	7.28	9.15	16.63	7.06	1.13	19.7	19.8	0.81	0.81	9.5	2	2	1	2	0	5
0	1	72	73.2802	1.0602	9.1101	2.7142	3.14194	3.33	149.33	4.17	224	156	5.06	0.45	1.5	6.26	8.46	0.8	15.29	286	1.41	0.89	0.79	2.64	6.11	2.6	0.72	3.41	17.7	24.9	0.95	0.89	11.9	2	1	1	1	7	1
1	1	96	7.92	0.91	7.92	2.4	1.41	0.42	99.11	1.99	222	106	3.47	0.95	2.24	4.45	7.89	1	20.51	301	2.31	1.5	0.85	4.306	16.88	2.41	1.03	2.13	18.3	28	1.01	1.01	11.8	2	2	1	1	1	1
0	0	72	61.4	1.02	8.12	2.34	3.43	0.2	150.58	2.45	259	118	3.9	0.34	1.72	4.22	6.5	2.6	15	305	3.1	0.88	3.33	5.49	4.78	0.8	0.64	3.62	16.8	29.2	0.98	0.98	11.5	1	2	1	1	6	1
0	0	92	53.1	0.86	7.1	2.41	5.84	0.17	68.65	1.56	173	159	5.18	0.43	2.52	3.94	7.01	1.816	16	278	3.21	1.2	3.05	5.8	11.2	2.41	0.45	1.88	18.2	26.4	1.02	1.02	11.9	2	1	1	1	6	5
0	0	57	65.6	0.86	8.56	2.93	1.33	0.31	150.78	1.88	291	153	4.85	0.6	1.93	3.63	6.26	2.6	12.45	292.63	2.01	1.3	0.86	3.7	5.1324	1.6232	0.4074	2.8339	17.283	27.238	0.9507	0.9498	11.099	2	2	2	2	5	3
0	0	66	74.1	0.92	9.16	2.44	3.18	0.31	185.71	2.83	221	152	4.74	0.37	1.19	3.37	5.11	0.4	17	260	3.56	1.33	0.9	5.39	4.62	1.34	0.32	2.58	16.6	27.5	1.01	1.01	11.8	2	2	2	2	7	1
1	1	61	67.4413	1.0535	8.3315	2.6945	2.72965	2.49	177.78	4.44	208	148	4.89	0.47	1.17	5.2	6.96	3.897	16	196	2.25	0.87	1.05	3.6	3.72	0.76	1.74	3.38	18.3	24.9	0.93	1.01	10.7	2	1	2	2	4	3
1	1	80	51.2	1.13	7.72	3.11	7.11	0.62	212.82	7.99	166	105	3.8	0.48	0.78	6.23	7.52	5.3	20.86	460	1.33	1.5	0.57	3.09	5.28	4.2	1.19	2.65	16.7	24.9	0.99	0.99	11.6	2	2	2	2	6	5
0	1	61	67.2991	1.0233	8.4868	2.6968	2.60834	0.18	102.19	1.36	280	149	4.71	0.49	2.74	3.74	7.08	0.5	11.79	283.1	2.481	1.3954	1.3391	5.1334	6.7395	0.44	0.2	3.52	17.8	28	0.96	0.96	11.2	2	2	1	1	3	5
1	0	82	58.3	0.98	7.66	2.06	7.72	0.3	152.48	4.72	215	112	3.96	0.43	1.41	6.66	8.63	9.5	20.22	351	1.49	1.3	1.35	3.4	7.1	40.55	15.3	3.29	15.1	26.8	1	1	11.7	2	2	2	2	10	3
1	1	71	88.7	1.19	9.88	3.06	3.59	0.6	375.47	14.43	199	164	5.36	0.32	0.53	7.65	8.52	1	11	219	4.38	1.29	1.03	6.14	8.33	1.88	0.42	3.52	17.3	23.8	0.92	0.92	10.8	2	2	2	1	1	5
1	0	87	70.8166	1.0357	8.7106	2.6911	2.83379	1.33	335	13.85	134	130	4.34	0.53	0.4	5.54	6.48	16.6	17.16	262	4.94	1.1	1.13	6.55	8.13	4.2	0.7	3.42	15.3	31.4	1.08	1.08	12.6	2	2	2	2	18	5
0	0	95	96.2	1	9.85	2.75	2.7	0.49	144.83	3.28	168	124	3.65	0.57	1.16	3.8	6.03	4.8	17.74	375	1.67	1.3	1.67	3	7.82	0.8	0.31	2.9	16.9	28.3	1.11	1.1	12.9	1	2	2	1	3	4
1	1	67	68.2522	1.0818	8.4097	2.6946	2.95273	0.44	285.19	5.3	308	136	4.52	0.48	1.08	5.72	7.61	13.8	15	334	2.85	1.36	3.7	5.27	21.61	1.6	0.33	4.48	17.7	25.9	0.88	0.88	10.3	2	2	1	1	9	5
1	1	60	101.5	1.07	16.12	4.64	1.408	1.08	288.46	23.08	150	150	4.55	0.56	0.52	12	13.11	0.5	15	234	2.05	1.32	1.26	3.88	4.85	0.92	0.34	2.34	18.3	23.1	0.96	0.96	11.2	2	2	2	2	22	2
0	0	78	7.5	1.04	14.2678	4.73	4.01	0.29	164.58	3.31	158	132	4.03	0.28	0.96	3.18	4.49	5	5	276.02	2.4589	1.3926	1.3561	5.1326	5.23	1.6	0.25	2.68	19.3	36.1	2.23	2.18	25.5	1	1	2	1	2	5
1	1	56	53.9	1.12	7.55	3.16	1.94	0.23	170.74	1.99	321	125	3.82	0.43	1.88	3.75	6.27	2.81	23	317	2.49	1.46	2.56	4.83	7.16	1.07	0.22	2.9	17.7	24.9	0.86	0.86	10.1	2	2	1	1	24	5
0	1	42	64.0232	1.0818	8.1408	2.7549	4.23245	0.22	113.51	2.3	210	152	5.28	0.41	1.85	4.26	7.11	0.2	17	206	2.78	0.91	1.98	4.58	6.16	1.24	0.19	1.97	17.1	30.4	0.96	0.96	11.2	2	2	1	2	4	5
1	1	77	75.6	1.24	18.2	4.46	1.333	0.31	299.22	2.28	386	118	4.05	0.4	1.29	2.94	4.64	0.9	22	349	5.42	1.15	1.14	7.08	6.73	2.91	0.94	4.9	16.3	26.7	0.95	0.95	11.1	2	2	2	2	4	3
0	0	55	40.2	0.71	7.96	2.68	3.16	0.45	139.18	4.11	135	120	4.13	0.44	0.97	3.99	5.45	3.4	11.85	276.56	2.4452	1.3279	1.3356	4.3624	7.133	1.7	0.25	2.61	16.9	25.1	0.98	0.98	11.5	2	1	1	1	5	4
1	1	57	63.5	0.91	8.2	2.33	1.75	0.22	114.43	3.22	230	163	4.5	0.44	2.01	6.47	9.01	1.5	82	442	1.97	1.17	3.19	4.59	4.9	0.8	0.23	2.27	18.1	26.8	0.9	0.91	10.6	2	2	2	1	1	1
0	1	63	73.4	1.39	9.88	2.86	5.22	10.67	65.1	1.29	125	138	4.98	0.18	1.92	2.47	5.68	4.475	13	348	1.59	1.8	0.91	3.8	8.84	1.6	4.41	3.54	17.8	26.4	1.08	1.02	10.4	2	1	1	2	5	1
0	1	85	64.4	1.12	8.89	2.81	2.54	0.18	88.83	1.3	175	133	4.16	0.36	1.97	2.56	5.27	0.6	13	343	1.55	1.23	1.38	3.64	4.41	1.34	0.19	1.66	18.4	29.9	0.96	0.97	11.3	2	2	2	1	6	5
0	1	73	73.4	0.66	9.9	2.25	1.93	0.36	217.54	3.09	248	135	4.59	0.41	1.14	3.52	5.23	14.8	16.12	312.9	2.5001	1.3072	1.1334	4.3285	5.8871	3.21	1.12	3.71	17.2	34.5	1.08	1.08	12.6	2	2	2	1	8	1
1	1	58	68.153	1.0795	8.3231	2.7013	2.9347	4.56	88.13	2.39	193	150	5.33	0.48	2.19	5.24	6.33	1	15	278	2.67	0.74	1.44	4.01	5.93	0.5	1.01	3.58	18.5	27.2	0.9	0.97	9.3	2	1	2	1	4	5
0	0	22	85.9	1.42	9.86	3.65	2.06	0.29	135.37	2.98	222	145	4.67	0.47	1.64	4.89	7.45	1.648	12.97	281.88	2.4228	1.3208	1.2297	4.4142	5.446	1.1354	0.3619	2.8805	17.592	26.791	0.9516	0.9492	11.101	2	2	2	2	8	5
1	0	80	67.7614	1.0573	8.9074	2.7707	3.37522	0.54	227.85	15.67	180	148	4.93	0.43	0.79	12.38	13.62	0.9	18.39	378	3.51	1.4	1.45	5.57	8.82	10.4	4.44	2.2	15.9	20.2	0.91	0.91	10.6	2	1	2	1	2	2
0	1	84	69.0318	1.0555	8.6546	2.7037	2.70105	0.59	281.71	7.8	231	140	4.37	0.48	0.82	6.4	7.92	10.5	10	216	3.08	1.65	0.93	5.15	5.33	3.39	0.81	4.3	16.5	28.6	0.92	0.92	10.8	1	2	2	1	7	3
0	0	85	81.5	1.12	8.98	2.4	2.7	0.09	141.06	3.52	213	148	4.89	0.13	1.51	5.32	6.96	2.708	13	475	2.02	1.3	1.23	3.87	6.11	3.09	0.82	3.59	17.7	23.7	0.9	0.91	10.6	1	1	2	2	8	2
0	1	88	82.1	1.02	9.97	2.79	2.51	0.31	54.73	2.08	133	129	4.19	0.76	2.43	5.05	8.49	5.2	31.27	508	0.48	1.8	1.37	2.9	5.71	4.28	1.01	3.22	20.6	36.5	1.21	1.21	14.1	1	1	2	2	13	2
0	0	59	67.167	1.0576	8.4768	2.7481	3.24195	5.85	86.25	3.03	207	126	4.23	0.41	2.4	7.27	5.61	1.2	15	260	2.39	1.19	1.22	4.14	5.28	1.13	0.28	3.58	17.2	25.5	0.96	1.01	13.2	2	2	1	2	5	5
0	1	82	54.7	0.96	8.34	3	15.9	0.17	148.94	1.35	210	149	4.81	0.24	1.41	1.9	3.66	2.282	8	235	2.61	1.75	1.59	5.52	12.94	1.07	0.31	2.31	18	27.1	0.94	0.94	11	1	2	1	1	7	4
0	1	85	58.9	0.89	8.94	2.32	2.31	0.3	191.8	3.19	234	155	4.87	0.36	1.22	3.89	5.67	0.9	9	251	4.93	1.23	1.38	6.79	7.88	1.6	0.34	3.9	16	26.6	0.9	0.91	10.6	1	2	1	1	5	5
0	1	63	55.9	1.03	8.38	2.75	2.95	0.19	91.36	1.3	222	136	4.3	0.47	2.43	3.16	6.28	1	12	344	2.02	0.8	5.71	5.42	4.83	1.07	0.41	2.84	17.5	27.2	0.94	0.94	11	2	2	2	1	4	3
1	1	43	9.87	1.93	13.36	7.05	0.007	0.35	94.9	2.04	242	139	4.82	0.88	2.55	5.21	8.9	0.4	10	292	5.54	0.62	1.16	6.69	5.18	0.8	0.18	2.13	17.6	26	1.03	1.03	12	1	2	2	1	9	5
0	1	50	76.3035	1.2399	9.3369	2.7694	3.16116	0.27	119.23	3.03	217	174	5.31	0.5	1.82	5.52	7.97	1.7	14.8	351	2.76	1.2	1.62	4.7	7.69	0.53	0.19	2.09	17.5	26.3	0.86	0.86	10.1	2	2	2	1	12	4
1	1	86	66.5	0.99	7.69	2.57	7.71	0.56	284.44	4.08	256	130	4.24	0.5	0.9	3.67	5.68	7.3	22	236	3.57	1.01	1.38	5.21	6.23	4.55	1.46	4.01	17.2	29.2	0.97	0.97	11.4	1	2	1	1	2	1
1	0	56	76.9	1.36	8.54	2.99	1.41	0.24	102.75	6.35	112	116	3.69	0.26	1.09	6.92	8.29	3.213	7	237	2.45	1.28	3.08	5.13	13.19	2.07	1.92	1.91	17.9	22.8	0.86	0.86	10.1	2	2	1	1	4	3
0	1	66	71.7562	1.0776	8.6166	2.7181	2.49954	0.42	151.11	3.4	204	161	4.72	0.57	1.35	4.59	6.64	2.7	15	260	2.39	1.19	1.22	4.14	5.28	0.94	0.28	3.59	17.7	25	0.89	0.89	10.4	2	2	2	1	4	5
0	0	78	55.5	1.06	8.46	2.58	2.9	0.19	89.47	1.65	255	152	5.25	0.54	2.85	4.69	8.32	1.4	17	169	3.51	1.22	1.56	5.44	3.83	1.28	0.34	3.19	17.2	23.3	0.87	0.87	10.2	2	2	2	2	3	1
0	1	56	56.6	1.09	8.47	2.69	8.6	0.2	65.82	1.52	181	145	4.65	0.56	2.75	4.18	7.64	3.4	10	331	2.36	0.94	1.79	3.75	4.01	1.34	0.46	3.29	17.6	28.8	0.89	0.89	10.4	2	2	2	1	4	5
0	1	55	77.1	1.1	9.07	2.73	2.74	0.24	116.74	2.52	265	163	5.14	0.54	2.27	5.72	8.71	1.6	26.53	485	1.82	1.1	2.38	4	7.56	0.53	0.2	2.35	133.3	36.5	1.12	1.12	13.1	1	1	2	1	2	2
0	0	69	72.0012	1.0267	9.0212	2.8006	2.43038	2.55	231.65	5.86	183	143	4.78	0.31	0.79	4.63	9.85	27.4	12	291	1.4	1.06	1.51	3.32	4.59	7.02	0.3	2.71	16.7	27.6	1.01	0.99	10.1	2	1	1	2	11	5
0	1	59	69.4	1.1	8.68	2.94	1.72	0.22	171.77	1.74	359	147	4.88	0.45	2.09	3.64	6.38	2.938	9	303	3.04	1.31	1	4.8	4.67	0.53	0.19	5.06	16.4	27.3	0.92	0.92	10.8	2	2	2	2	5	1
0	1	72	85	0.76	22.68	4.74	0.43	0.28	184.17	3.63	221	156	4.88	0.33	1.2	4.36	5.96	1.4	14.37	289.19	2.4345	1.4622	1.4508	4.9569	6.5204	0.56	0.27	1.73	19.6	26.1	0.89	0.9	10.5	1	2	2	2	4	5
0	0	69	7.52	0.37	3.38	0.94	99	0.22	95.65	2.5	176	116	3.59	0.4	1.84	4.6	7.54	3.1	27.46	499	3.36	1.2	1.62	5.3	7.69	4.01	1.27	3.02	18	33.9	1.21	1.21	14.1	1	2	1	1	12	5
0	1	84	7.19	1	15.2555	3.7	1.38	0.34	124.7	3.4	207	135	4.21	0.56	1.66	5.64	7.91	4.9	12	271	2.46	0.73	0.99	3.64	4.79	1.34	0.25	1.8	237	43	1.34	1.33	15.6	1	1	2	2	5	5
1	1	57	66.952	1.0493	8.4122	2.7161	3.44754	0.2	89.1	1.64	188	140	4.97	0.43	2.11	3.47	6.11	0.5	13	406	2.04	0.94	1.31	3.82	3.99	1.213	0.377	2.9232	17.538	27.975	0.9528	0.9499	11.1	2	2	2	1	10	5
0	0	62	70.6312	1.0616	8.7404	2.6655	3.15316	0.15	103.62	1.35	229	158	4.91	0.34	2.21	2.99	5.62	0.5	11	434	2.4	1.28	1.27	4.33	4.53	1.07	0.25	2.73	18.7	29.8	0.97	0.97	11.4	2	2	2	2	3	5
0	1	79	72.2845	1.0407	8.8219	2.6601	3.07619	2.17	130.47	4.74	167	153	4.95	0.59	1.28	6.07	9.88	2.1	17	185	2.1	1.02	1.42	3.77	14.92	2.91	1.86	3.71	18.7	26.2	0.89	0.95	10.8	1	2	2	2	17	5
0	0	67	67.6216	1.0844	8.6445	2.8321	3.75621	0.14	85.97	1.33	190	120	4.11	0.3	2.21	2.93	5.48	1.1	11.55	275.71	2.4402	1.4162	1.4264	4.9511	5.3796	1.1	0.21	2.67	19	27.1	0.87	0.87	10.2	2	2	2	1	7	3
0	1	47	75.3	1.68	9.29	3.58	4.07	0.18	92.82	2.02	194	127	4.48	0.38	2.09	4.23	6.82	1.9	12	417	1.61	0.89	1.76	3.29	4.54	0.53	0.21	1.88	18	33.6	0.98	0.98	11.5	2	2	2	2	4	1
0	1	74	66.0227	1.0562	8.2483	2.7267	2.88791	2.66	113.26	2.72	205	140	4.37	0.68	1.81	4.93	7.92	10.5	8	225	2.06	1.23	1.64	4.03	4.41	0.56	0.19	3.49	19.2	25.9	0.93	0.89	11.8	1	1	1	2	3	4
0	1	48	66.1262	1.0394	8.1911	2.7334	2.92685	2.64	142.93	4.12	283	145	4.33	0.75	1.98	8.16	5.96	2.1	13.78	295	1.99	1	1.5	3.67	5.65	1.5	0.51	4.46	18.8	29.2	0.98	0.95	11.9	1	1	1	2	5	5
0	1	54	50.5	1.19	6.96	3.03	1.41	0.17	56.86	1.29	170	146	4.8	0.5	2.99	3.85	7.75	0.4	14	541	2.77	0.93	2.23	4.71	7.98	0	0.2	1.77	18.7	26.3	0.83	0.84	9.8	1	2	1	1	2	5
0	1	69	79.4	1.38	9.58	3.37	1.89	0.55	212.2	4.29	261	130	4.4	0.68	1.23	5.28	7.35	4.217	12	263	2.7	1.06	1.5	4.44	4.27	1.34	0.61	3.8	16.6	27.6	1.04	1.03	12.1	1	2	2	2	2	3
1	1	90	88	0.96	8.47	2.7	3.33	0.43	145.76	2.29	172	117	4.01	0.51	1.18	2.7	4.65	1.2	27	372	1.26	0.63	1.62	2.63	6.5	4.52	1.25	2.34	18.7	23.9	0.95	0.95	11.1	1	2	1	1	6	5
1	1	77	70.5422	1.0282	8.825	2.8291	3.16913	0.28	230.28	2.48	251	141	4.54	0.31	1.09	2.7	4.56	2.3	13.41	282.44	2.4979	1.3022	1.088	4.2922	5.6324	1.2008	0.3902	2.8495	17.578	27.113	0.9501	0.9498	11.099	2	2	2	2	8	3
0	0	62	7.64	0.99	15.4073	5.8	2.54	0.22	70.05	1.87	138	187	6.04	0.43	1.97	3.69	6.42	4.7	7	374	4.02	0.88	1.56	5.61	6.61	1.6	0.31	1.6	17.8	31.2	0.91	0.91	10.7	1	1	2	1	4	4
1	1	59	71.9	1.23	8.55	3.28	1.12	2.61	157.45	7.98	148	147	4.91	0.36	0.94	7.5	7.85	2.8	17	313.05	0.93	0.98	0.98	2.36	6.2868	5.2581	0.18	4.71	16.6	33.5	0.98	1.0157	8.7	1	1	2	2	1	3
0	0	69	83.4	0.72	10.2	1.32	26.6	0.23	164.91	3.72	188	169	5.22	0.26	1.14	4.24	5.69	3	22.22	340.52	2.4315	1.3953	1.2838	5.1691	7.7863	2.3	0.65	3.18	16.8	23.4	0.84	0.84	9.8	2	1	2	1	5	2
0	0	22	8.21	51.4	17.49	6.29	2.46	0.29	135.37	2.98	222	145	4.67	0.47	1.64	4.89	7.45	2.1	13.37	264.14	3.8651	1.3604	1.1607	5.7992	5.4158	1.275	0.3637	2.9374	17.97	26.385	0.9499	0.9492	11.091	2	2	2	2	3	5
0	1	58	64.5641	1.1093	8.1601	2.8037	3.18602	0.23	111.98	2.73	243	134	4.5	0.5	2.17	5.93	8.72	0.5	11.46	174	4.04	1.37	1.63	6.15	5.66	1.51	0.29	2.15	19.5	21.1	0.88	0.88	10.3	2	2	2	1	4	5
0	0	63	63.3	0.92	8.77	2.48	1.19	0.26	90.7	1.92	156	124	3.91	0.44	1.72	3.31	5.52	0.5	17.26	276	1.71	1.3	0.64	3.3	5.56	2.41	0.97	1.94	16.5	28.6	0.97	0.97	11.3	2	2	2	1	4	4
0	0	88	0.65	0.61	14.769	3.68	57.5	1.5195	122.09	2.5179	207.91	159.75	5.2347	0.7385	1.7167	4.5344	6.7745	6.971	8	260	7.13	0.71	8.3	5.84	6.43	3.48	1	2.58	18.2	26.1	1.11	1.1	12.9	2	1	2	2	1	5
0	0	89	69.161	1.0376	8.6728	2.8152	5.14979	0.31	139.36	1.17	131	119	3.91	0.29	0.94	1.1	2.4	3.482	17	260	2.28	0.77	1.4	3.88	7.46	2.14	0.66	2.78	17.4	25.1	1.01	1.01	11.8	2	2	2	1	4	5
0	1	64	60.4	1.06	8.94	2.72	1.97	0.26	85.25	1.96	156	135	4.73	0.47	1.83	3.58	5.94	1.8	9	267	1.87	0.64	2.28	3.48	9.31	1.34	0.25	2.41	17.3	27.8	0.93	0.93	10.9	2	2	1	2	1	3
0	0	82	76.2	0.89	10.3	3.04	0.736	0.57	253.26	5.22	233	118	3.94	0.52	0.92	4.8	6.43	5.8	15	226	0.97	1.15	1.03	3.04	3.47	3.21	0.91	2.44	15.6	31.9	1.04	1.03	12.1	2	1	1	1	4	2
1	1	83	50.5	1.19	6.96	3.03	1.41	0.37	303.48	4.75	349	118	3.8	0.43	1.15	5.46	7.07	12.2	20.73	359	3.46	1.2	0.96	5.1	6.89	12.63	3.64	4.75	16.4	28	1	1	11.7	2	1	1	1	12	5
1	1	56	7.2558	4.261	8.4375	2.677	2.92865	1.08	198.61	8.03	286	142	4.09	1.55	1.44	11.57	14.64	89.6	14.86	295	1.99	1	1.5	3.67	5.65	4	0.51	4.28	20.5	29.4	0.93	0.93	10.9	1	2	2	1	11	5
0	0	95	96.2	1	9.85	2.75	2.7	0.49	144.83	3.28	168	124	3.65	0.57	1.16	3.8	6.03	4.8	19.24	375	0.94	1.3	1.67	3	7.82	0.8	0.31	2.9	16.9	28.3	1.11	1.1	12.9	1	2	2	1	5	5
0	0	70	63.4	1.13	2.74	2.74	8.95	0.16	87.61	1.56	191	140	4.34	0.35	2.18	3.39	5.99	2.2	11	378	2.54	1.05	3.06	4.65	4.78	2.67	0.6	2.9	17.1	28.1	0.92	0.92	10.8	2	2	2	1	6	5
0	1	65	63.2	0.79	8.01	2.21	4.56	0.21	108.81	2.37	173	107	3.45	0.33	1.59	3.77	4.83	0.4	27.05	482	0.96	1	0.96	2.4	7.75	1.07	0.28	3.35	17.8	26.6	1.09	1.09	12.9	1	2	1	1	3	3
0	0	67	46.7	0.88	7	2.39	0.65	0.23	101.05	1.98	193	131	4.3	0.44	1.91	3.78	6.39	1.2	26	468	1.8	0.85	2.75	3.55	8.07	0.8	0.45	2.9	18.2	26.1	0.96	0.97	11.3	2	2	1	1	5	5
0	1	52	89	0.82	10.9	2.77	3.24	1.75	152.9	5.88	211	142	4.62	0.79	1.38	8.12	5.19	0.4	12	390	2.31	0.87	2.33	4.24	5.98	0.8	0.23	2.89	19.2	31.8	0.88	0.89	11.7	2	1	1	2	12	3
0	0	72	53.1	0.97	8.25	2.64	1.08	0.31	127.88	1.28	211	161	5.03	0.51	1.65	2.11	4.39	1.2	12	221	3.51	1.75	1.48	5.93	9.9	3.74	0.83	2.58	17.8	26.7	1.03	1.03	12	1	2	1	1	1	3
0	1	75	45.12	0.92	13.35	5.2	2.691	0.18	111.58	2.08	212	137	4.67	0.35	1.9	3.95	6.37	0.5	11.1	266	2.25	1.2	3.12	4.87	5.72	1.7	0.43	1.8	17.6	26.6	0.82	0.83	9.7	2	2	2	2	4	3
0	1	75	69.4463	1.0475	8.747	2.7654	3.23668	0.2915	122.94	2.6077	205.87	138.93	4.5045	0.5138	1.6922	4.4751	6.9074	1.323	15	216	1.99	1.15	0.7	3.46	4.56	0.4	0.38	1.78	17.4	28	0.87	0.87	10.2	2	2	2	2	5	3
0	0	55	4.55	8.97	15.41	4.75	3.09	0.27	92.09	1.96	128	137	4.19	0.37	1.39	2.72	4.67	1.7	16	273	2.15	0.91	0.65	3.36	3.68	1.69	0.23	2.72	16.7	30.9	0.95	0.95	11.1	2	2	2	1	6	3
1	0	71	51.8	0.88	6.51	2.42	4.64	0.29	170.54	2.67	191	132	4.37	0.33	1.12	2.99	4.51	0.5	18	188	2.02	1.49	0.89	3.91	5.37	1.13	0.19	2.34	17.3	26.4	0.93	0.93	10.9	2	2	2	2	16	5
0	1	83	79.9	1.04	8.72	2.62	2.46	0.39	113.97	3.34	155	129	4.28	0.53	1.36	4.54	6.58	4.8	25.37	405	1.27	0.6	1.83	2.7	14.35	2.94	0.66	2.68	17.9	26.4	0.97	0.97	11.4	1	2	1	1	7	5
0	1	77	71.97	1.0322	8.8788	2.8245	3.73555	0.25	128.21	2.32	150	124	3.66	0.29	1.17	2.72	4.22	2.117	9	204	1.72	1.4	0.45	3.33	5.84	1.32	0.39	1.92	17.7	23.9	0.83	0.83	9.7	2	2	2	2	3	1
0	0	79	62.7	0.82	16.31	4.33	1.89	0.24	152.67	3.63	200	138	72.8	0.31	1.31	4.75	6.53	1.3	14	298	3	1.11	2.51	5.25	5.9	2.55	0.84	3.13	17.3	29.5	0.96	0.97	11.3	1	2	2	2	9	1
0	0	47	52.4	0.94	7.82	2.97	3.64	0.2889	122.875	2.5352	206.99	140.4	4.5217	0.512	1.7016	4.455	6.9285	1.386	11	334	2.94	1.22	1.98	4.83	4.91	1.0873	0.3718	2.727	17.728	27.712	0.9511	0.9502	11.099	2	2	2	1	3	1
0	1	62	84.7	1.03	9.06	2.83	5.64	0.22	133.97	2.5	209	145	4.33	0.34	1.56	3.9	5.96	2.1	11	326	2.01	1.28	0.86	3.68	6.16	0.94	0.19	2.59	17.7	25.9	0.91	0.91	10.7	2	2	2	1	2	1
0	1	77	61.4	1.21	7.61	3.15	3.22	1.86	285.26	9.46	271	125	4.26	0.51	0.95	8.99	5.69	0.9	14	201	1.68	1.15	0.74	3.47	6.94	5.3	0.31	2.99	17.007	21.8	0.95	1.03	12	2	2	1	2	11	5
0	0	77	79.3	0.96	9.13	2.63	1.58	0.12	73.86	1.45	178	152	5.23	0.3	2.41	3.5	6.46	0.6	11	251	2.19	1.01	1.4	4.1	7.85	1.34	0.42	2	18.6	27.5	0.98	0.98	11.5	2	2	1	1	2	5
1	0	81	71.8	0.87	16.02	5.23	1.95	6.27	65.25	2.34	184	124	4.06	0.45	2.82	6.6	7.31	0.5	15	133	0.94	0.85	2.26	2.82	5.96	5.41	0.36	4.31	17.1	26.5	0.96	0.93	11.2	1	1	2	2	3	1
0	1	74	60.9	1.12	14.9	4.91	1.83	0.39	178.74	2.68	227	124	63.4	0.49	1.27	3.4	5.36	3	16	196	2.25	0.87	1.05	3.6	3.72	5.41	1.74	2.44	17	24.8	0.93	0.93	10.9	2	2	1	2	5	5
0	1	79	87.4	1.31	9.72	3.49	4.39	0.23	117.47	2.19	195	137	4.5	0.39	1.66	3.63	5.74	0.4	10	330	1.93	1.27	1.14	3.96	8.01	1.6	0.44	2.63	16.7	25.8	1.04	1.03	12.1	2	2	1	1	0	3
1	0	66	67.6	1.07	8.02	3.06	2.25	0.92	395.16	9.18	245	154	4.98	0.57	0.62	5.69	6.93	3	11	359.5	0.95	1.37	5.81	4.96	7.1442	1.34	0.39	2.68	17.2	26.1	0.91	0.91	10.7	2	2	2	1	3	1
0	0	80	64.5901	1.0995	8.0458	2.7064	3.31756	0.22	127.94	2.11	261	133	4.37	0.45	2.04	4.3	7.11	2.4	9	299	3.46	1.44	2.13	6.07	3.7	1.07	0.44	3.53	17.1	25.4	1.01	1.01	11.8	2	2	2	1	5	5
0	0	53	58	0.89	7.75	2.33	1.72	0.29	119.1	2.83	237	148	4.84	0.57	1.99	5.63	8.25	1.8	13.95	183	2.4245	1.4157	1.69	5.0815	11.1781	0.8	0.18	1.94	18.1	21.9	0.85	0.85	10	2	2	1	1	2	5
1	1	71	76.6	1.1	9.76	2.9	2.53	2.65	259.02	12.02	158	145	4.9	0.23	0.61	7.33	8.61	3.2	16.08	260	4.36	1.6	1.62	6.7	17.6	2.67	0.26	2.76	18.189	25.4	1.03	0.96	11	2	1	1	2	17	5
1	1	77	67.9799	1.0473	8.4896	2.676	2.42366	0.57	190.27	5.17	215	129	4.18	0.64	1.13	5.84	7.7	88.4	12.69	262.02	2.4472	1.4001	1.1945	5.2996	7.5721	3.6	1.13	6.13	15.4	25.1	0.91	0.91	10.7	2	2	2	2	13	3
1	1	37	63.2942	1.0609	7.9285	2.7162	3.35277	3.26	123.83	4.56	291	105	3.39	0.72	2.35	10.72	6.96	1.3	11	219	4.38	1.29	1.03	6.14	8.33	2.26	0.42	3.9	17.7	23.8	0.9	1	10.6	2	1	2	1	4	1
0	1	97	59.8	0.9	7.42	2.55	2.6	0.44	120.81	1.93	209	104	3.57	0.76	1.73	3.34	6.11	0.7	14	201	1.68	1.15	0.74	3.47	6.94	2.94	0.31	1.94	17.9	28.2	0.99	0.99	11.6	2	2	1	1	4	5
1	1	67	76.3	1.08	9.58	2.83	3.02	0.5	169.05	4.74	142	140	4.51	0.42	0.84	3.98	5.33	5.7	66	600	0.91	0.49	5.37	3.84	5.07	0.8	0.3	2.73	17.3	28.1	1.08	1.08	12.6	2	2	2	2	5	3
0	1	74	8	3.53	56.3	16.83	1.76	0.31	204.17	4.6	294	133	4.25	0.45	1.44	6.63	8.57	10.2	14	129	3.8	1.87	0.94	6.1	5.52	1.69	0.36	4.2	16.7	24.6	0.82	0.82	9.6	2	2	2	1	4	3
0	0	53	73.4	1.39	9.88	2.86	5.22	0.29	119.1	2.83	237	148	4.84	0.57	1.99	5.63	8.25	1.8	10.34	183	2.4092	1.4146	1.6629	5.1194	11.0369	0.8	0.18	1.94	18.1	21.9	0.85	0.85	10	2	2	1	1	2	5
0	1	62	76.5	0.89	9.1	2.51	1.84	2.48	73.15	5.64	109	123	4.07	0.6	1.49	8.4	7.18	2.7	7	290	2.95	1.12	1.35	5.14	4.24	0.47	9.25	3.49	16.7	32.7	1.05	0.97	12.6	2	1	1	2	10	3
0	1	64	66	1.06	7.92	2.75	2.39	0.16	111.11	2.31	130	122	4.18	0.19	1.17	2.7	4.15	0.5	20	318	2.24	0.73	1.74	3.58	4.49	1.07	0.25	2.31	17.2	30.2	1.05	1.05	12.3	2	2	2	1	1	5
0	1	79	72.8713	1.0183	8.747	2.7104	3.22626	0.57	118.95	3.36	113	155	4.85	0.54	0.95	3.19	4.74	12.1	16	370	1.87	0.85	1.24	3.29	5.33	3.2	0.72	3.75	17.6	23.7	0.9	0.9	10.5	2	2	2	1	2	1
1	1	68	7.3351	22.8817	8.6332	2.796	3.06619	0.33	348.61	20.46	251	151	5.47	0.24	0.72	14.73	15.7	0.8	15.53	285	3.73	1.1	0.82	5.2	11.31	1.1	0.23	3.64	16.6	23.8	0.85	0.85	9.9	2	2	1	1	5	4
0	0	55	67.5	1.14	8.37	2.61	6.66	0.18	89.81	1.69	238	136	4.67	0.48	2.65	4.49	7.82	0.5	8	344	3.21	0.95	3.5	5.75	4.91	1.07	0.67	1.83	17.2	25.2	0.99	0.99	11.6	2	2	2	1	3	5
0	1	43	81.35	1.2	15.99	4.48	2.03	0.26	121.85	3.89	184	147	4.91	0.4	1.51	5.88	7.85	2.8	18	252	3.12	1.03	2.04	5.08	7.48	1.47	0.33	2.47	19.2	25.9	0.97	0.97	11.4	2	2	2	1	3	3
0	1	80	76.5	0.89	9.1	2.51	1.84	0.33	132.63	6.28	126	166	5.28	0.31	0.95	5.97	7.34	2.7	18.79	225	2.59	1.1	2.01	4.6	11.74	0.53	0.35	2.96	15.4	29.8	1.1	1.09	12.8	2	2	1	2	4	1
0	1	70	82.1	1.02	9.97	2.79	2.51	5.56	73.73	1.83	160	131	4.61	0.39	2.17	3.97	5.9	0.4	18.81	377	2.4104	1.3779	1.8097	4.9563	9.61	11.59	1.27	4.17	19.5	29	0.82	0.95	10.7	1	1	1	2	2	3
0	1	83	39.6	0.74	7.12	2.55	4.62	0.33	149.28	2.16	206	124	4.01	0.46	1.38	2.98	4.99	14.2	19	491	1.89	1.15	0.81	3.41	4.35	2.14	0.62	3.53	16.6	29.6	1.1	1.09	12.8	2	2	2	1	2	1
0	1	71	36.1	0.85	7.18	2.65	3.91	3.4	125.87	1.66	180	137	4.91	0.42	1.43	2.37	3.46	0.5	19.53	261	1.26	1.1	2.28	3.4	15.96	5.51	0.42	2.86	17.6	27.9	1.04	1.08	11	1	1	1	2	12	1
0	0	74	7.49	0.85	15.3641	4.49	1.1	0.33	107.63	3.09	127	163	4.92	0.39	1.18	3.65	5.34	0.4	17	324	2.63	1.06	1.4	4.33	4.55	2.41	0.51	2.23	17.8	26.1	1.04	1.03	12.1	2	2	2	1	6	5
0	0	74	72.8	0.92	8.33	2.63	2.51	0.14	120	3.14	168	145	4.78	0.2	1.4	4.39	6.07	2.435	12.95	249	2.4402	1.4121	1.9909	5.0131	34.33	2.94	0.52	2	19.8	26.8	0.92	0.92	10.8	2	2	1	1	10	1
0	0	82	66.5	0.4	8.3	2.2	1.81	0.35	104.96	3.13	127	126	4.23	0.42	1.21	3.79	5.61	1.2	15	278	2.67	0.74	1.44	4.01	5.93	2.14	1.01	2.58	16.8	28.3	1.04	1.03	12.1	2	1	1	1	4	5
1	1	79	64.4355	1.0645	8.0981	2.8927	3.43878	0.38	56.25	1.27	99	120	3.47	0.66	1.76	2.23	4.69	25.7	14.5	263.03	2.4069	1.3869	1.3147	5.6077	5.7591	0.44	0.38	4.78	15.4	26.6	0.97	0.97	11.4	2	2	2	2	5	5
0	0	78	68.3785	1.0623	8.4608	2.7095	2.7393	2.8	153.49	4.52	198	152	4.79	0.46	1.29	5.83	7	2.642	15.06	262	4.94	1.1	1.13	6.55	8.13	1.47	0.7	3.57	17.1	27	0.91	0.97	11.4	2	1	1	2	24	5
1	1	81	84.9	0.72	18.02	4.01	2.64	0.17	76.16	2.15	131	121	4.11	0.29	1.72	3.7	6.06	2.7	28	384	3.85	1.06	1.73	5.69	6.24	2.73	0.81	3.13	18.1	27.5	0.95	0.95	11.1	1	2	1	1	5	1
0	0	73	69.5	0.89	9.06	2.57	3.26	0.18	71.15	1.28	111	117	3.75	0.28	1.56	2	3.97	0.5	9	286	2.07	1.3	0.61	3.65	4.97	1.07	0.19	1.96	15.9	29.9	1.1	1.1	12.9	2	1	2	2	8	2
0	1	85	69.5227	1.0411	8.6121	2.9137	2.6705	0.7	535.09	6.3	305	136	4.52	0.4	0.57	3.59	4.71	2.1	13	262	2.93	1.05	1.12	4.49	6.1	1.51	0.41	2.76	17	27.4	0.95	0.95	11.1	2	2	1	2	4	1
0	0	89	79.5	1.05	9.53	3.07	2.42	0.37	247.17	3.32	262	126	4.36	0.39	1.06	3.52	5.14	1.2	13.27	147	2.98	2.2	1.15	5.7	6.42	1.6	0.24	2.78	17.2	28.1	1	1	11.7	2	2	2	1	5	4
1	0	70	56	1.02	8.63	2.94	2.51	4.65	185.47	3.84	319	150	4.7	0.37	1.72	6.6	6.99	2	20	318	2.24	0.73	1.74	3.58	4.49	1.87	0.25	3.15	16.8	25.5	0.99	0.95	9.2	2	1	1	2	3	1
0	1	81	88.8	1.35	9.89	2.59	2.66	0.43	218.63	5.01	352	132	4.53	0.69	1.61	8.07	10.42	5.071	11	472	1.9	0.85	1.54	3.49	4.29	2.01	0.46	3.38	18.1	30.2	0.97	0.97	11.4	1	1	2	1	4	2
0	0	76	73.5	0.74	8.25	1.94	5.62	0.2	211.11	2.86	228	127	4.12	0.22	1.08	3.09	4.42	11.6	12	138	2.64	1.13	1.32	4.37	11.14	2.41	0.75	3.71	16	25	1.02	1.02	11.9	2	2	2	2	3	5
0	1	61	69.5	0.93	9.49	2.53	5.47	0.14	64.41	1.71	190	145	4.9	0.41	2.95	5.04	8.61	3.2	9	206	1.61	0.73	1.5	3.23	9.93	0.45	0.19	2.09	17.5	29.3	1.01	1.01	11.8	2	2	1	1	5.67	3
0	1	59	62.05	0.82	19.87	4.21	1.538	3.07	163.83	5.13	231	105	3.8	0.46	1.41	7.24	7.52	5.3	12.61	276.77	2.4312	1.4975	1.2035	4.9027	16.5169	1.1	0.4991	3.36	20.5	25.7	0.94	0.97	11.9	2	1	1	1	7	3
0	1	60	68.6392	1.048	8.6085	2.72	3.15967	1.89	125	3.52	130	149	4.74	0.55	1.04	3.66	4.58	0.4	7	294	3.06	1.05	1.9	4.97	5.33	2.94	0.67	3.15	17	30.8	1	0.99	11.6	2	1	1	1	5	5
0	1	64	57	0.88	2.41	0.52	0.856	0.38	113.53	4.04	193	157	5.33	0.64	1.7	6.87	9.43	3.2	17	591	2.85	1.02	2.16	4.87	6.33	0.27	0.31	3.22	17.1	28.1	1.02	1.02	11.9	2	2	2	1	4	1
0	0	70	82.1	1.02	9.97	2.79	2.51	3.13	150.4	8.2	188	144	5.04	0.4	1.25	10.25	5.07	1.5	12	263	2.7	1.06	1.5	4.44	4.27	2.94	0.61	3.12	17.9	31	1.02	1	10.6	1	1	2	2	10	1
1	1	72	74.9341	1.0411	9.3479	2.8066	3.09503	0.37	218.6	10.1	188	153	4.95	0.32	0.86	8.69	9.88	2.1	16.64	286	1.41	0.89	0.79	2.64	6.11	2.8	0.72	2.53	17.5	25.3	0.89	0.89	10.4	2	2	2	1	22	1
0	0	78	106.8	1.34	18.15	5.01	3.004	0.28	85.14	3.21	126	145	5.01	0.42	1.48	4.75	6.71	1.4	16.39	280	1.25	1.2	1	2.9	6.63	1.34	0.8	2.63	17.3	27.2	0.96	0.96	11.2	2	2	2	1	7	3
0	1	57	5.49	6.31	19.09	4.46	0.84	0.25	88.94	1.89	209	153	4.74	0.58	2.35	4.43	7.67	0.5	13.45	303.98	2.412	1.3948	1.7473	5.218	10.2107	0.6	0.19	3.06	17.9	24.6	0.79	0.79	9.2	2	2	1	1	3	3
0	0	52	113.2	0.96	18.32	4.67	1.39	0.17	51.22	2.4	105	157	5.22	0.34	2.05	4.93	7.34	2.2	11	301	4.06	1.85	0.91	6.33	8.98	0.74	0.19	3.02	18.3	25.5	0.81	0.81	9.5	2	2	1	1	3	5
0	1	74	6.87	6.06	15.34	4.95	1.27	0.24	93.75	2.05	180	132	4.24	0.46	1.92	3.94	6.47	0.5	11	220	0.91	0.69	0.88	2	4.61	1.32	0.3	2.27	17.5	28.1	0.99	0.99	11.6	1	2	1	1	6	1
1	0	66	72.9	1.05	9.15	2.4	7.03	0.17	133.33	1.99	224	145	4.78	0.28	1.68	3.34	5.69	2	12	215	3.26	1.22	2.12	5.44	4.55	21.17	9.76	2.73	15.7	27.2	0.96	0.97	11.3	2	2	2	1	2	3
0	0	92	72.7	1.24	8.11	2.99	1.55	0.29	86.98	2.13	167	162	5.13	0.56	1.92	4.09	6.83	0.4	18	297	3.61	1.09	1.46	5.36	5.57	1.6	0.37	3.15	17.2	29	1.04	1.04	12.2	2	2	2	2	3	3
0	0	76	59.7	1.08	7.52	2.89	6.14	0.25	155.88	1.58	265	120	3.91	0.43	1.7	2.69	4.89	0.5	12.14	269.96	2.5526	1.3572	1.3435	4.758	5.5851	1.87	0.58	1.77	17	24.9	0.94	0.94	11	1	2	2	1	4	5
0	0	80	67.9964	1.1011	8.4525	2.8604	3.22552	0.25	80.29	2.28	220	137	4.57	0.69	2.74	6.24	9.83	4.4	12.83	341	2.74	1.6	2.55	5.5	5.88	3.4	0.92	2.57	18.7	26.5	0.92	0.92	10.8	1	2	2	1	9	1
1	0	49	7.3457	20.6657	8.5101	2.7717	3.24307	0.6	262.77	16.23	247	146	5.08	0.56	0.94	15.26	16.8	2.9	14.84	198	2.84	1.4	0.7	4.56	17.42	2.3	0.89	3.12	17.3	21.8	0.88	0.88	10.3	1	2	1	1	13	5
1	1	50	76.33	1.05	14.47	5.65	2.941	2.34	112.67	3.81	169	137	4.27	0.64	1.5	5.71	4.02	2.893	9	395	2.74	0.83	3.19	5.02	10.81	3.5	0.44	3.3	17.1	29.4	0.93	0.94	10.1	2	1	1	2	0	3
0	0	51	60.6	0.89	8.18	2.48	2.46	6.95	136.74	1.81	361	119	3.68	0.38	2.64	4.77	5.26	1.2	23	317	2.49	1.46	2.56	4.83	7.16	3.21	0.22	4.34	16.7	26.5	0.97	1.1	9.7	2	1	2	2	3	1
0	0	57	61.8	0.92	7.6	2.86	5.99	0.15	106.34	1.41	151	136	4.05	0.22	1.42	2	3.85	4.4	11	331	2.71	1.06	1.63	4.38	5.55	0.47	0.24	2	16.7	30.3	0.97	0.97	11.4	2	2	2	2	4	5
1	0	69	96.8	0.97	11.19	2.59	11	0.12	100.64	1.56	315	109	3.59	0.36	3.13	4.88	8.5	2.246	12	240	6.51	1.71	1.41	8.86	7.04	2.14	1.34	3.29	17.4	28.9	0.93	0.93	10.9	2	2	1	1	5	1
1	0	82	66.5	0.94	13.22	3.59	1.186	0.19	144.81	2.56	265	111	3.51	0.35	1.83	4.68	6.93	3.4	40	403	1.08	1.13	0.92	2.63	3.74	2.73	1.07	3.25	16.2	27.9	1.04	1.03	12.1	1	2	1	1	18	3
0	1	78	67.666	1.0595	8.5823	2.7814	3.54624	0.21	89.57	2.25	146	110	3.62	0.35	1.63	3.66	5.74	1.884	13	295	1.59	1.03	1.17	3.15	4.7	2.26	0.4	2.96	16.9	26.9	1	1	11.7	1	2	2	1	2	5
0	1	46	106.8	1.34	18.15	5.01	3.004	4.41	53.53	2.56	144	135	4.21	0.61	2.69	6.88	7.91	4.9	9	165	1.64	1.09	0.75	3.38	7.42	0.53	0.19	3.57	19.2	36.1	1.01	0.98	9.9	2	1	1	1	11	5
0	1	50	70.6	1.3	8.74	3.17	3.21	0.18	91.58	2.06	185	158	6.08	0.37	2.02	4.17	6.67	2.604	16	451	2.51	0.73	2.08	4.19	5.1	0	0.19	2.44	17.7	28.6	0.9	0.91	10.6	2	2	2	1	16	3
0	1	52	79.1	0.6	10.2	2.06	1.83	3.39	128.06	4.33	178	119	3.65	0.41	1.39	6.02	7.02	3.2	10	296	2	1.16	1.48	4.16	7.41	0.53	0.35	2.59	17.7	30.6	0.937	0.93	10	2	1	1	2	4	1
0	0	69	61.4	1.02	8.12	2.34	3.43	0.2	63.92	1.71	124	139	4.5	0.38	1.94	3.31	5.73	0.5	12	286	2.19	0.89	1.55	3.79	4.53	1.1	0.25	3.02	18	29.4	0.96	0.97	11.3	2	2	2	2	5	3
0	1	81	69.0084	1.0632	8.7358	2.7722	2.35523	0.11	149.59	5.87	181	156	5.06	0.13	1.21	7.1	8.46	0.8	13.09	331	2.84	1.5	1.01	4.8	7.69	0.9	0.29	2.73	19.2	26.3	0.91	0.91	10.7	2	2	2	1	7	1
1	0	72	47.8	0.89	7.38	2.45	1.36	0.54	85.06	6.32	131	138	4.6	0.83	1.54	9.74	12.47	4.7	16	316	2.85	1.18	2.78	5.29	9.98	1.69	0.8	4.2	17.6	26.7	0.85	0.85	10	2	1	1	1	4	1
0	0	65	73.2	1.16	9.38	2.84	5.42	0.22	107.19	1.82	179	123	3.78	0.37	1.67	3.04	5.2	2	14	304	1.68	1.37	1.57	3.49	6.06	1.07	0.55	2.63	17.2	27.2	0.94	0.94	11	2	2	1	1	4	3
0	0	89	23.9	0.75	3.96	2	10	0.4	153.74	3.3	226	149	4.6	0.59	1.47	4.85	7.07	8.78	22.04	249	3.31	1.3	1.3	5.2	7.17	1.6	0.35	3.08	238	44.3	1.27	1.26	14.7	1	1	2	2	9	4
1	0	87	88.7	1.19	9.88	3.06	3.59	1.99	141.03	2.52	275	163	5.09	0.98	1.95	4.91	7.36	1.4	8	138	5.06	1.62	1.02	7.14	4.68	1.07	0.44	3.61	17	26.6	1.04	0.92	10.7	2	1	1	2	4	1
0	0	57	71.9	0.81	9.97	2.1	2.17	0.31	150.78	1.88	291	153	4.85	0.6	1.93	3.63	6.26	2.6	17.59	329.67	2.01	1.3	0.86	3.7	5.158	1.7998	0.4442	2.9222	17.239	27.307	0.9507	0.9502	11.075	2	2	2	2	5	3
0	0	68	53.1	0.96	9.05	3.02	3.16	6.59	96.13	2.37	323	124	63.4	0.51	3.36	7.96	5.36	3	18	297	3.61	1.09	1.46	5.36	5.57	0.54	0.37	5.35	18.1	27.434	0.89	1	10.6	2	1	2	2	1	1
0	1	75	68.0844	1.0344	8.2942	2.7701	2.95871	2.56	150	10.96	150	125	4.18	0.39	1	10.96	4.85	5.4	11	245	2.4125	1.3609	1.1693	5.5615	6.2979	0.8	0.3793	3.49	16.3	28.4	0.93	0.99	10.4	2	1	1	1	3	1
1	0	78	69.7	0.96	17.22	4.42	3.355	2.26	107.78	1.81	180	164	5.36	0.74	1.67	3.03	8.52	1	17.4	91	1.34	0.8	1.71	2.92	11.93	2.7	0.89	3.05	18.329	26.2	0.92	0.91	11.9	2	2	1	2	10	3
0	0	59	81.3	1.02	16.56	4.7	2.397	0.16	134.86	2.71	294	155	5.4	0.35	2.18	5.91	8.5	2.7	13	288	3.62	2.07	0.97	6.13	8.88	1.1	0.2	2.51	18.7	23.5	0.86	0.86	10.1	2	2	1	1	2	3
0	1	68	82.1	1.02	9.97	2.79	2.51	0.22	94.7	2.69	125	155	5.05	0.29	1.32	3.55	5.33	2.2	17.96	315.49	2.35	1.2	2.1	4.5	8.3529	1.07	0.24	3.9	16.2	24.2	0.97	0.97	11.4	1	2	1	1	0	1
0	1	71	81.5	0.87	9.71	2.75	2.26	0.15	96.91	1.57	157	153	4.77	0.25	1.62	2.54	4.57	1.419	11	244	2.68	1.8	0.92	4.9	5.32	2.41	0.52	2.31	18.7	31.2	0.99	0.99	11.6	1	2	2	2	1	4
0	1	75	108.25	0.92	21.34	5.73	2.708	0.2832	122.645	2.5882	202.25	159.1	5.236	0.4999	1.6935	4.5004	6.8749	1.853	15	211	2.82	1.03	0.91	4.27	5.41	1.8242	0.4252	2.9124	17.586	27.847	0.9625	0.9486	11.11	2	2	2	2	2	3
0	1	76	88	0.96	8.47	2.7	3.33	3.8	58.85	3.32	123	124	4.23	0.55	2.09	6.93	5.25	0.4	10	249	2.48	1	1.05	3.96	5.33	7.67	0.18	2.48	15.9	31.4	0.9501	0.99	11.2	2	1	1	2	2	1
0	1	49	67.4071	1.0737	8.2657	2.809	3.55062	4.74	86.43	1.63	172	130	4.14	0.42	1.99	3.24	8.63	0.5	10	253	3.03	1.54	0.86	4.96	5.83	0.7	0.57	2.77	17.3	27.2	0.92	0.85	9.7	2	1	2	2	7	1
0	1	53	110.46	0.68	24.77	4.78	0.001	0.3	95.68	1.98	177	171	5.75	0.55	1.85	3.66	6.29	0.5	21	281	2.13	0.79	2.03	3.81	10.72	0.53	0.2	1.66	18	29.6	1.01	1.01	11.8	2	2	1	1	2	1
1	1	57	96.23	0.6	18.48	3.5	3.226	2.36	69.26	4.58	178	147	5.17	1.09	2.57	11.77	5.79	1.6	12	286	2.19	0.89	1.55	3.79	4.53	5.91	0.25	5.18	17.7	26.5	0.93	0.93	11.5	2	1	2	2	13	1
0	0	61	78.9	1.23	13.86	4.99	2.762	0.21	97.5	2.18	195	151	4.81	0.42	2	4.36	6.88	0.7	10.27	234	2.35	1.2	1.74	4.34	6.37	0.7	0.42	2.2	17.7	26.8	0.82	0.82	9.6	1	2	1	1	2	3
0	1	55	69.4	1.1	8.68	2.94	1.72	0.24	116.74	2.52	265	163	5.14	0.54	2.27	5.72	8.71	1.6	25.11	485	1.82	1.1	2.38	4	7.56	0.53	0.2	2.35	133.3	36.5	1.12	1.12	13.1	1	1	2	1	2	2
1	0	69	65.9	0.79	8.6	2.19	1.49	0.56	225.51	6	221	132	4.35	0.55	0.98	5.88	7.54	4.9	12.61	268.45	3.04	1.55	0.9	5	19.2	4.81	1.7	3.02	17.2	23.2	0.93	0.93	10.9	2	2	1	2	7	3
0	0	60	64.5	0.95	7.89	2.53	2.06	0.23	126.55	2.8	224	136	4.87	0.4	1.77	4.96	7.22	2.5	16.11	323.96	2.4588	1.3024	1.6405	4.3403	7.1601	1.1	0.3	3.23	17.5	35.6	0.87	0.87	10.2	2	2	1	1	9	1
1	1	71	39.6	0.74	7.12	2.55	4.62	0.29	182.35	2.66	434	120	4.3	0.7	2.38	6.32	10.03	1.5	14.84	198	2.12	1.3	1.49	4.1	18.42	1.87	0.43	2.03	17	26.4	0.89	0.9	10.5	2	2	1	2	1	1
0	1	54	8.52	7.6	15.61	3.63	0.99	0.54	190.53	8.31	181	157	4.94	0.51	0.95	7.89	9.4	1.1	14.63	189	2.14	0.87	1.25	3.58	5.72	1.3	0.32	1.73	21.7	27.3	0.86	0.86	10.1	2	2	2	1	10	1
0	0	85	5.29	0.85	15.3885	4.08	4.18	0.32	282.72	9.94	229	121	4.25	0.26	0.81	8.05	9.39	8.4	14.35	268.23	3.24	2.3	1.46	6.21	7.0037	2.14	0.79	3.08	18.8	24.7	1.03	1.03	12	2	2	2	2	7	3
0	0	78	71.25	0.84	19.73	5.66	5.41	0.19	89.47	1.65	255	152	5.25	0.54	2.85	4.69	8.32	1.4	17	169	3.51	1.22	1.56	5.44	3.83	1.28	0.34	3.19	17.2	23.3	0.87	0.87	10.2	2	2	2	2	9	1
1	0	56	66.7	1.07	8.53	2.8	3.48	0.24	102.75	6.35	112	116	3.69	0.26	1.09	6.92	8.29	3.14	7	237	2.45	1.28	3.08	5.13	13.19	2.07	1.92	1.91	17.9	22.8	0.86	0.86	10.1	2	2	1	1	4	3
0	0	81	55.5	0.89	8.36	3.19	3.01	0.25	137.29	2.19	243	166	5.17	0.44	1.77	3.87	6.68	1.843	15	337	2.66	1.11	1.88	4.62	3.82	1.07	0.24	2.58	17.9	32.3	1.04	1.04	12.2	1	2	2	1	3	3
1	0	65	68	0.89	13.29	4.19	1.67	0.19	261.17	3.24	269	117	4.21	0.2	1.03	3.34	4.67	8.8	14.25	267.55	2.5535	1.3702	1.2473	4.8434	6.872	4.9	1.61	2.77	16.8	24.9	0.87	0.87	10.2	1	2	2	1	12	1
0	1	57	68.8337	1.0387	8.7705	2.7392	4.2081	0.21	158.56	1.76	176	137	4.91	0.23	1.11	1.95	3.46	0.5	8	204	1.73	0.83	1.43	3.39	6.62	0.53	0.23	2.23	17.3	29.1	0.89	0.9	10.5	1	2	1	1	2	1
0	1	78	70.9304	1.0346	8.7059	2.7199	3.22708	11.33	118.63	7.26	121	133	4.37	0.09	1.02	7.41	7.11	2.4	29	285	2.07	1.25	6.29	4.8	8.89	2.94	0.2	4.53	15.8	23.8	0.91	0.99	11.3	2	2	1	2	19	1
0	1	57	60.9	1.12	14.9	4.91	1.83	6.29	39.19	0.82	212	154	4.99	0.86	5.41	4.44	6.41	3	14	305	3.07	1.43	1.21	5.05	4.88	4.2	0.19	4.05	16.7	26	0.94	1.08	10.9	2	1	1	1	2	3
0	0	85	66.5429	1.0322	8.3563	2.677	3.04923	0.34	189.06	2.59	242	115	3.72	0.44	1.28	3.31	5.13	3.048	14	239	2.58	1.24	0.98	4.27	4.2	3.81	1.02	3.67	17.5	25.8	0.97	0.97	11.4	2	2	2	1	3	5
0	1	62	66.6752	1.0551	8.2712	2.6366	3.1497	0.15	78.35	1.38	181	135	4.39	0.35	2.31	3.18	6.06	2.118	12	228	1.87	0.78	1.65	3.4	6.13	0.8	0.31	3.71	16.9	26.6	0.92	0.92	10.8	2	2	1	1	3	3
0	0	78	66.2252	1.0916	8.0424	2.6779	3.47239	0.2	74.02	2.42	188	116	3.64	0.52	2.54	6.14	9.48	1.77	16	189	3.33	0.81	4.08	5.99	8.44	2.67	0.68	2.84	17.5	26.8	0.96	0.97	11.3	1	2	1	1	1	5
0	0	53	64.7	1.02	7.97	2.53	5.87	0.15	160	1.15	304	121	4.6	0.28	1.9	2.18	4.4	0.4	7	187	2.79	1.75	1.14	5.06	5.96	1.87	0.47	3.15	18	26.4	0.94	0.94	11	2	2	2	2	8	5
0	0	83	59.9	1.25	7.58	2.99	4.89	0.21	112.66	1.39	267	118	4.05	0.5	2.37	3.29	6.61	2.9	9	139	2.83	1.42	1.37	5.44	3.98	2.94	0.95	5.39	16	28.3	0.98	0.98	11.5	2	2	2	2	5	5
0	0	74	61.1	0.8	8.9	2.13	3.07	0.35	158.52	3.12	279	125	4.31	0.61	1.76	5.49	8.01	0.5	17.61	390	4.34	1.5	3.88	7.6	12.85	0.8	0.26	2.78	17.1	25.4	0.92	0.92	10.8	2	2	1	1	4	1
1	1	61	79.5	0.92	16.41	4.42	13.216	0.24	97.96	2.24	192	146	5.49	0.48	1.96	4.39	6.97	0.5	7	290	2.95	1.12	1.35	5.14	4.24	14.11	9.25	1.63	17	22.8	0.88	0.88	10.3	2	2	2	1	15	1
0	1	58	7.26	0.82	15.2388	4.53	2.27	0.16	90.21	0.98	175	138	3.86	0.32	1.94	1.91	4.3	1.27	19	283	2.79	1.09	1.58	4.6	5.69	1.07	0.26	1.35	18.2	25.9	0.96	0.96	11.2	2	2	2	2	14	5
1	1	90	79.1862	1.0078	9.2194	2.7679	3.71152	0.43	145.76	2.29	172	117	4.01	0.51	1.18	2.7	4.65	1.2	27	372	1.26	0.63	1.62	2.63	6.5	4.52	1.25	2.34	18.7	23.9	0.95	0.95	11.1	1	2	1	1	8	5
0	1	56	56.6	1	8.7	2.63	3.72	0.37	300.83	2.27	364	155	5.05	0.45	1.21	2.75	4.59	0.5	15	300	3.5	1.88	1.37	6.11	5.57	0.6	0.19	2.68	17	32.4	0.81	0.81	9.5	2	2	2	1	4	3
0	0	75	66.0983	1.0631	8.1188	2.8039	3.43973	0.24	91.75	1.64	178	125	4.26	0.46	1.94	3.19	5.69	0.9	10.59	203	3.56	1.32	0.97	6	5.34	0.8	0.28	2.23	19.2	25.2	1.05	1.05	12.3	2	2	2	1	8	5
0	1	72	70.8664	1.0861	8.6651	2.744	3.53426	0.2	127.44	2.02	209	131	4.47	0.32	1.64	3.31	5.37	1.2	11.01	255	3.73	1.3	1.18	5.57	5.81	1.3	0.4	2.96	17.4	22.6	0.79	0.79	9.3	1	2	2	2	10	1
1	1	75	50.3	1.03	6.96	2.58	7.48	0.3	120.44	2.24	218	146	4.62	0.54	1.81	4.06	6.8	1.2	39	323	2.74	1.23	1.21	4.52	4.52	4.28	1.39	2.84	17.9	31.7	1.03	1.03	12	2	2	2	1	2	3
1	0	82	76.3	1.08	9.58	2.83	3.02	0.43	127.78	6.37	184	81	2.68	0.62	1.44	9.17	11.33	180.7	13	319	2.4	0.75	1.14	3.67	4.81	4.7	1.72	8.23	16.5	27.5	1	1	11.7	1	1	2	1	5	2
1	0	70	65.3309	1.0777	7.997	2.7291	3.17589	6.52	122.75	1.99	232	129	4.54	0.29	1.89	3.76	6.43	144.4	10	264	3.3	1.06	1.2	4.9	6.06	1.7	0.44	3.12	16.7	29.8	1.01	0.79	10.8	2	1	2	2	5	5
0	1	86	71	1.05	6.84	2.53	0.948	2.13	188.24	3.72	160	130	4.19	0.4	0.85	3.16	6.38	4.598	15.69	294	2.4101	1.3561	1.4968	4.795	9.29	4.28	0.29	3.37	16.6	26.7	0.93	1.21	10.6	2	2	1	2	16	1
0	1	58	69.1685	1.0342	8.6257	2.757	2.74304	1.84	337.04	11.05	273	125	3.82	0.44	0.81	8.95	6.27	8.057	12.3	243.06	2.5382	1.3926	1.0211	5.4369	7.7664	3.39	0.7672	4.08	18	27.9	0.87	0.92	11.9	2	1	1	2	4	3
0	1	68	46.7	0.88	7	2.39	0.65	2.4	65.1	2.56	97	149	4.81	0.62	1.49	3.81	3.66	6.334	15.49	203	3.56	1.32	0.97	6	5.34	1.34	0.28	3.49	17.6	28.2	1.16	1.1	14.6	2	2	1	1	11	5
0	0	55	67.735	1.0164	8.4399	2.7916	2.71474	0.45	139.18	4.11	135	120	4.13	0.44	0.97	3.99	5.45	3.4	11.03	256.16	2.4445	1.3213	1.2888	4.3611	6.8328	1.7	0.25	2.61	16.9	25.1	0.98	0.98	11.5	2	1	1	1	5	4
0	0	69	76.33	1.05	14.47	5.65	2.941	0.2	63.92	1.71	124	139	4.5	0.38	1.94	3.31	5.73	0.5	12	286	2.19	0.89	1.55	3.79	4.53	1.1	0.25	3.02	18	29.4	0.96	0.97	11.3	2	2	2	2	4	3
0	0	85	104.7	0.58	23.1	3.84	0.14	0.09	141.06	3.52	213	148	4.89	0.13	1.51	5.32	6.96	3.075	13	475	2.02	1.3	1.23	3.87	6.11	3.09	0.82	3.59	17.7	23.7	0.9	0.91	10.6	1	1	2	2	6	2
0	0	53	88	0.96	8.47	2.7	3.33	0.22	131.13	2.46	198	138	4.98	0.33	1.51	3.72	5.68	1.314	12	390	2.31	0.87	2.33	4.24	5.98	0.8	0.23	3.08	18.2	29.2	0.92	0.92	10.8	2	2	2	1	4	3
0	0	81	56.9	0.61	9.39	1.99	1.7	0.32	208.41	4.4	223	142	4.48	0.34	1.07	4.71	6.37	9.8	32.17	474	0.88	1.4	0.71	2.6	5.65	7.02	1.86	2.13	15.7	28.1	1.12	1.12	13.1	1	1	2	1	5	4
0	1	50	61.4	1.21	7.61	3.15	3.22	0.15	120.22	0.95	446	141	4.74	0.56	3.71	3.53	8.07	1.5	7	328	3.13	1.35	1.21	5.27	5.3	1.6	0.49	2.58	17	32.7	1.08	1.08	12.6	2	2	2	1	4	5
0	1	78	66.7	1.07	8.53	2.8	3.48	0.21	89.57	2.25	146	110	3.62	0.35	1.63	3.66	5.74	1.724	13	295	1.59	1.03	1.17	3.15	4.7	2.26	0.4	2.96	16.9	26.9	1	1	11.7	1	2	2	1	7	5
0	0	76	53.9	1.12	7.55	3.16	1.94	3.44	166.67	2.85	235	152	5.28	0.41	1.41	4.02	7.11	0.2	15.59	285	3.73	1.1	0.82	5.2	11.31	0.8	0.23	3.3	17.3	29.2	1.1	0.88	11.2	2	2	1	1	15	5
0	1	60	53.1	0.96	7.21	2.6	3.76	0.17	59.7	1.48	157	137	4.29	0.46	2.63	3.89	7.41	0.7	13	488	2.73	0.86	1.55	4.44	4.24	0.47	0.2	2.44	16.7	29.5	0.96	0.97	11.3	2	2	2	2	4	5
0	1	67	62.5	0.89	8.76	2.75	1.75	0.83	216.09	6.74	188	142	4.5	0.72	0.87	5.86	7.49	10.3	18.41	180	1.13	1.4	0.81	2.9	7.44	1.07	0.91	3.15	15	28.4	1.06	1.06	12.4	2	2	1	1	14	4
0	0	77	9.06	4.98	17.32	4.6	4.28	0.23	78.8	2.3	171	143	4.58	0.5	2.17	4.99	7.87	0.5	13.19	322	1.61	1.1	2.37	3.79	10.38	0.9	0.32	1.75	18	25	0.88	0.88	10.3	1	1	1	1	8	2
0	0	71	67.5	0.75	9.37	2.45	1.01	0.24	136.32	2.01	274	159	5.45	0.48	2.01	4.04	6.66	1.454	12.41	288.77	3.73	2.1	1.25	6.4	6.0054	0.8	0.2	2.78	17.3	27.4	0.9	0.91	10.6	2	2	2	2	2	5
0	1	73	71.3	1.09	8.32	3.26	1.5	1.25	121.18	9.13	103	172	5.26	0.68	0.85	7.76	4.75	4	10	268.66	1.77	1.24	0.55	3.26	7.128	0.53	2.15	4.42	15.9	25.9	0.99	1.09	11.9	1	1	1	1	4	3
0	0	75	75	0.95	9.98	2.82	3.05	0.23	109.25	2.6	189	144	4.52	0.39	1.73	4.49	6.74	2.4	12.19	286.88	2.4172	1.363	1.378	4.8205	7.5766	3.74	1.18	2.53	17.4	26.4	0.85	0.85	10	2	2	1	1	2	1
0	1	60	4.25	1.34	15.5386	4.39	1.16	0.18	110.81	2.05	246	157	4.77	0.41	2.22	4.55	7.77	6.2	13	189	2.54	0.48	1.38	3.65	5.06	1.07	0.19	3.29	15.8	23.2	1.04	1.03	12.1	2	2	1	1	2	5
0	1	76	65.4162	1.049	7.5808	2.7001	3.68253	0.38	144.06	6.29	206	130	4.43	0.55	1.43	9	11.04	4	11.5	188	2.4	1.4	1.33	9.67	4.6	1.87	0.85	3.08	16.2	27.2	0.98	0.98	11.5	2	2	2	1	4	4
1	1	70	71.2152	1.0434	8.7388	2.6944	3.13091	0.44	99.47	4.15	186	142	4.49	0.83	1.87	7.76	10.56	16.3	27	229	0.98	0.77	1.4	2.39	7.15	0.75	0.23	3.67	16.7	26	0.98	0.98	11.5	2	2	1	1	12	1
0	0	54	63.8	0.92	9.13	2.45	3.83	0.21	91.67	1.73	165	141	4.34	0.38	1.8	3.11	5.37	0.8	10	234	2.88	1.25	0.83	5.2	6.15	0.53	0.19	2.16	17.2	25.3	0.97	0.97	11.4	2	2	2	1	3	5
0	0	51	71.9	1.23	8.55	3.28	1.12	0.3	133.09	2.67	185	128	5.36	0.42	1.39	3.71	5.38	0.4	9	275.77	2.11	1.9	3.05	5.4	8.8817	0	0.18	1.75	17.5	25.4	0.89	0.89	10.4	2	2	2	1	3	5
0	0	84	51.5	0.85	7.13	2.51	6.4	0.25	130.97	2.23	203	133	4.36	0.38	1.55	3.45	5.47	3.4	15	125	2.16	0.97	1.79	3.74	9.31	2.67	1.01	2.53	17.4	24.8	0.9	0.91	10.6	1	2	1	1	2	5
1	1	71	67.6	1.07	8.02	3.06	2.25	0.29	182.35	2.66	434	120	4.3	0.7	2.38	6.32	10.03	1.5	14.41	198	2.12	1.3	1.49	4.1	18.42	1.87	0.43	2.03	17	26.4	0.89	0.9	10.5	2	2	1	2	1	1
0	1	75	53.6	0.93	7.21	2.85	3.17	4.13	74.06	2.24	217	110	3.36	0.71	2.93	6.55	3.38	5.1	13	406	2.04	0.94	1.31	3.82	3.99	1.24	0.8786	2.15	17.9	26.4	0.96	0.96	10.1	2	1	2	2	8	5
1	0	63	6.49	3.31	14.7	3.7	2.56	4.63	179.14	2.48	249	143	4.36	0.3	1.39	3.45	6.91	0.4	27	229	0.98	0.77	1.4	2.39	7.15	0.9	0.23	2.8	17.1	31.2	1.11	0.91	13.2	2	1	1	2	1	5
0	0	79	71	1.06	10.3	3.28	2.68	0.19	56.4	1.56	97	136	4.56	0.33	1.72	2.69	4.96	14.5	12	327	2.47	1.32	0.87	4.3	4.84	3.41	1.25	3.02	15.7	27.2	0.98	0.98	11.5	1	2	2	2	5	5
1	1	58	67	0.89	8.91	2.35	0.999	2.94	154.64	5.36	150	141	4.5	0.33	0.97	5.2	6.4	7.842	19	562	2.13	1.06	1.03	3.66	4.14	0.53	0.76	4.34	19.1	29.2	0.93	1.12	9.2	2	1	1	2	5	3
1	1	56	79.4	1.38	9.58	3.37	1.89	0.23	79.32	1.31	280	152	4.52	0.82	3.53	4.61	9.4	9.9	51	291	3.75	1.35	1.41	5.74	4.84	0.27	0.19	2.63	17.6	30.6	0.94	0.94	11	2	2	2	2	1	1
0	1	72	61.6	0.83	14.5	4.14	5.395	0.43	103.87	4.29	161	133	4.42	0.66	1.55	6.65	9.03	2.2	15	467	2.47	1	1.92	4.34	3.23	1.1	0.41	2.51	17.5	26.7	1	1	11.7	2	2	1	1	1	3
1	1	71	64.5	0.95	7.89	2.53	2.06	3.3	177.27	4.09	117	121	4.15	0.2	0.66	2.7	5.3	2.1	22	275	1.52	0.84	1.95	3.25	5	1.6	0.44	3.26	18.4	28.7	0.99	0.82	11.4	1	1	1	1	9	3
0	0	88	45.23	0.77	11.97	4.03	1.648	0.3	166.92	2.11	222	103	3.73	0.4	1.33	2.8	4.68	1.6	17	338	2.08	1.15	0.53	3.47	4.02	3.09	0.92	2.3	17.1	24.6	0.95	0.95	11.1	2	2	2	1	7	3
1	1	68	86.8	1.12	11.19	3.26	2.23	0.2	78.98	1.82	124	145	4.65	0.31	1.57	2.85	5	1	26	280	2.24	1.09	1.49	4.01	5.17	1.34	0.21	2.48	16.6	28.2	1.02	1.02	11.9	1	2	1	1	4	1
0	0	52	67	0.89	8.91	2.35	0.999	0.17	51.22	2.4	105	157	5.22	0.34	2.05	4.93	7.34	2.2	11	301	4.06	1.85	0.91	6.33	8.98	0.74	0.19	3.02	18.3	25.5	0.81	0.81	9.5	2	2	1	1	3	5
0	1	50	71.9	0.81	9.97	2.1	2.17	0.18	91.58	2.06	185	158	6.08	0.37	2.02	4.17	6.67	2.748	16	451	2.51	0.73	2.08	4.19	5.1	0	0.19	2.44	17.7	28.6	0.9	0.91	10.6	2	2	2	1	16	3
0	0	74	66.7234	1.0401	8.3773	2.7405	3.19328	0.83	278.33	9.7	167	119	3.65	0.5	0.6	5.82	7.02	3.2	15.16	267	4.7	1.5	1.76	7	6.39	7.02	1.21	3.37	16.5	25.5	0.99	0.99	11.6	2	2	2	1	2	5
0	1	42	58.1	1.11	7.9328	2.7952	6.4	0.22	113.51	2.3	210	152	5.28	0.41	1.85	4.26	7.11	0.2	17	206	2.78	0.91	1.98	4.58	6.16	1.24	0.19	1.97	17.1	30.4	0.96	0.96	11.2	2	2	1	2	10	5
0	1	54	56	1.02	8.63	2.94	2.51	0.15	77.05	1.38	225	152	5.04	0.45	2.92	4.03	7.62	0.9	12	211	3.79	1.34	1.74	5.95	6.76	1.53	0.6	2.4	16.8	28.9	0.9	0.91	10.6	2	2	1	1	5	3
0	0	74	72.6	0.89	8.05	2.55	3.08	0.21	133.68	1.72	254	133	4.05	0.4	1.9	3.27	5.67	2.9	21	519	4.09	1.3	1.95	6.69	4.5	1.87	0.79	2.84	17.6	28.6	1.02	1.02	11.9	2	2	2	1	1	5
0	0	81	66.5	0.99	7.69	2.57	7.71	0.22	288.8	3.22	361	128	4.08	0.27	1.25	4.03	5.61	1.3	16.18	294	2.61	0.8	2.26	4.44	8.7	1.9	0.76	3.23	18.6	23.6	0.89	0.89	10.4	2	1	1	1	3	5
0	0	74	66.7244	1.0428	8.3874	2.7334	3.1432	0.83	278.33	9.7	167	119	3.65	0.5	0.6	5.82	7.02	3.2	15.08	267	4.7	1.5	1.76	7	6.39	7.02	1.21	3.37	16.5	25.5	0.99	0.99	11.6	2	2	2	1	3	5
0	1	55	5.67	8.06	14.19	5.87	2.14	0.17	148.65	2.37	275	127	4.64	0.32	1.85	4.39	6.69	0.5	10	265	2.07	0.87	2.29	3.98	5.15	1.32	0.2	2.3	20.4	26.1	0.95	0.95	11.1	2	2	2	1	4	3
0	1	58	5.28	1	12.91	5.35	2.92	0.23	111.98	2.73	243	134	4.5	0.5	2.17	5.93	8.72	0.5	11.57	174	4.04	1.37	1.63	6.15	5.66	1.51	0.29	2.15	19.5	21.1	0.88	0.88	10.3	2	2	2	1	9	5
0	0	61	49.4	0.89	7.11	2.33	2.22	0.52	170.45	5.33	150	121	3.84	0.46	0.88	4.69	6.21	4.9	20	518	2.32	0.99	2.38	4.43	8.09	0.5	0.19	3.02	17.6	24.3	0.95	0.95	11.1	2	2	1	1	2	5
0	0	78	61.5391	1.0292	7.8423	2.8156	4.36105	0.14	125.84	1.62	263	104	3.46	0.3	2.09	3.38	5.88	1.9	15.9	122	2.11	1.15	0.86	3.65	4.89	1.65	0.51	2.63	21	32	1.03	1.03	12	1	2	2	1	7	1
0	1	58	12.32	2.14	20.58	7.61	0.01	0.34	137.25	2.91	140	149	4.74	0.35	1.02	2.97	4.58	0.4	23	268	2.22	1.05	1.54	3.97	5.41	0.8	0.18	1.66	18.8	23.8	0.99	0.99	11.6	1	2	2	1	0	5
0	1	53	12.32	2.14	20.58	7.61	0.01	0.34	137.25	2.91	140	149	4.74	0.35	1.75	3.36	5.62	0.5	16	318	3.28	1.28	1.7	5.22	4.82	0.53	0.21	1.97	18	25.5	1	1	11.7	2	2	2	1	6	1
0	1	83	37.6	0.78	7.95	2.2	2.57	0.34	166.21	2.28	241	121	4.01	0.49	1.45	3.3	5.67	9.428	19	562	2.13	1.06	1.03	3.66	4.14	2.94	0.76	4.01	16.5	27.4	1	1	11.7	2	2	2	1	5	1
0	1	54	83.9	1.21	9.73	3.29	1.6	0.14	141.44	1.96	314	157	4.62	0.31	2.22	4.36	7.03	1.5	6	307	1.89	1.32	0.78	3.9	4.94	0.8	0.19	2.13	16.4	26.2	0.9	0.91	10.6	1	2	2	2	17	4
0	0	80	71.9	1.23	8.55	3.28	1.12	0.38	168.84	3.91	233	131	4.39	0.53	1.38	5.4	7.51	5.4	15.34	325	2.8	1.16	1.07	4.45	4.05	1.13	0.63	2.67	18.1	25.5	1.01	1.01	11.8	2	2	2	1	5	5
1	0	86	72.7	1.24	8.11	2.99	1.55	0.36	543.18	12.7	239	122	3.77	0.16	0.44	5.59	6.2	5.7	14.44	193	1.96	1.8	0.73	4.09	5.97	10.3	2.71	3.8	18	27.8	0.91	0.91	10.6	2	2	2	2	17	1
0	0	74	65.085	1.0665	8.3823	2.7558	3.23258	0.18	78.95	1.3	180	130	4.35	0.42	2.28	2.97	5.8	1.8	8	225	2.06	1.23	1.64	4.03	4.41	0.56	0.19	1.81	19.3	25.8	0.93	0.93	10.9	1	2	2	1	12	5
0	0	76	55.9	1.03	8.38	2.75	2.95	0.57	146.46	3.81	186	143	4.36	0.73	1.27	4.84	6.91	0.4	12.51	303	1.92	2	1.05	4.4	6.6	0.53	0.19	3.15	18	28.3	0.95	0.95	11.1	2	2	2	1	5	5
0	1	62	75.601	1.038	9.2532	2.8198	4.27169	0.22	133.97	2.5	209	145	4.33	0.34	1.56	3.9	5.96	2.1	11	326	2.01	1.28	0.86	3.68	6.16	0.94	0.19	2.59	17.7	25.9	0.91	0.91	10.7	2	2	2	1	3	1
0	1	75	61.2	1.04	16.73	4.16	1.601	0.21	53.5	1.76	130	150	4.37	0.52	2.43	4.27	7.54	2.339	11	444	3.34	1.45	1.77	5.59	6.62	2.41	2.12	1.97	16	28.9	0.98	0.98	11.5	2	2	2	1	4	1
0	0	69	64.0641	0.9361	8.43	2.45	1.29	0.14	113.07	1.61	225	122	4.26	0.28	1.99	3.21	5.59	0.5	13.71	265	4.2	1.08	1.03	5.74	8.16	1.34	0.19	2.73	15.2	24.8	0.98	0.98	11.5	2	2	1	2	1	5
0	1	52	66	1.06	7.92	2.75	2.39	9.82	55.69	1.02	279	145	5.01	0.51	5.01	5.09	6.71	1.4	15.94	267	4.7	1.5	1.76	7	6.39	1.53	1.21	2.48	18.3	27.8	1.11	0.91	10.1	2	1	1	2	8	1
1	1	57	10.33	0.9	19.74	4.74	0.89	0.2	89.1	1.64	188	140	4.97	0.43	2.11	3.47	6.11	0.5	13	406	2.04	0.94	1.31	3.82	3.99	1.2837	0.3652	2.8745	17.693	27.853	0.9516	0.9519	11.101	2	2	2	1	5	5
0	1	74	59.8641	1.031	8.1492	2.7369	3.71879	0.32	231.25	3.13	259	73	2.83	0.36	1.12	3.51	5.1	3.5	16.44	383	2.07	1.24	0.49	3.53	4.64	2.07	0.45	3.83	17.1	26.5	0.94	0.94	11	2	2	2	1	5	5
1	1	62	65.9562	1.0798	8.3174	2.721	3.12935	0.22	113.33	2.72	238	149	4.93	0.47	2.1	5.72	8.56	0.5	8	218	3.29	1.06	2.1	5.3	10.39	1.51	0.19	2.34	17.1	26.6	0.91	0.91	10.7	2	2	1	1	11	5
0	0	73	63.18	0.67	17.95	4.08	3.374	0.32	164.75	2.47	201	125	4.18	0.39	1.22	3.01	4.85	5.4	13	154	2.22	1.12	1.24	3.9	5.1	5.58	1.61	3.67	16.6	26.2	0.92	0.92	10.8	1	2	2	1	8	1
0	0	56	68.5469	1.0716	8.6691	2.6712	3.57735	5.83	88.73	1.84	181	161	4.72	0.35	2.04	3.76	6.64	2.7	22.32	488	1.24	1.2	1.65	3.19	4.36	2.07	0.75	3.45	16.7	26.9	0.81	0.94	12.1	1	1	1	2	3	5
0	0	70	62.1	1.2	8.41	3.2	1.87	8.24	110.71	2.17	155	136	4.58	0.17	1.4	3.04	4.22	0.5	15	334	2.85	1.36	3.7	5.27	21.61	0.6	0.33	3.33	237	28.1	0.97	0.96	11.3	2	2	1	2	12	5
1	1	92	69.3835	1.0401	8.6254	2.8104	3.03192	0.49	156.46	4.08	230	152	5.06	0.72	1.47	6	8.3	3.7	12.23	221	2.9	2.3	0.56	5.45	5.39	2.5	0.64	2.96	16.9	28.5	0.85	0.85	9.9	2	2	2	2	10	1
0	0	69	65.0992	1.07	7.769	2.7463	5.45352	0.32	94.39	0.81	185	124	4.35	0.62	1.96	1.59	4.26	7.3	9	180	2.53	1.14	1.55	4.31	5.08	1.45	0.67	3.52	18.9	33.8	1.04	1.03	12.1	2	2	2	1	5	5
1	1	65	76.9	1.36	8.54	2.99	1.41	0.19	87.92	2.4	182	142	4.74	0.4	2.07	4.97	7.62	5.3	47	244	1.5	1.1	1.55	3.3	14.38	1.07	0.39	3.71	15.7	26.4	0.96	0.96	11.2	2	1	2	1	2	2
0	1	79	67.2	1.17	9.03	3.27	4.67	0.15	68.06	1.08	179	132	4.44	0.4	2.63	2.84	6.03	0.4	13	282	2.29	1.73	0.85	4.41	4.16	3.74	0.85	2.9	18.8	27.5	1	1	11.7	1	2	2	2	6	3
1	0	63	66.8419	1.0546	8.2744	2.7754	3.06889	0.26	217.95	5.09	255	126	4.02	0.31	1.17	5.95	7.46	1.4	22	191	3.64	1.8	2.23	6.29	7.62	1.02	0.28	2.55	19.4	25	0.96	0.96	11.2	2	2	1	1	9	3
0	0	83	62	1.03	7.88	3	3.86	0.15	81.9	1.11	181	125	4.08	0.34	2.21	2.45	5.07	2.6	10	235	1.91	0.96	1.03	3.57	5.06	1.6	0.48	2.35	17.5	31.7	1.15	1.15	13.4	1	2	2	1	2	4
0	1	67	65	1.02	6.54	2.35	1.79	0.41	201.04	4.69	193	126	4.49	0.39	0.96	4.5	5.99	4.9	9	383	1.66	0.8	0.9	2.87	4.47	1.13	0.26	3.67	18.8	27.6	0.92	0.92	10.8	1	2	2	1	2	3
0	0	58	72.083	1.0588	8.9788	2.8139	2.7103	0.51	208.66	4.25	265	160	4.3	0.65	1.27	5.4	7.37	3.5	18.55	501	1.44	1.1	1.68	3.3	6.17	5.3	1.18	2.9	16.8	25.2	0.95	0.95	11.1	2	2	2	1	2	5
0	1	87	9.74	0.47	8.0882	2.83	1.81	0.22	340	7.31	289	98	3.42	0.19	0.85	6.21	7.28	152.9	37.76	220	2.64	0.42	0.65	3.36	5.45	10.25	2.09	1.08	20	41.7	1.4	1.38	16.2	1	2	1	1	2	5
0	1	78	67.8202	1.074	8.5484	3.048	3.27368	0.28	50.37	1.79	68	116	3.69	0.38	1.35	2.42	4.26	5.527	14	260	1.82	0.93	1.06	3.23	4.97	0.53	0.35	3.08	17.7	28.1	1.05	1.05	12.3	2	2	2	2	1	1
0	1	69	71.1	0.7	18.83	5.23	1.89	2.15	125.16	4.35	199	100	3.55	0.74	1.59	6.92	3.89	1.3	13.41	248.99	2.44	1.4454	1.3129	4.9469	7.2379	1.65	0.24	3.91	19.3	26.4	0.9949	0.98	12.3	2	2	1	1	11	5
0	1	64	71.1	0.7	18.83	5.23	1.89	0.24	101.04	1.19	195	172	5.26	0.46	1.93	2.3	4.75	4	14.97	318	3.33	2.1	1.84	6.27	6.1	0.7	0.33	2.45	18.2	27.5	0.85	0.85	10	1	1	2	1	6	5
0	1	81	84.7	1.03	9.06	2.83	5.64	114	238.6	4.79	272	122	3.48	0.01	1.14	5.46	4.63	16.9	22	130	1.27	1.27	0.67	2.84	10.77	0	0.18	5.76	17.8	29.4	0.85	0.89	11.8	1	1	1	1	19	1
0	0	66	7.44	1.66	11.52	5.55	6.4	0.32	157.58	3.01	156	129	4.26	0.32	0.99	2.98	4.4	2.8	13.47	280	2.426	1.3483	1.5403	4.7531	5.57	0.53	0.18	2.78	16.5	25	0.97	0.97	11.4	2	2	2	2	5	5
0	1	56	104.7	0.58	23.1	3.84	0.14	3.42	111.06	2.59	251	73	2.83	0.66	2.26	5.85	5.1	3.5	23.3	485	4.46	1.2	1.54	6.36	5.94	1.1	0.77	3.58	18.4	27.4	0.92	0.94	10.1	1	1	1	2	3	3
0	1	54	8.72	1.31	16.2058	6.04	3.89	0.22	106.79	2.46	173	152	4.57	0.35	1.62	3.98	6.08	1.679	17.78	413	4.87	1.3	2.05	6.889	9.09	1.7243	0.3959	2.8379	17.657	27.007	0.9498	0.9499	11.093	2	2	1	1	5	4
0	0	41	141.3	0.8	25.63	4.68	0.958	1.79	100.67	6.77	151	160	4.3	0.84	1.5	10.16	7.37	3.5	9	259	2.56	1.08	2.09	4.51	5.1	13.22	0.28	2.16	17.9	43	1.01	1.11	10.3	2	2	2	2	14	3
0	0	48	67.3443	1.0726	8.5123	2.7333	3.26638	0.2892	124.303	2.5904	210.45	142.77	4.6058	0.5092	1.7012	4.5219	7.0122	5.339	14.67	270.29	2.4692	1.3811	1.4886	5.0953	7.6506	0.38	2.24	3.25	17.1	27.5	0.79	0.79	9.3	1	2	1	1	3	3
0	1	57	72	1.14	16.76	5.46	3.726	0.24	75.85	1.74	223	163	5.18	0.72	2.94	5.13	8.97	3.1	12.96	286.75	2.4344	1.3618	1.4259	4.9705	6.4543	2.2	0.56	3.23	17.8	27.2	0.83	0.84	9.8	2	2	2	2	18	5
0	0	60	79.1	1.19	19.05	5.62	1.8	0.3	155.15	3.58	211	138	4.6	0.41	1.36	4.87	6.69	0.5	9	228	4.63	1.73	1.24	6.92	7.11	1.13	0.24	3.52	18.1	24.5	0.79	0.79	9.3	2	2	2	2	10	3
0	1	80	55.5	1.06	8.46	2.58	2.9	0.29	105.61	3.58	207	147	4.32	0.56	1.96	7.02	10.2	2.91	20	374	2.11	0.9	1.81	3.83	5.65	1.07	0.44	3.37	147.2	34.3	1.12	1.12	13.1	1	1	2	1	3	5
1	1	86	81.5	1.12	8.98	2.4	2.7	4.03	87.58	2.24	141	141.63	4.5122	0.4	1.61	3.61	5.8959	1.559	39	323	2.74	1.23	1.21	4.52	4.52	0.53	1.39	3.05	17.6	23.8	0.92	0.97	10.1	2	1	2	2	8	5
0	0	60	50.3	1.03	6.96	2.58	7.48	0.3	155.15	3.58	211	138	4.6	0.41	1.36	4.87	6.69	0.5	9	228	4.63	1.73	1.24	6.92	7.11	1.13	0.24	3.52	18.1	24.5	0.79	0.79	9.3	2	2	2	2	10	3
1	0	68	63.18	0.67	17.95	4.08	3.374	3.8	98.21	2.86	220	137	4.57	0.59	2.24	6.41	9.83	4.4	13.27	227	2.39	1	0.9	3.8	6.21	9.2733	11.35	4.65	16.9	25.3	0.94	0.9594	10.6	1	1	2	2	9	5
0	1	65	50	1.08	7.75	2.79	6.89	0.2956	122.267	2.5344	208.29	163.7	7.9385	0.5133	1.7159	4.4524	6.8974	1.541	14.39	292.61	2.52	1.4259	1.2398	4.9796	5.882	1.34	0.27	2.13	28.5	30	1.04	1.03	12.1	2	2	2	2	5	5
0	1	68	68.1263	1.0768	8.5662	2.6814	3.51102	0.17	98.56	1.48	206	137	3.99	0.36	2.09	3.09	5.84	3.7	32.97	482	1.14	1.2	3	3.7	5.46	1.07	0.3	3.22	17.6	26.9	0.9	0.91	10.6	2	2	2	2	2	5
0	1	43	55	1.07	8.09	2.32	2.8	0.26	121.85	3.89	184	147	4.91	0.4	1.51	5.88	7.85	2.8	18	252	3.12	1.03	2.04	5.08	7.48	1.47	0.33	2.47	19.2	25.9	0.97	0.97	11.4	2	2	2	1	5	3
0	1	54	120	1.21	11.19	2.64	4.15	0.54	190.53	8.31	181	157	4.94	0.51	0.95	7.89	9.4	1.1	21.83	189	2.14	0.87	1.25	3.58	5.72	1.3	0.32	1.73	21.7	27.3	0.86	0.86	10.1	2	2	2	1	10	1
0	0	74	67.9017	1.0955	8.334	2.7486	3.39524	0.2955	109.557	1.706	211.79	139.93	4.4533	0.5323	1.9	3.27	5.67	2.9	21	519	4.09	1.3	1.95	6.69	4.5	1.87	0.79	2.84	17.6	28.6	1.02	1.02	11.9	2	2	2	1	2	5
0	1	64	81.4	1.4	8.91	3.59	3.8	0.32	139.66	2.46	243	151	5.16	0.56	1.74	4.28	6.64	6.6	18.8	247	2.64	1	3.87	5.4	14.41	0	0.19	2.53	17.6	29.5	0.96	0.96	11.2	2	2	1	1	9	1
1	1	79	71.3	0.93	9.34	2.86	2.96	0.41	159.05	9.4	167	164	5.49	0.43	1.05	9.87	11.41	5.5	21.78	400	2.3738	1.3259	1.6281	4.31	7.31	1.87	0.44	3.37	17.3	28.8	1.05	1.05	12.3	1	2	2	1	0	1
0	1	55	67.9347	1.1	8.68	2.94	1.72	0.2	67.74	1.36	210	153	4.84	0.62	3.1	4.22	8.24	2.1	24	403	2.16	0.93	1.06	3.57	5.63	1.07	0.22	2.31	97.4	37.2	1.19	1.19	13.9	1	1	2	1	4	1
1	1	55	66.9858	1.0466	8.4628	2.7683	2.80859	0.26	101.1	2.04	183	148	4.55	0.47	1.81	3.69	6.31	4.6	32	329	2.46	0.6	1.06	3.54	5.06	1.07	0.24	1.25	17.9	26.9	1.01	1.01	11.8	2	2	2	2	28	5
1	1	90	7.66	8.02	15.87	5.58	3.18	0.29	103.19	5.6	97	145	5.14	0.27	0.94	5.26	6.57	4.9	15.18	373	2.11	1.1	2.04	4.14	16.65	1.9	0.42	2.86	17	26.5	0.89	0.89	10.4	2	2	1	1	3	3
0	1	57	67.5	0.75	9.37	2.45	1.01	0.25	88.94	1.89	209	153	4.74	0.58	2.35	4.43	7.67	0.5	15.25	319.36	2.387	1.4033	1.6357	4.9706	10.2049	0.6	0.19	3.06	17.9	24.6	0.79	0.79	9.2	2	2	1	1	3	3
0	0	81	66.7722	1.0209	8.3221	2.7509	2.56615	0.34	151.26	4.76	180	124	4.06	0.4	1.19	5.67	7.31	0.5	15.04	262	1.17	1.09	0.89	2.9	5.26	2.19	0.69	3.07	17.8	27.2	1.03	1.03	12	2	2	2	2	7	3
0	1	81	62.8	1.3	7.41	3.11	7.89	0.22	146.53	1.8	296	127	4.36	0.45	2.02	3.63	6.43	0.9	12	224	3.04	1.39	1.02	5.19	5.12	2.67	0.61	2.73	16.7	27.9	0.96	0.96	11.2	2	2	2	2	8	3
0	0	80	65.9301	1.057	8.1954	2.7994	2.24924	0.38	168.84	3.91	233	131	4.39	0.53	1.38	5.4	7.51	5.4	15.89	325	2.8	1.16	1.07	4.45	4.05	1.13	0.63	2.67	18.1	25.5	1.01	1.01	11.8	2	2	2	1	10	5
1	1	59	71.74	1.0576	8.76	2.7273	3.30509	5.54	85.42	2.44	123	139	4.5	0.26	1.44	3.52	5.73	0.5	38	482	2.1	1.29	2.47	4.51	5.56	2.14	0.18	3.15	17.7	29.2	0.97	0.89	10.7	2	1	1	2	3	5
0	1	42	59.8	0.9	7.42	2.55	2.6	4.37	80.62	1.76	183	133	4.73	0.52	2.27	4	10.65	2.8	16.44	235	1.52	1.2	0.61	3	5.14	1.6	3.17	3.37	16.1	23.2	0.99	1.08	10.2	2	1	1	2	4	1
0	0	58	108.6	0.85	20.1	4.4	3.078	0.18	115.67	1.93	251	145	4.84	0.39	2.17	4.18	6.81	3.6	10.47	264	2.79	1.7	1.15	5.01	6.23	1.1	0.28	2.3	17.8	25	0.85	0.85	10	2	2	2	1	6	3
0	1	74	68.7	1.01	8.79	3.08	1.68	0.4	165.44	2.93	225	111	3.73	0.54	1.36	3.99	6.34	2.5	12.41	270.1	2.4239	1.3557	1.2669	4.8068	5.3109	2.14	1.15	2.68	17.2	29.1	1.01	1.01	11.8	2	2	2	2	3	4
1	1	67	58	0.89	7.75	2.33	1.72	0.44	285.19	5.3	308	136	4.52	0.48	1.08	5.72	7.61	13.8	15	334	2.85	1.36	3.7	5.27	21.61	1.6	0.33	4.48	17.7	25.9	0.88	0.88	10.3	2	2	1	1	8	5
0	1	59	66.6456	1.102	8.3473	2.7853	3.19288	6.36	54.9	1.11	157	141	4.74	0.45	2.86	3.18	8.07	1.5	17	206	2.78	0.91	1.98	4.58	6.16	0.53	0.19	1.77	18.6	29.3	0.88	0.9	10.1	2	1	2	2	11	5
0	1	59	76	1.27	9.31	3.44	0.66	3.76	100	2.12	233	118	4.49	0.62	2.33	4.95	5.28	0.5	14.62	320	2.44	1.13	3.71	4.35	5.47	14.11	0.22	3.3	17.9	30.4	0.89	0.88	10.5	2	1	1	1	4	2
0	0	86	71.3921	1.051	8.7316	2.8134	2.94482	0.23	101.48	2.7	137	147	5.17	0.31	1.35	3.64	5.79	1.6	12	295	2.71	1.72	1.13	4.95	5.17	1.69	0.38	2.86	17.1	27.8	0.9	0.91	10.6	2	1	2	1	4	5
0	0	78	46.4	0.82	7.11	2.39	3.57	0.2	74.02	2.42	188	116	3.64	0.52	2.54	6.14	9.48	1.89	16	189	3.33	0.81	4.08	5.99	8.44	2.67	0.68	2.84	17.5	26.8	0.96	0.97	11.3	1	2	1	1	1	5
0	1	79	59.7	1.14	7.69	2.69	8.36	0.26	122.96	2.53	166	128	4.26	0.35	1.35	3.42	5.14	1.8	14	265	3.09	1.51	0.94	5.03	5.53	1.34	0.32	3.02	15.4	26.6	0.98	0.98	11.5	2	2	2	1	4	1
0	0	69	8.02	4.98	15.2	5.11	1.9	0.2	98.27	1.86	227	139	4.41	0.47	2.31	4.3	7.21	0.6	18	271	2.18	0.88	0.72	3.39	4.3	1.13	0.19	2.55	18.8	28.9	1.02	1.02	11.9	1	2	2	1	2	3
0	0	70	7.26	0.96	14.3934	4.27	1.25	0.23	135.71	1.9	171	123	4.02	0.29	1.26	2.4	4.1	0.4	9	179	1.39	0.8	1.36	2.81	8.13	3.48	0.95	2.09	16.1	21.8	1.07	1.07	12.5	1	2	1	1	7	5
0	0	91	55.4	0.89	7.8	2.36	1.94	0.19	146.79	1.94	229	155	4.93	0.29	1.56	3.02	5.02	0.4	18.15	318.55	2.4337	1.3202	1.2736	4.3988	5.434	9.6	3.35	2.73	17.4	27.5	0.96	0.96	11.2	2	2	2	2	3	1
1	0	83	6.83	5.09	14.64	4.06	1.44	3.07	188.04	8.22	173	143	4.62	0.3	0.92	7.56	7.09	0.5	16.18	341	2.74	1.6	2.55	5.5	5.88	4.2	0.92	2.8	17.3	26.3	0.94	0.99	12.7	1	2	1	2	16	1
0	1	58	55.4	0.96	7.9	3.16	3.27	0.34	137.25	2.91	140	149	4.74	0.35	1.02	2.97	4.58	0.4	23	268	2.22	1.05	1.54	3.97	5.41	0.8	0.18	1.66	18.8	23.8	0.99	0.99	11.6	1	2	2	1	0	5
0	1	59	70.5224	1.0996	8.6793	2.7407	2.39726	0.22	171.77	1.74	359	147	4.88	0.45	2.09	3.64	6.38	2.934	9	303	3.04	1.31	1	4.8	4.67	0.53	0.19	5.06	16.4	27.3	0.92	0.92	10.8	2	2	2	2	5	1
1	1	54	6.24	5.33	14.2	5.82	0.99	3.51	138	4.6	276	125	3.96	0.57	2	9.19	4.04	1.1	10	216	3.08	1.65	0.93	5.15	5.33	1.51	0.81	3.02	15.4	22.8	0.91	0.95	11.9	1	1	1	1	3	5
0	1	70	70.863	1.0111	8.6832	2.798	3.03672	2.28	108.76	2.61	149	117	4.01	0.6	1.37	3.58	4.65	1.2	18	188	2.02	1.49	0.89	3.91	5.37	3.4	0.19	4.46	16.8	26	0.89	0.92	12.6	2	1	1	1	9	5
1	0	81	69.7	0.96	17.22	4.42	3.355	0.28	200	5.08	270	130	4.14	0.38	1.35	6.86	8.63	0.5	17	185	2.1	1.02	1.42	3.77	14.92	5.91	1.86	3.83	16.6	23.7	0.93	0.93	10.9	1	2	1	1	9	5
0	1	58	68.4	0.91	8.06	2.43	1.11	4.92	91.76	1.9	167	132	4.03	0.37	1.82	3.45	4.49	5	13.57	218	2.36	1.6	3.37	4.9394	11.24	2.14	0.19	3.62	16.5	27.1	1.07	0.84	13.2	1	1	1	2	19	5
0	0	72	60.6	0.89	8.18	2.48	2.46	0.42	150.94	2.15	320	136	4.56	0.89	2.12	4.55	7.22	0.5	21.42	261	1.26	1.1	2.28	3.4	15.96	0.8	0.42	2.78	17.7	26.4	0.88	0.88	10.3	1	2	1	1	1	3
0	1	61	59.4	1.29	15.35	5.47	1.404	0.34	234.29	6.54	246	138	4.4	0.36	1.05	6.87	8.31	0.6	15.27	364	2.23	1.4	0.82	4.38	7.71	1.87	0.42	1.56	15.6	24.1	0.89	0.89	10.4	2	2	2	2	7	3
0	1	78	67.9812	1.0341	8.457	2.7844	2.97938	2.22	121.67	1.94	146	145	4.67	0.54	1.2	2.33	7.45	2.208	10	255	2.28	1.31	1.19	4.13	6.15	0.56	0.34	3.54	16.7	23.9	1	0.93	11.2	2	1	1	2	12	3
0	0	65	88.8	1.35	9.89	2.59	2.66	7.28	71.13	1.3	207	152	5.27	0.4	2.91	3.78	7.43	1.5	18.15	316.59	1.13	1.9	1.03	3.5	6.474	4.28	0.61	3.62	17.739	25.4	0.92	0.93	9.8	2	1	1	1	2	2
0	1	71	77.9	1.35	8.87	3.1	11	0.15	96.91	1.57	157	153	4.77	0.25	1.62	2.54	4.57	1.451	11	244	2.68	1.8	0.92	4.9	5.32	2.41	0.52	2.31	18.7	31.2	0.99	0.99	11.6	1	2	2	2	1	4
0	1	79	64.4668	1.0456	7.5352	2.7114	2.64994	2.32	160.55	6.52	175	157	4.62	0.47	1.09	7.11	7.03	1.5	14.08	283.57	2.4285	1.3427	1.2981	4.7424	7.7277	0.8	0.327	3.86	16.6	24.1	2.23	0.97	10.1	1	2	1	2	16	1
0	0	65	36.1	0.85	7.18	2.65	3.91	0.18	68.53	1.61	98	125	3.96	0.26	1.43	2.3	4.04	1.1	10	296	2	1.16	1.48	4.16	7.41	3.21	0.35	2.48	18.9	26.9	1.11	1.1	12.9	2	2	1	2	3	4
0	1	56	69.5696	1.0777	8.7058	2.7688	2.35274	0.31	130	4.11	247	154	4.69	0.58	1.9	7.81	10.32	1.1	21.56	416	4.43	1.1	1.25	6.1	5.1	1.87	0.22	2.78	17.9	25.7	1.02	1.02	11.9	2	2	2	1	3	5
0	0	63	73.6	1.21	15.47	5.14	1.505	0.22	93.33	1.98	266	137	4.34	0.62	2.85	5.63	9.38	0.5	12	285	3.66	1.05	2.08	5.65	4.65	1.1	0.19	2.3	17.6	30.8	0.94	0.94	11	2	2	2	1	2	5
0	1	46	40.5	0.87	6.73	2.06	1.03	0.3	171.64	4.03	230	157	5.13	0.4	1.34	5.4	7.17	0.5	20.44	305.22	1.13	1.9	1.03	3.5	6.8737	1.6	0.61	3.37	17.7	22.1	1.02	1.02	11.9	2	2	2	2	6	5
0	0	68	67.1	1.48	8.05	3.4	4.73	0.12	98.67	1.12	223	124	4.23	0.26	2.26	2.52	5.25	0.4	10	253	3.03	1.54	0.86	4.96	5.83	2.14	0.57	2.03	18.3	24.4	0.89	0.89	10.4	2	2	2	1	4	5
0	1	71	79.1	1.23	9.51	2.93	2.18	0.28	165.67	2.66	222	142	4.64	0.37	1.34	3.56	5.44	2	15	274	2.39	1.15	1.23	4.1	5.26	1.87	0.74	3.02	16	28.2	1.01	1.01	11.8	2	2	2	1	2	1
0	0	57	66.3683	1.0442	8.2313	2.7612	3.61823	0.14	66.53	1.39	161	124	4.08	0.33	2.42	3.36	6.17	1.18	12.05	196	1.63	1.18	1.95	3.49	6.39	2.157	0.499	2.6147	22.008	27.411	0.95	0.95	11.1	1	2	1	2	9	5
0	1	47	82.4	1.17	8.58	2.59	2.23	0.14	56.14	0.9	256	146	5.16	0.64	4.56	4.11	9.66	1.4	12	233	3.21	0.93	1.28	4.72	4.55	1.6	0.19	3.53	17.3	27.9	0.82	0.82	9.6	2	2	2	1	3	1
1	1	86	68.5	0.73	9.46	2.16	2.43	0.61	278.38	4.34	206	135	4.12	0.45	0.74	3.21	4.71	3.2	71	334	2.72	1.19	0.65	4.2	4.7	1.07	0.25	1.35	19.2	35.1	1.16	1.15	13.5	2	1	2	2	9	5
1	0	76	9.27	0.76	18.2019	3.75	2.21	0.42	134.78	8.35	155	130	4.55	0.48	1.15	9.6	11.32	20.9	11	304	2.89	0.86	1.35	4.36	17.77	6.8	3.7	5.39	17.9	23.8	1.07	1.07	12.5	2	2	1	1	7	5
1	1	86	89	0.82	10.9	2.77	3.24	0.51	435.38	8.52	283	97	3.38	0.33	0.65	5.54	6.61	8.4	10	236.6	1.77	1.24	0.55	3.26	8.9198	7.67	2.15	3.53	19.1	29.1	0.99	0.99	11.6	1	2	1	1	1	3
0	1	81	64.7	0.72	10	2.51	0.84	0.11	149.59	5.87	181	156	5.06	0.13	1.21	7.1	8.46	0.8	15.23	331	2.84	1.5	1.01	4.8	7.69	0.9	0.29	2.73	19.2	26.3	0.91	0.91	10.7	2	2	2	1	4	1
0	1	67	4.87	5.26	16.67	6.12	3.41	0.41	201.04	4.69	193	126	4.49	0.39	0.96	4.5	5.99	4.9	9	383	1.66	0.8	0.9	2.87	4.47	1.13	0.26	3.67	18.8	27.6	0.92	0.92	10.8	1	2	2	1	2	3
0	1	79	67.6	1.07	8.02	3.06	2.25	5.07	104.23	2.59	148	146	4.67	0.28	1.42	3.68	7.72	2.4	12	240	6.51	1.71	1.41	8.86	7.04	0.53	1.34	3.3	17.3	26.4	0.94	0.92	9.6	2	1	1	1	4	2
0	1	67	81.35	1.2	15.99	4.48	2.03	2.16	112.12	4.35	148	132	4.37	0.61	1.32	5.74	4.51	0.5	17.46	274	1.36	0.63	0.94	2.6	4.6	34.8	0.31	3.82	17.3	27.8	0.95	1.07	10.8	2	1	1	2	4	5
0	1	74	4.19	0.85	8.41	2.43	5.93	0.22	137.82	1.7	215	114	3.56	0.34	1.56	2.65	4.87	2.854	23	429	2.29	0.93	1.09	3.92	4.25	4.28	1.21	2.09	16.8	26.4	0.98	0.98	11.5	2	2	2	1	9	1
0	0	90	81.5	0.87	9.71	2.75	2.26	0.32	111.97	3.51	159	105	3.39	0.45	1.42	4.99	6.96	1.3	14.58	197	2.1	1.7	1.81	4.62	6.09	2.6	1.14	2.69	16.8	25.9	0.88	0.88	10.3	1	2	2	1	2	5
0	1	45	69.8493	1.0285	8.7128	2.8389	3.02182	3.54	99.61	2.37	254	140	4.97	0.72	2.55	6.04	6.11	0.5	11	326	2.01	1.28	0.86	3.68	6.16	1.1	0.19	2.67	16.8	30.2	0.95	0.85	13.1	2	1	1	2	35	5
0	1	64	70.2863	1.0796	8.6508	2.8068	3.26945	7.21	35.61	0.8	172	142	4.49	0.67	4.83	3.88	10.56	16.3	12	295	2.71	1.72	1.13	4.95	5.17	2.8	0.38	3.08	16.6	25.5	0.92	0.89	10.6	2	1	1	2	4	3
0	1	51	71.6	0.97	9.34	3.01	3.67	0.45	137.33	6.4	206	163	5.23	0.67	1.5	9.6	11.91	4	25.13	326	0.02	1.1	5.02	8.36	14.07	0.53	0.19	2.44	15.6	28.2	0.91	0.91	10.7	2	2	1	1	12	4
0	1	38	37.6	0.78	7.95	2.2	2.57	6.79	116.75	1.23	230	146	5.16	0.29	1.97	2.42	9.66	1.4	28.75	508	0.48	1.8	1.37	2.9	5.71	1.07	1.01	3.19	18.2	30.9	0.96	0.97	10.9	1	1	1	1	2	1
1	0	72	8.74	4.96	17.76	5.77	2.99	0.54	85.06	6.32	131	138	4.6	0.83	1.54	9.74	12.47	4.7	16	316	2.85	1.18	2.78	5.29	9.98	1.69	0.8	4.2	17.6	26.7	0.85	0.85	10	2	1	1	1	4	1
0	0	69	54.8	0.88	7.94	2.5	1.64	0.19	101.72	1.94	177	150	4.62	0.33	1.74	3.37	5.48	0.5	47	300	1.98	0.93	1.4	3.52	4.83	1.87	0.22	1.94	18.9	27.7	0.98	0.98	11.5	2	2	2	2	6	5
0	0	53	81.5	0.83	8.7	2.26	2.82	0.22	131.13	2.46	198	138	4.98	0.33	1.51	3.72	5.68	1.37	12	390	2.31	0.87	2.33	4.24	5.98	0.8	0.23	3.08	18.2	29.2	0.92	0.92	10.8	2	2	2	1	4	3
0	1	78	73.9	1.07	8.47	2.83	3.33	0.29	150.77	2.53	196	156	4.67	0.38	1.3	3.29	5.06	0.7	18.32	299	0.99	2.5	0.9	3.9	6.9	5.08	1.34	3.45	15.4	26.1	0.89	0.9	10.5	2	2	2	1	5	1
1	1	83	51.7	0.74	8.11	2.32	1.93	0.37	303.48	4.75	349	118	3.8	0.43	1.15	5.46	7.07	12.2	18.46	359	3.46	1.2	0.96	5.1	6.89	12.63	3.64	4.75	16.4	28	1	1	11.7	2	1	1	1	5	5
0	1	56	84.7	1.03	9.06	2.83	5.64	0.32	89.66	2.53	156	154	5.1	0.56	1.74	4.4	6.9	0.4	17	278.51	0.93	0.98	0.98	2.36	5.2595	1.07	0.18	2.01	17.8	28.1	1.04	1.03	12.1	1	2	2	1	5	1
0	1	71	69.7	1.33	9.4	3.29	5.05	0.18	102.58	1.5	278	166	5.02	0.48	2.71	4.07	7.58	2.5	14	458	2.2	1.03	1.68	3.97	5.31	1.07	0.27	2.13	16.5	28.6	1.07	1.07	12.5	1	2	2	1	7	4
0	0	66	62.1	1.2	8.41	3.2	1.87	0.18	131.58	1.64	200	136	4.33	0.28	1.52	2.5	4.51	0.5	9	259	2.56	1.08	2.09	4.51	5.1	0.53	0.28	2.09	15.5	27.8	1.01	1.01	11.8	2	2	2	1	5	1
0	0	76	88.8	1.35	9.89	2.59	2.66	0.29	132.41	3.9	192	146	4.67	0.42	1.45	5.66	7.72	2.4	23	168	3.58	0.8	2.71	5.61	5.46	3.48	1.15	3.15	17.3	25.1	0.96	0.97	11.3	1	2	1	1	1	3
0	1	56	71.1991	1.0888	8.8616	2.7619	3.65592	3.48	97.66	3.32	292	153	5.17	0.86	2.99	9.93	6.74	3.1	13	295	1.59	1.03	1.17	3.15	4.7	4	0.4	4.91	18.9	26.4	0.79	0.93	10	1	1	1	1	2	1
0	0	72	88.8	1.35	9.89	2.59	2.66	0.27	154.32	3.23	250	120	4.15	0.44	1.62	5.23	7.44	2.195	9	202	1.35	1.01	1.15	2.88	4.25	0.8	0.25	3.62	17.6	28.9	0.97	0.97	11.4	1	2	1	1	0	3
0	1	70	81.5	0.83	8.7	2.26	2.82	3.42	161.32	3.96	171	116	3.82	0.31	1.06	4.2	4.01	0.5	20.87	485	1.82	1.1	2.38	4	7.56	3.74	0.2	2.69	17.1	24.6	1	0.94	11.7	1	1	2	1	4	1
1	0	69	96.8	0.97	11.19	2.59	11	0.56	225.51	6	221	132	4.35	0.55	0.98	5.88	7.54	4.9	13.5	243.75	3.04	1.55	0.9	5	19.2	4.81	1.7	3.02	17.2	23.2	0.93	0.93	10.9	2	2	1	2	7	3
0	1	78	48.4	0.94	9.14	2.79	2.6	1.49	117.86	4.21	132	130	4.55	0.75	1.12	4.72	11.32	20.9	21.42	280	1.25	1.2	1	2.9	6.63	2.94	0.8	2.66	15	35.1	0.9883	0.97	9.9	2	1	1	2	15	1
0	1	56	9.87	1.93	13.36	7.05	0.007	0.31	130	4.11	247	154	4.69	0.58	1.9	7.81	10.32	1.1	22.29	416	4.43	1.1	1.25	6.1	5.1	1.87	0.22	2.78	17.9	25.7	1.02	1.02	11.9	2	2	2	1	10	5
0	0	73	75.8	1.26	10.7	3.19	6.64	0.19	115.11	2.69	160	155	5.03	0.27	1.39	3.74	5.65	1.2	11	266	1.05	1	0.97	2.57	4.79	0.37	0.21	2.13	17.9	34	1	1	11.7	2	2	2	1	5	5
0	1	79	89	0.82	10.9	2.77	3.24	0.57	118.95	3.36	113	155	4.85	0.54	0.95	3.19	4.74	12.1	16	370	1.87	0.85	1.24	3.29	5.33	3.2	0.72	3.75	17.6	23.7	0.9	0.9	10.5	2	2	2	1	4	1
0	1	82	68.5162	1.0923	8.8317	2.8193	3.61154	0.18	104.41	3.22	237	122	4.02	0.41	2.27	7.3	10.02	0.5	12.07	272.67	2.4587	1.3691	1.5718	4.7034	7.4385	6	1.93	3.56	17.4	23.9	0.81	0.81	9.5	1	2	2	2	5	5
0	1	52	70.0743	1.0792	8.737	2.8316	2.92369	5.38	71	1.57	191	138	4.67	0.5	2.69	4.21	8.35	3.7	23	268	2.22	1.05	1.54	3.97	5.41	2.67	0.18	2.67	17.5	27.2	1.01	0.89	10.8	1	1	1	2	3	5
0	0	75	55	1.07	8.09	2.32	2.8	0.21	172.59	1.59	233	118	3.8	0.29	1.35	2.14	3.9	1.9	11	259	2.99	1.21	1.15	4.72	4.04	0.8	0.66	2.03	17.3	27.2	0.98	0.98	11.5	1	2	2	1	0	1
0	1	70	65.5	1.2	8.28	3.21	2.2	0.63	112.03	1.75	149	145	4.51	0.84	1.33	2.33	4.55	1.7	24.93	297	0.77	1.4	2.04	3.1	6.47	0.8	0.27	2.35	15.8	25.9	0.89	0.9	10.5	2	2	1	1	23	5
0	0	74	70.8499	1.0422	8.552	2.719	2.9453	4.08	115.09	3.21	183	145	4.51	0.39	1.59	5.1	4.55	1.7	12.76	283.25	2.4209	1.3385	1.2818	4.7453	5.9138	0.75	0.84	3.58	17.322	28.3	0.86	0.98	11.3	2	1	2	1	4	5
1	1	72	69.8669	1.036	8.7442	2.8147	2.73509	0.41	115.57	3.39	193	139	4.62	0.69	1.67	5.66	8.26	2.451	10	313	2.27	1.29	1.24	4.12	10.29	1.65	0.51	2.67	18.7	25.8	0.94	0.94	11	2	2	1	2	13	3
0	0	90	69.4252	1.1146	8.7749	2.849	3.39899	0.22	92.48	1.21	209	142	4.63	0.5	2.26	2.74	5.55	2.3	12.01	301.24	2.4105	1.3732	1.3303	5.0297	4.9058	2.55	0.78	2.63	18.1	27	0.89	0.9	10.5	2	2	2	1	4	1
0	1	52	64.2	1.16	9.03	2.91	2.86	0.2	161.21	1.39	345	142	4.53	0.42	2.14	2.97	5.75	2	13	363	1.72	1.37	2.29	4.13	8.19	1.87	0.53	3.08	16.2	27.3	0.94	0.94	11	1	2	1	1	4	4
1	0	86	60.9	0.93	9.41	2.6	2.89	2.07	220.43	11.42	205	152	4.57	0.45	0.93	10.62	6.08	7.559	9	206	1.61	0.73	1.5	3.23	9.93	0.27	0.19	3.15	16.4	31.3	1.11	0.99	10.9	2	2	1	2	20	3
0	0	66	67.3124	1.0837	8.5508	2.782	3.3246	0.17	111.68	1.83	239	128	4.39	0.36	2.14	3.92	6.52	0.7	19.79	293	0.4	1.2	5.94	4.3	6.51	0.9	0.48	2.45	16.4	23.7	0.82	0.82	9.6	2	2	1	1	3	3
0	1	70	6.24	5.33	14.2	5.82	0.99	0.56	190.27	4.67	215	143	4.62	0.63	1.13	5.28	7.09	0.5	10	264	3.3	1.06	1.2	4.9	6.06	2.07	0.44	2.76	17.9	25.3	0.9	0.91	10.6	2	2	2	2	10	1
0	1	65	65.5992	1.0147	8.0062	2.6637	4.04292	0.25	114.41	2.64	135	122	3.48	0.29	1.18	3.11	4.63	16.9	22.96	274	1.36	0.63	0.94	2.6	4.6	0.76	0.31	3.19	15.9	31.8	1.01	1.01	11.8	2	2	2	2	8	5
0	0	79	72.9	1.05	9.15	2.4	7.03	0.24	152.67	3.63	200	138	72.8	0.31	1.31	4.75	6.53	1.3	14	298	3	1.11	2.51	5.25	5.9	2.55	0.84	3.13	17.3	29.5	0.96	0.97	11.3	1	2	2	2	9	1
0	1	60	52.1	0.95	6.12	2.57	3.02	0.58	334.69	29.29	164	118	3.66	0.85	0.49	14.35	6.13	3.1	22.89	304.89	2.4659	1.428	1.8447	5.4083	9.9471	1.87	0.19	1.56	18	26.2	1.34	0.95	16.4	1	1	1	2	11	5
0	1	57	68.7992	1.0525	8.8109	2.6719	2.92598	3.11	116.84	4.54	229	118	3.81	0.63	1.96	8.9	6.6	40.5	22.64	501	1.44	1.1	1.68	3.3	6.17	2.267	1.18	3.12	17	27.5	0.9549	1.0408	10.6	2	1	2	2	17	1
0	0	58	66.6866	1.0998	8.4002	2.85	3.77355	0.11	76.95	0.77	197	136	4.54	0.28	2.56	1.96	4.9	0.9	13.13	328.71	2.4109	1.373	1.5162	4.9007	5.3397	1.7	0.84	2.53	18.4	26.7	0.79	0.79	9.2	2	2	2	1	3	5
0	0	74	82.1	1.02	9.97	2.79	2.51	0.14	120	3.14	168	145	4.78	0.2	1.4	4.39	6.07	2.635	13.2	249	2.4445	1.4144	1.9825	5.0101	34.33	2.94	0.52	2	19.8	26.8	0.92	0.92	10.8	2	2	1	1	10	1
0	1	56	10.24	5.16	21.79	5.85	1.04	0.33	137.12	3.67	181	157	5.27	0.44	1.32	4.84	6.94	1.4	10	229	2.43	1.14	2.86	4.86	11.13	0.94	0.19	4.41	16.9	24.8	0.85	0.85	10	2	2	1	1	0	5
1	0	55	6.98	7.13	12.47	3.57	0.69	1.33	233.96	24.84	248	126	5.08	1.41	1.06	26.33	28.84	22.9	16.04	340	3.43	1.4	1.34	5.44	6.29	2.1	0.62	3.3	16.8	23.6	0.87	0.87	10.2	2	2	2	1	16	5
0	1	70	58.5	1.04	7.49	3.51	1.95	0.33	101.1	2.47	183	152	4.79	0.59	1.81	4.47	7	1.537	10	255	2.28	1.31	1.19	4.13	6.15	1.1	0.34	2.96	17.7	27.2	0.94	0.94	11	2	2	1	1	5	5
0	0	57	66.9095	1.0163	8.3179	2.8141	3.32356	0.36	215.56	5.32	194	136	4.85	0.32	1.42	2	3.85	4.4	11	331	2.71	1.06	1.63	4.38	5.55	0.47	0.24	2	16.7	30.3	0.97	0.97	11.4	2	2	2	2	4	5
0	0	64	6.91	7.68	16.93	5.08	2.36	0.17	208.16	3.37	306	124	4.13	0.25	1.47	4.96	8.2	9.7	14	397	1.26	1.32	1.61	3.31	4.99	7.25	1.8	3.38	18.4	25.2	0.84	0.85	9.9	1	2	2	1	4	5
1	1	58	73.0538	1.312	8.8798	2.6411	25.8799	0.27	236.54	2.56	246	129	4.38	0.28	1.04	2.66	4.05	6.566	12	337	8.4	1.19	1.79	10.41	7.08	1.13	0.39	4.53	18.7	27.9	0.93	0.93	10.9	2	2	1	1	16	3
0	1	62	67.5464	1.0939	8.5468	2.8426	2.97297	0.2	80.65	1.8	200	164	5.28	0.5	2.48	4.46	7.6	1.381	16.66	320	2.44	1.13	3.71	4.35	5.47	0.8	0.22	2.06	18.5	27.9	0.96	0.97	11.3	2	2	2	1	2	5
0	1	42	9	3.92	17.67	3.82	0.49	4.15	146.1	5.78	206	136	4.52	0.34	1.41	8.15	4.71	2.1	11	241	2.76	1.22	1.19	4.52	4.75	1.51	0.19	2.61	17.7	27.2	0.95	0.95	11.4	2	1	1	2	6	1
0	1	53	12.32	2.14	20.58	7.61	0.01	4	154.88	5.2	254	141	4.54	0.41	1.64	8.53	4.56	2.3	15.25	316.37	3.48	2.6	1.81	6.9	9.1513	0.53	0.73	4.11	17.8	26.7	1.08	0.92	10.6	2	1	1	2	12	3
1	0	76	64.7	0.72	10	2.51	0.84	0.51	267.69	8.28	174	130	3.99	0.33	0.65	5.38	6.38	0.4	31	314	2.25	1.03	1.58	4	11.47	2.94	0.69	3.53	17.8	25.6	0.96	0.96	11.2	2	2	1	1	5	1
0	1	59	55.4	0.96	7.9	3.16	3.27	0.16	131.02	2.11	283	122	4.27	0.35	2.16	4.55	7.16	2.9	9	274	2.73	1.12	3.02	5.22	4.25	1.07	0.29	2.53	17.2	27.6	0.94	0.94	11	2	2	2	1	4	5
1	1	83	50.1	0.69	14.85	3.65	0.662	0.19	241.35	5.61	251	164	5.34	0.2	1.04	5.83	7.08	0.6	21.91	420	3.4	1.3	0.65	6.32	10.04	12.48	4.75	2.73	16.4	26.4	1.08	1.08	12.6	1	2	2	1	14	1
0	1	45	68.67	1.0411	8.7435	2.7162	3.13181	0.23	121.77	2.34	151	144	4.41	0.28	1.24	2.9	4.51	0.5	14	387	2.09	0.78	1.72	3.65	5.61	0.75	0.27	3.02	16.5	27.4	0.88	0.88	10.3	2	2	2	2	3	3
1	0	91	58.624	1.0405	8.0371	2.9649	4.47239	0.43	135	4.12	81	110	3.36	0.26	0.6	2.47	3.38	5.1	17.93	235	1.52	1.2	0.61	3	5.14	13.22	3.17	2.58	16.5	30.4	1.11	1.11	13	2	1	2	2	4	2
0	0	77	90.3	0.65	17.61	3.59	1.732	0.25	299.17	4.69	362	86	3.08	0.3	1.21	5.68	7.34	4.377	7	215	2.6278	1.3589	1.2739	4.8236	10.7795	4.6013	1.1689	3.0073	17.745	27.178	0.9487	0.9519	11.028	2	2	1	1	3	4
0	0	81	69.8626	1.0601	8.6055	2.5987	4.34132	0.22	288.8	3.22	361	128	4.08	0.27	1.25	4.03	5.61	1.3	15.18	294	2.61	0.8	2.26	4.44	8.7	1.9	0.76	3.23	18.6	23.6	0.89	0.89	10.4	2	1	1	1	5	5
0	0	67	103.9	1.13	21.5	4.67	6.111	0.14	85.97	1.33	190	120	4.11	0.3	2.21	2.93	5.48	1.1	12.25	273.96	2.4224	1.4598	1.3741	4.997	5.5931	1.1	0.21	2.67	19	27.1	0.87	0.87	10.2	2	2	2	1	7	3
0	1	70	8.21	51.4	17.49	6.29	2.46	3.69	145.83	2.06	210	151	5.47	0.39	1.44	2.96	15.7	0.8	14.66	262	4.13	1.2	1.52	6.02	7.01	4.52	0.48	3.37	18.5	25.9	0.91	0.95	10.7	2	1	1	2	3	3
0	1	75	9.74	1.62	14.8713	5.7	2.27	0.23	119.89	2.01	211	118	3.66	0.41	1.76	3.54	6.13	3.1	9	177	1.6	1.1	1.15	3.22	8.48	2.14	0.52	2.06	17.5	29.5	0.96	0.96	11.2	1	2	1	1	3	4
0	0	65	108.36	1.06	18.17	4.46	0.78	0.33	218.25	4.14	275	147	4.83	0.41	1.26	5.22	7.04	2.8	14	258	2.5	0.77	1.02	3.73	4.28	0.74	0.19	2.04	18.1	25.5	0.96	0.97	11.3	2	2	2	1	3	1
1	1	80	9	3.92	17.67	3.82	0.49	0.62	212.82	7.99	166	105	3.8	0.48	0.78	6.23	7.52	5.3	19.66	460	1.33	1.5	0.57	3.09	5.28	4.2	1.19	2.65	16.7	24.9	0.99	0.99	11.6	2	2	2	2	9	5
1	1	67	11.2	5	21.77	5.49	0.73	0.36	212.82	7.49	249	172	5.41	0.42	1.17	8.76	10.43	0.5	15	267	5.43	1.48	1.59	7.63	17.33	1.51	0.22	3.38	17.9	26.3	0.83	0.83	9.7	1	2	1	1	5	1
1	1	58	46.4	0.82	7.11	2.39	3.57	3.56	105.91	2.6	215	129	4.25	0.57	2.03	5.27	6.95	3.837	16	285	1.91	1.15	1.39	3.69	5.64	1.07	1.62	4.46	17.2	27.2	0.97	0.97	10.1	1	1	1	2	6	1
0	0	65	53.6	0.93	7.21	2.85	3.17	0.21	121.79	1.45	218	132	4.4	0.37	1.79	2.59	4.96	1.396	12	206	1.7	0.9	3.25	3.79	4.75	0.5	0.19	2.09	18.8	31.2	0.96	0.97	11.3	1	2	2	1	12	5
0	1	57	64.8	0.88	8.73	2.35	2.66	0.24	75.85	1.74	223	163	5.18	0.72	2.94	5.13	8.97	3.1	12.26	287.44	2.4231	1.4015	1.4638	5.3857	5.7205	2.2	0.56	3.23	17.8	27.2	0.83	0.84	9.8	2	2	2	2	7	5
0	0	63	61.8	0.92	7.6	2.86	5.99	5.33	112.5	1.92	180	136	4.52	0.3	1.6	3.07	7.61	13.8	14	225	2.59	1.1	2.01	4.6	11.74	2.14	0.35	2	19.4	26.5	0.9	1.03	11.4	2	1	1	2	9	1
0	0	69	75.2918	1.2096	9.372	2.8909	3.86422	0.2	129.02	2.06	409	139	4.76	0.64	3.17	6.54	10.48	5.4	14.7	254	5.63	1.6	2.35	8.3	15.26	1.07	0.24	2.68	18.1	29.8	0.89	0.9	10.5	2	2	1	1	1	5
0	1	72	67.1	1.48	8.05	3.4	4.73	6.84	48.5	0.95	242	76	2.66	0.73	4.99	4.73	4.83	0.5	24.07	266.17	3.03	1.5	0.82	4.9	6.2825	0.36	0.68	4.23	17.7	23.7	1.07	0.96	12.2	2	1	1	2	7	1
0	1	62	68.4	0.91	8.06	2.43	1.11	0.24	76.83	2.23	189	164	5.32	0.58	2.46	5.49	9.15	0.5	15	265	2.54	1.19	1.05	4.63	16.88	1.87	0.23	2.78	17.4	27.8	0.95	0.95	11.1	1	2	1	1	13	3
0	0	92	50.02	0.92	16.77	4.24	6.918	0.19	123.88	2.29	249	142	4.76	0.38	2.01	4.6	7.14	7.8	17	344	1.71	1.05	1.35	3.37	5.85	4.18	1.25	4.1	19.1	27.1	0.94	0.94	11	2	2	2	1	2	1
1	1	67	72.0376	1.0694	8.8171	2.6475	3.664	6.64	84.52	1.57	202	136	4.56	0.36	2.39	3.76	7.22	0.5	27	372	1.26	0.63	1.62	2.63	6.5	2.07	1.25	3.12	17	28.3	0.89	0.91	11.7	1	1	1	2	4	5
0	0	75	66.0623	1.063	8.1145	2.8071	3.43703	0.24	91.75	1.64	178	125	4.26	0.46	1.94	3.19	5.69	0.9	10.84	203	3.56	1.32	0.97	6	5.34	0.8	0.28	2.23	19.2	25.2	1.05	1.05	12.3	2	2	2	1	12	5
0	1	36	50.3	1.03	6.96	2.58	7.48	7.32	75.65	1.72	205	162	5.13	0.37	2.71	4.66	6.83	0.4	27.17	473	2.4805	1.3862	1.7274	4.9613	7.6027	1.87	0.67	3.33	18.8	24	0.92	1	9.9	2	1	1	1	3	2
0	0	61	64.6832	1.0628	8.356	2.7103	3.1787	0.18	102.19	1.36	280	149	4.71	0.49	2.74	3.74	7.08	0.5	9	225	3.46	1.55	2.14	5.84	6.01	0.44	0.2	3.52	17.8	28	0.96	0.96	11.2	2	2	1	1	5	5
0	1	52	5.28	1	12.91	5.35	2.92	2.35	129.13	6.06	164	157	5.02	0.54	1.27	7.69	10.87	80.8	9	280.13	2.11	1.9	3.05	5.4	11.297	0.8	0.18	4	17.9	23.7	0.89	0.88	10.7	2	1	1	2	2	2
0	0	67	73.4	1.39	9.88	2.86	5.22	0.13	130.56	1.25	235	122	4.34	0.24	1.8	2.25	4.57	1.421	10	204	3.43	1.28	1.79	5.52	4.57	0.8	0.52	2.16	17.5	26.3	0.93	0.93	10.9	2	2	2	1	4	1
1	0	86	43.26	0.55	10.14	3.48	63.95	0.52	101.86	5.19	164	157	5.02	0.83	1.61	8.36	10.87	80.8	15.15	227	2.39	1	0.9	3.8	6.21	34.8	11.35	5.44	15.9	29.7	1.07	1.07	12.5	1	1	1	2	7	2
0	0	75	84.4	1.12	15.76	4.89	3.23	0.21	119.67	2.62	146	140	4.82	0.26	1.22	3.2	4.81	3.8	17	254	2.36	1.07	1.35	4.04	7.56	0.94	0.34	2.67	17.8	25.9	0.89	0.89	10.4	2	2	1	2	3	5
0	1	82	73.859	1.0467	9.3638	2.7717	2.61142	0.43	141.74	5.35	163	140	4.38	0.5	1.15	6.15	7.95	3.068	19	390	1.36	1.04	1.26	2.97	5.42	3.95	1.11	2.76	18.4	26.7	0.84	0.85	9.9	2	2	2	1	7	3
0	0	60	79.5	0.92	16.41	4.42	13.216	5.22	87.46	3.77	251	127	4.36	0.55	2.87	10.82	6.43	0.9	14.19	303	1.92	2	1.05	4.4	6.6	0.53	0.19	3.62	17	28.2	0.99	1.09	10.2	2	1	2	2	6	5
0	1	74	59.5	0.89	9.45	2.69	1.74	1.06	169.33	5.43	127	130	4.34	0.71	0.75	4.07	6.48	16.6	25.91	364.97	0.15	1.1	9.12	5.4	6.2775	1.07	0.2	3.53	18	25.9	0.96	1.03	11.6	1	1	2	2	4	5
0	1	76	60.336	1.0153	7.9925	2.831	3.62678	0.14	150.41	2.04	182	100	3.55	0.17	1.21	2.47	3.89	1.3	13.92	194	1.23	1.4	1.37	3.25	8.17	2.7	0.77	1.91	17.9	28.4	0.91	0.91	10.7	2	2	1	2	5	1
0	0	56	54.9	0.97	8.59	2.68	1.29	0.22	103.16	2.7	163	130	4.4	0.34	1.58	4.26	6.32	0.5	14	255	2.17	0.65	1.46	3.65	4.5	0.39	0.19	2.11	16.4	27.8	0.93	0.93	10.9	2	2	1	2	9	1
0	0	47	60.9	0.93	9.41	2.6	2.89	0.24	141.35	2.16	188	158	5.25	0.32	1.33	2.87	4.78	0.5	12.07	270.48	2.3834	1.4408	1.3017	4.7551	9.2656	0.52	0.19	2.03	18.6	27.6	0.91	0.91	10.7	1	2	1	1	4	5
0	0	74	55.5	0.89	8.36	3.19	3.01	0.28	110	1.34	220	118	3.89	0.56	2	2.68	5.3	0.5	14	257	2.3	1.01	1.42	3.96	4.31	1.1	0.27	3.52	18.1	27.1	0.97	0.97	11.4	1	2	2	1	7	3
0	0	62	67.5	1.1	9.1	3.18	4.23	0.18	192.55	1.65	181	121	3.86	0.17	0.94	1.55	2.73	3.5	11	393	2.28	1.09	2.36	4.27	5.09	1.34	0.26	2.35	17.8	25.9	0.95	0.95	11.1	1	2	1	1	6	5
1	0	81	76.3	1.08	9.58	2.83	3.02	5.63	93.33	1.96	126	150	4.89	0.24	1.35	2.64	5.5	6.9	18	486	2.49	0.83	2.3	4.37	6.63	2.67	4.72	2.4	18.2	25.7	1.04	0.97	11.6	2	1	1	1	9	3
0	1	66	88.6	1.26	11.1	2.86	2.58	0.22	91.29	1.4	241	170	5.29	0.59	2.64	3.7	7.08	2.1	15	312	4.16	1.47	1.16	6.15	4.57	2.41	0.69	3.37	17.1	25.5	0.88	0.88	10.3	2	2	2	1	4	4
0	1	69	77.9	1.35	8.87	3.1	11	0.28	104.74	1.85	199	141	4.88	0.53	1.9	3.51	6.11	0.5	17	294	3.94	0.82	2.3	5.81	17.05	0.8	0.39	3.08	17.3	28.5	0.94	0.94	11	2	2	1	2	2	3
0	0	73	67.6327	1.0794	8.4706	2.7892	3.39617	0.15	103.14	1.03	197	136	4.58	0.28	1.91	1.97	4.22	0.5	10	137	1.98	1.19	1.77	3.89	7.59	2.14	0.43	2.05	18.3	25.5	0.83	0.84	9.8	2	2	1	1	6	5
0	1	64	141.3	0.8	25.63	4.68	0.958	0.13	121.33	1.8	256	150	5.33	0.28	2.11	3.79	6.33	1	29	285	2.07	1.25	6.29	4.8	8.89	0.6	0.2	1.88	18.8	26.7	0.96	0.96	11.2	2	2	1	1	4	1
0	1	53	58.8	1.21	7.6	3.25	4.28	0.22	149.71	1.92	262	133	4.78	0.38	1.75	3.36	5.62	0.5	16	318	3.28	1.28	1.7	5.22	4.82	0.53	0.21	1.97	18	25.5	1	1	11.7	2	2	2	1	6	1
1	0	71	6.02	3.98	14.32	4.37	4.1	0.18	93.47	3.63	186	127	4.32	0.36	1.99	7.22	9.66	0.5	9	188	1.61	0.86	4.12	4.34	8.78	8.25	3.08	4.3	18.2	24.4	0.94	0.94	11	1	2	2	1	3	3
0	0	70	57.9	0.7	15.68	3.88	1.12	0.23	107.1	1.94	166	141	4.41	0.35	1.55	3.01	5.13	0.5	15	133	0.94	0.85	2.26	2.82	5.96	1.65	0.36	2.47	18.8	30.8	0.98	0.98	11.5	1	1	1	1	4	5
0	1	68	82.4	1.17	8.62	2.73	1.99	3.21	182.8	5.94	170	166	5.28	0.29	0.93	5.52	7.34	2.7	14.75	331	2.84	1.5	1.01	4.8	7.69	0.94	0.29	3.54	17.3	26.7	0.93	0.89	11.5	2	1	2	2	4	5
0	1	57	68.8497	1.0412	8.7456	2.7397	4.2114	0.21	158.56	1.76	176	137	4.91	0.23	1.11	1.95	3.46	0.5	8	204	1.73	0.83	1.43	3.39	6.62	0.53	0.23	2.23	17.3	29.1	0.89	0.9	10.5	1	2	1	1	4	1
0	0	57	76.6	1.1	9.76	2.9	2.53	0.2	150.75	1.36	303	118	4.49	0.41	2.01	2.73	5.28	0.5	10.24	229	3.44	1.6	3.71	6.94	9.29	1.27	0.27	2.09	17.3	26.5	0.9	0.91	10.6	2	2	1	2	2	4
0	0	60	87.11	1.14	9.11	2.67	1.5	0.25	195.08	3.16	238	124	4.14	0.3	1.22	3.85	5.44	0.5	9	178	2.99	1.23	1.3	4.81	5.58	0.51	0.24	3.25	17.5	27.3	0.9	0.91	10.6	2	2	2	1	9	1
1	0	47	83.4	0.72	10.2	1.32	26.6	9.55	63.1	1.06	265	120	3.97	0.44	4.2	4.47	7.58	2	23	168	3.58	0.8	2.71	5.61	5.46	4.28	1.15	3.05	17.1	27.783	0.99	1.03	8.8	1	1	1	2	1	2
0	0	60	68.3899	1.0672	8.3468	2.6491	2.71216	0.25	195.08	3.16	238	124	4.14	0.3	1.22	3.85	5.44	0.5	9	178	2.99	1.23	1.3	4.81	5.58	0.51	0.24	3.25	17.5	27.3	0.9	0.91	10.6	2	2	2	1	10	1
0	1	64	63.9	1.02	8.9	2.67	4	0.21	140.12	1.59	227	149	4.5	0.34	1.62	2.57	4.71	1	17.56	270	2.03	2	0.81	4.4	6.42	0.27	0.19	2.78	19	30.1	0.97	0.97	11.4	2	2	2	2	2	1
0	0	56	65.6	0.86	8.56	2.93	1.33	0.22	103.16	2.7	163	130	4.4	0.34	1.58	4.26	6.32	0.5	14	255	2.17	0.65	1.46	3.65	4.5	0.39	0.19	2.11	16.4	27.8	0.93	0.93	10.9	2	2	1	2	8	1
0	0	82	58.797	1.1645	6.73	3.07	1.6	0.16	67.29	1.59	181	151	5.44	0.43	2.69	4.28	7.54	0.5	17	239	2.9	0.91	2.47	4.57	6.84	1.6	0.65	2.63	17.7	32.1	0.99	0.99	11.6	2	2	1	1	6	5
1	1	56	84.1	0.9	9.18	2.36	2.13	1.08	198.61	8.03	286	142	4.09	1.55	1.44	11.57	14.64	89.6	15.41	295	1.99	1	1.5	3.67	5.65	4	0.51	4.28	20.5	29.4	0.93	0.93	10.9	1	2	2	1	11	5
0	1	79	66.4335	1.0686	8.1841	2.7544	2.88052	0.4	238.14	7.75	231	131	4.63	0.39	0.97	7.52	9.01	1.9	14	203	4.02	1.08	1.76	5.9	9.91	1.69	0.39	2.63	16.8	23.8	0.83	0.83	9.7	2	2	1	1	6	5
1	1	83	64.8	0.95	7.89	2.53	2.06	0.92	386.11	9.61	139	91	3.07	0.33	0.36	3.46	4.21	76.579	28.43	80	1.78	0.7	2.02	3.4	15.15	12.48	3.08	6.58	15.6	24.1	1	1	11.7	1	2	1	2	6	1
1	1	63	68.405	1.0946	8.4825	2.8401	3.61162	0.36	215.56	5.32	194	136	4.85	0.32	0.9	4.79	6.17	3.3	13.81	273.83	3.48	2.6	1.81	6.9	11.8043	0.8	0.73	1.57	17.1	24	0.88	0.88	10.3	2	2	1	1	2	5
0	0	68	59.5	0.89	7.72	2.32	3.37	0.4	136.59	1.61	112	131	4.25	0.33	0.82	1.32	2.48	5.1	9	165	1.64	1.09	0.75	3.38	7.42	1.07	0.19	2.68	19.4	31.9	1.02	1.02	11.9	2	2	1	1	7	5
0	1	69	71	1.05	6.84	2.53	0.948	0.55	212.2	4.29	261	130	4.4	0.68	1.23	5.28	7.35	4.892	12	263	2.7	1.06	1.5	4.44	4.27	1.34	0.61	3.8	16.6	27.6	1.04	1.03	12.1	1	2	2	2	2	3
0	0	85	51.8	0.88	6.51	2.42	4.64	0.33	165.94	1.62	229	157	5.09	0.46	1.38	2.24	4.14	2.7	19.63	331	1	1.4	1.31	3	7.8	2.14	0.44	3.22	17.5	28.1	0.99	0.99	11.6	2	2	2	1	3	5
0	1	79	70.4186	1.0925	8.7471	2.8195	4.24307	0.2	131.66	1.4	262	144	4.81	0.4	1.99	2.79	5.35	1.465	12.32	279.59	3.03	1.5	0.82	4.9	5.323	2.67	0.68	2.63	18.4	27.8	0.89	0.89	10.4	2	2	2	1	2	5
0	0	74	64.8	0.88	8.73	2.35	2.66	0.14	105.91	2.24	269	133	4.45	0.36	2.54	5.7	8.72	2.005	13.96	385	2.4858	1.3327	1.5593	4.4082	6.2298	1.34	0.43	3.08	17.8	24.2	0.93	0.93	10.9	1	1	2	1	9	2
0	0	51	85.9	1.42	9.86	3.65	2.06	0.27	183.21	3.69	240	161	5.55	0.35	1.31	4.83	6.64	1.5	10	249	2.48	1	1.05	3.96	5.33	1.07	0.18	2.09	17.9	30.9	0.92	0.92	10.8	2	2	1	1	4	5
0	1	59	64.5	0.95	7.89	2.53	2.06	0.24	133.33	1.76	220	144	5.04	0.39	1.65	2.91	5.07	1.5	5	264	2.07	1.28	1.58	4.07	6.55	0.53	0.18	3.29	18.1	27.2	0.97	0.97	11.4	2	2	1	1	2	1
1	1	57	78.4	1.01	9.44	2.42	2	0.34	232.58	3.7	307	152	5.2	0.45	1.32	4.89	6.78	1.3	43	391	2.62	0.75	1.52	4.05	5.73	1.8547	0.4712	3.0971	17.636	28.239	0.9525	0.9494	11.068	2	2	2	2	6	1
0	1	57	57.1	0.89	7.33	2.57	2.74	2.24	92.36	4.87	145	116	3.58	0.7	1.57	7.65	5.16	0.4	9	299	3.46	1.44	2.13	6.07	3.7	0.8	0.44	2.78	15.6	24.9	0.96	1.05	9.5	2	1	1	1	8	5
1	0	79	66.5265	1.0699	6.9322	2.6494	10.9529	0.49	124.35	6.9	143	125	4.3	0.56	1.15	7.93	9.84	0.5	14.36	260	2.33	1.8	1.45	4.79	7.36	1.7	49.35	3.91	17.4	25.7	0.81	0.81	9.5	2	2	2	1	10	5
0	0	69	2.16	2.69	8.79	3.25	13.87	0.23	164.91	3.72	188	169	5.22	0.26	1.14	4.24	5.69	3	17.39	320.29	2.4546	1.4199	4.4867	5.0164	7.7267	2.3	0.65	3.18	16.8	23.4	0.84	0.84	9.8	2	1	2	1	5	2
1	0	77	81.39	1.06	18.95	5.03	4.182	0.49	303.53	3.19	258	135	4.28	0.42	0.85	2.71	4.07	0.5	13	183	1.7	1.04	0.91	3.16	5.05	4.9	1.56	2.86	18.8	29.2	0.93	0.93	10.9	2	2	2	1	10	1
0	0	72	62.11	1.06	19.47	3.78	2.45	0.62	119.17	5.25	230	137	5.61	1.19	1.93	10.13	13.52	8.6	13.02	291.01	2.4435	1.35	1.4037	5.3248	6.9696	1.8	0.39	3.56	17.3	28	1.09	1.09	12.7	1	1	2	2	3	2
0	1	83	69.0982	1.075	8.8421	2.8814	3.44982	0.26	60.39	2.56	186	126	4.09	0.81	3.08	7.87	11.8	15.69	15.42	477	2.3975	1.3155	1.8327	4.7987	9.74	2.67	0.6	2.06	18.2	24.5	0.95	0.95	11.1	1	2	2	1	3	1
0	0	60	84.62	1.06	18.29	4.63	1.486	0.22	60.82	1.44	163	151	4.92	0.59	2.68	3.86	7.28	1.346	10	285	1.57	0.76	3.35	3.85	4.14	3.1	0.19	1.97	18.2	29.9	0.93	0.93	10.9	2	2	1	1	8	3
1	1	70	89.6	0.79	9.49	2.03	2.41	0.48	161.9	6.03	238	130	4.52	0.71	1.47	8.87	11.11	20.168	13	348	1.59	1.8	0.91	3.8	8.84	11.59	4.41	3.62	18.2	23.8	0.95	0.95	11.1	2	2	1	1	8	1
1	1	57	37.6	0.78	7.95	2.2	2.57	0.22	114.43	3.22	230	163	4.5	0.44	2.01	6.47	9.01	1.5	82	442	1.97	1.17	3.19	4.59	4.9	0.8	0.23	2.27	18.1	26.8	0.9	0.91	10.6	2	2	2	1	1	1
1	1	76	69.5	0.93	9.49	2.53	5.47	3.6	107.51	5.32	186	123	4.02	0.48	1.73	9.2	4.1	0.4	27.88	405	1.27	0.6	1.83	2.7	14.35	0.52	0.66	3.15	15.8	27.6	0.96	0.91	12.5	1	2	1	1	12	1
0	0	52	69.1	1.2	8.39	3.46	1.73	0.18	107.97	1.54	271	158	5.31	0.45	2.51	3.87	7.09	0.4	15	316	3.3	1.3	1.02	5.13	6.27	1.2985	0.3553	2.752	17.499	27.674	0.9556	0.9494	11.116	2	2	2	1	13	4
0	1	67	70.3294	1.0773	8.7402	2.8613	3.56579	5.44	86.21	1.19	150	164	5.28	0.32	1.74	2.07	7.6	2.736	13.98	298.5	2.43	1.421	1.3039	5.0107	6.268	2.6	1.93	2.25	18.8	27.419	0.88	0.88	12.3	1	1	2	2	4	5
0	0	80	55.1	0.86	7.12	2.6	1.99	0.29	161.8	3.29	144	121	3.59	0.26	0.89	2.93	4.13	0.5	23.49	309	1.08	1.9	1.37	3.6	8.87	0.53	0.19	1.68	18	30.3	1.01	1.01	11.8	1	2	2	1	5	4
0	0	74	67.7662	1.0721	8.7204	2.7672	3.65576	0.38	26.39	8.89	256	130	4.32	3.7	9.7	86.2	10.51	0.5	9	250	4.67	1.66	1.17	6.86	6.61	1.32	0.29	3.67	17.8	26.2	0.83	0.84	9.8	1	2	1	1	3	1
0	0	50	81.7	1.45	10.3	3.42	4.15	0.21	81.23	2	212	156	5.43	0.55	2.61	5.23	8.7	18.1	17	254	3.32	1.05	1.4	4.95	11.25	1.34	0.34	4.61	14.7	27.5	0.99	0.99	11.6	2	2	2	1	1	4
0	0	78	79.9	1.04	8.72	2.62	2.46	3.27	108.13	3.35	173	157	4.77	0.49	1.6	5.36	7.77	6.2	34.25	418	0.85	1.4	6.49	5.2	7.12	0.45	0.29	3.86	14.5	28.4	1.05	1.01	11.1	2	1	1	1	9	1
0	0	73	64.5442	1.0685	7.8736	2.7542	3.67618	0.21	225.19	1.5	295	131	4.64	0.28	1.31	1.97	3.67	1	9	239	3.99	1.04	2.85	6.59	5.53	0.53	0.39	2	17.6	27.5	1.01	1.01	11.8	2	2	2	1	2	1
0	1	82	52.6	0.84	2.33	2.58	8.33	0.22	114.93	2.02	231	114	3.92	0.45	2.01	4.07	6.83	0.5	26	455	4.84	1.78	6.4	8.71	3.38	1.34	0.64	1.97	18.9	30.8	1	1	11.7	2	2	1	1	4	5
1	1	80	79.1	0.6	10.2	2.06	1.83	0.59	651.79	9.71	365	129	4.54	0.33	0.56	5.44	6.43	144.4	14.63	216	3.01	1.3	1.51	5	7.12	5.51	2.57	6.58	16.7	29.2	1.08	1.08	12.6	2	2	2	1	8	5
0	0	80	8.55	4.17	15.05	5.32	0.5	0.31	74.62	4.05	147	141	4.44	0.62	1.97	7.98	10.58	0.5	14	184	2.53	1.36	0.88	4.3	4.08	2.63	0.57	2.3	19.4	27.2	0.85	0.85	10	1	2	2	2	2	3
0	1	59	71.8	0.87	16.02	5.23	1.95	0.22	133.33	3.34	240	145	4.4	0.39	1.8	6.01	8.31	3.8	14	305	3.07	1.43	1.21	5.05	4.88	1.1	0.19	4.01	17	26.6	0.89	0.89	10.4	2	2	2	1	2	3
0	1	61	72.8	0.92	8.33	2.63	2.51	0.18	102.19	1.36	280	149	4.71	0.49	2.74	3.74	7.08	0.5	11.93	285.48	2.4753	1.3966	1.3091	5.1451	6.8485	0.44	0.2	3.52	17.8	28	0.96	0.96	11.2	2	2	1	1	3	5
0	0	79	67.3411	1.043	8.5447	2.8207	3.93362	0.23	148.48	1.79	196	137	4.27	0.3	1.32	2.36	4.02	1.061	10	220	4.92	1.64	0.64	6.85	5.31	1.51	0.24	2.4	18.3	27	0.95	0.95	11.1	2	2	2	1	3	3
1	1	73	77.1	1.1	9.07	2.73	2.74	0.28	112.23	2.35	211	128	3.88	0.53	1.88	4.42	7	2.284	61	324	4.21	0.95	2.11	6.12	4.5	1.07	0.28	3.22	18.2	27.8	0.95	0.95	11.1	1	2	1	1	2	3
0	1	56	69.4046	1.0779	8.7428	2.7726	2.34174	0.31	130	4.11	247	154	4.69	0.58	1.9	7.81	10.32	1.1	21.68	416	4.43	1.1	1.25	6.1	5.1	1.87	0.22	2.78	17.9	25.7	1.02	1.02	11.9	2	2	2	1	5	5
0	1	67	67.5496	1.0401	8.4034	2.7803	2.6341	2.51	120.98	6.2	173	142	4.5	0.57	1.43	8.86	7.49	10.3	10	137	1.98	1.19	1.77	3.89	7.59	1.07	0.43	2.52	17.4	24.7	1.07	1.01	10.8	2	1	1	1	19	5
0	0	62	93.2	0.89	16.84	4.78	6.354	0.17	137.93	1.92	280	138	4.6	0.35	2.03	3.89	6.46	1.855	13	348	1.97	0.87	1.61	3.57	6.44	1.6	0.34	3.15	16.5	24.6	0.96	0.97	11.3	2	2	1	1	5	4
1	0	86	72.1456	1.0337	8.6589	2.7687	2.70053	0.36	543.18	12.7	239	122	3.77	0.16	0.44	5.59	6.2	5.7	14.04	193	1.96	1.8	0.73	4.09	5.97	10.3	2.71	3.8	18	27.8	0.91	0.91	10.6	2	2	2	2	17	1
0	1	81	76.4	0.7	13.83	3.94	0.352	0.43	218.63	5.01	352	132	4.53	0.69	1.61	8.07	10.42	5.188	11	472	1.9	0.85	1.54	3.49	4.29	2.01	0.46	3.38	18.1	30.2	0.97	0.97	11.4	1	1	2	1	3	2
0	1	47	5.02	4.33	19.52	4.56	4	0.13	64.68	1.28	260	153	4.97	0.51	4.02	5.15	9.8	22.956	12	293	4.32	1.18	4.78	7.67	5.51	2.26	0.19	2.51	17.8	25.2	0.77	0.78	9.1	2	2	2	1	4	1
1	1	46	96.23	0.6	18.48	3.5	3.226	0.36	298.67	4.91	224	76	2.66	0.27	0.75	3.68	4.83	0.5	27.9	91	1.34	0.8	1.71	2.92	11.93	3.5	0.89	1.07	17.8	33.5	0.94	0.94	11	2	2	1	1	11	5
0	0	77	51.2	1.13	7.72	3.11	7.11	0.23	146.92	1.67	310	133	4.34	0.48	2.11	3.53	6.47	1.1	12.53	274.99	3.46	2	1.1854	6.4553	5.7114	1.6	0.37	1.94	19	27.6	0.97	0.96	11.3	1	2	2	1	7	3
0	0	57	52.1	0.95	6.12	2.57	3.02	0.28	196.55	1.81	228	126	3.93	0.33	1.16	2.1	3.65	11.3	17.77	218	2.36	1.6	3.37	4.9301	11.24	0.27	0.19	4.35	16.7	25.5	0.99	0.99	11.6	1	2	2	1	2	5
1	1	72	7.41	6.59	17.38	5.89	0.74	0.21	133.06	4.05	161	138	4.21	0.26	1.21	4.9	6.51	0.5	25	268	1.93	1.45	0.58	3.64	5.26	2.07	0.41	2.27	18	25.2	0.92	0.92	10.8	1	2	2	1	12	3
0	0	76	10.33	0.9	19.74	4.74	0.89	0.2	205.66	3.25	218	125	3.6	0.21	1.06	3.45	4.8	3.3	14.35	258	2.4417	1.3429	1.9963	4.7125	21.33	0.8	0.28	3.08	17.5	25.3	0.93	0.93	10.9	2	2	1	1	3	5
0	1	70	67.0599	1.0628	8.2607	2.7316	3.4183	5.39	98.73	3.19	234	138.32	4.5404	0.44	2.37	7.55	6.0377	13.754	26	468	2.4606	1.2628	1.797	4.3227	5.7798	1.6758	1.31	4.06	17.3	32.84	0.921	1.33	10.7	2	1	1	2	15	1
0	0	68	67.5	0.89	8.76	2.36	3.39	0.22	118.12	2.83	163	125	4.12	0.3	1.38	3.9	5.63	4.4	6	303	2.58	1.41	1.06	5.02	4.54	0.8	0.24	2.41	17.7	26.2	0.93	0.93	10.9	2	1	2	1	2	4
0	0	56	69.3684	1.0274	8.7481	2.8058	3.32232	0.16	93.17	1.98	150	142	4.62	0.25	1.61	3.19	5.19	0.4	12.94	271.25	2.3741	1.3738	1.3518	4.5809	8.3623	0.36	0.24	2.07	18	25.7	0.96	0.96	11.2	2	2	1	1	2	5
0	0	62	68.6721	1.0529	8.8013	2.831	3.46155	1.9901	122.446	2.5996	204.36	140.83	4.599	0.5061	1.6803	4.5241	5.8954	1.845	11	382	1.43	1.18	2.32	3.66	6.55	1.07	0.29	2	21.6	29.9	0.96	0.96	11.2	1	1	2	1	4	2
0	1	61	69.4	1.1	8.68	2.94	1.72	5.38	90	2.61	126	136	4.76	0.26	1.4	3.66	12.16	4.2	14.72	198	2.12	1.3	1.49	4.1	18.42	0	0.43	1.75	16.8	28.1	0.97	0.93	10	2	1	2	1	2	1
1	1	78	72.6873	1.318	8.8126	2.6534	25.6636	1.11	278.08	13.67	203	147	4.8	0.81	0.73	9.98	11.54	2.6	28.06	469	8.36	0.9	2.75	10.51	4.81	2.4	0.74	4.72	16.1	26.2	1.03	1.03	12	2	2	2	1	6	1
0	0	91	59.3	0.82	8.4	2.29	0.456	0.74	180.53	7.57	204	116	3.87	0.84	1.13	8.55	10.62	12.7	26.28	140	0.16	1.5	0.75	2	5.57	2.41	0.77	2.53	17.5	34.4	1.15	1.15	13.4	1	1	2	2	5	5
1	0	74	65	1.02	6.54	2.35	1.79	0.19	120.83	1.35	174	95	2.96	0.27	1.44	1.94	3.78	2.1	34	180	3.32	1.1	1.05	4.9	7.02	1.6	0.42	2.2	17.6	27.5	0.97	0.97	11.4	1	2	1	2	4	5
0	0	71	47.1	0.72	9.47	2.18	1.96	0.23	169.27	2.47	303	147	4.78	0.42	1.79	4.42	6.76	4.8	12.41	304.53	2.5858	1.3817	1.2552	5.0922	5.4519	1.6	0.68	3.71	17.7	30.2	0.92	0.92	10.8	2	2	2	2	8	5
0	0	61	66.9482	1.0192	8.4518	2.7592	2.86716	0.5	163.33	4.48	147	119	3.76	0.45	0.9	4.03	5.57	3.9	12.48	276.32	2.4005	1.4439	1.2336	4.9476	8.9234	0.53	0.2	3.02	18.8	24.4	0.93	0.93	10.9	2	2	1	1	9	5
0	1	53	68.4648	1.0344	8.7833	2.7341	3.43267	0.3	95.68	1.98	177	171	5.75	0.55	1.85	3.66	6.29	0.5	21	281	2.13	0.79	2.03	3.81	10.72	0.53	0.2	1.66	18	29.6	1.01	1.01	11.8	2	2	1	1	6	1
0	0	68	40.5	0.87	6.73	2.06	1.03	2.16	116.91	2.9	159	97	3.38	0.63	1.36	3.95	6.61	8.4	10	204	3.43	1.28	1.79	5.52	4.57	3.48	0.52	3.85	17.5	28.1	0.96	0.97	11.1	2	1	1	1	4	3
0	1	78	58.5	1.04	7.49	3.51	1.95	0.28	50.37	1.79	68	116	3.69	0.38	1.35	2.42	4.26	5.369	14	260	1.82	0.93	1.06	3.23	4.97	0.53	0.35	3.08	17.7	28.1	1.05	1.05	12.3	2	2	2	2	1	1
0	0	78	63.4	1.07	7.84	3.08	8.65	0.23	103.33	1.43	124	110	3.5	0.27	1.2	1.71	3.24	1.2	8	276	2.44	1.35	1.06	4.83	5.49	0.27	0.26	2.31	17.3	31.5	1.01	1.01	11.8	2	2	2	1	2	4
0	0	78	86.1	1.1	9.51	3.02	2.78	0.28	143.94	4.35	190	140	4.57	0.37	1.32	5.74	7.48	6.8	23.6	424	2.21	1.1	3.27	4.8	13.26	1.87	0.53	2.96	18	26.2	1	1	11.7	1	2	1	1	3	5
1	1	79	53.7	0.88	6.66	2.6	2.85	0.24	198.47	6.47	260	135	4.24	0.31	1.31	8.47	10.1	3.6	22.2	338	3.42	1.3	1.05	5.2	9.59	2.67	0.95	3.02	16.7	25.9	1.22	1.21	14.2	2	2	2	1	16	1
0	1	48	68.7	0.61	13.6	3.51	1.33	175	121.71	5.8	213	142	4.09	0.01	1.75	10.15	14.64	89.6	16.38	262	1.17	1.09	0.89	2.9	5.26	3.09	0.69	4.06	17	25.3	0.9	0.91	10.6	2	1	1	1	10	5
0	0	81	69.8	0.87	8.77	2.31	1.49	6.08	93.42	1.32	227	131	4.3	0.4	2.43	3.21	6.39	1.2	7	328	3.13	1.35	1.21	5.27	5.3	1.07	0.49	2.81	17.5	27.091	0.83	1.02	10.7	2	2	1	2	16	1
1	1	73	120	1.21	11.19	2.64	4.15	0.28	112.23	2.35	211	128	3.88	0.53	1.88	4.42	7	2.315	61	324	4.21	0.95	2.11	6.12	4.5	1.07	0.28	3.22	18.2	27.8	0.95	0.95	11.1	1	2	1	1	2	3
0	0	48	68.0473	1.0683	8.4399	2.7332	3.41538	0.7331	124.014	2.5912	210.63	142.78	4.612	0.5115	1.7004	4.5084	6.8673	5.365	15.17	272.44	2.4704	1.3853	1.4543	5.1571	7.2512	0.38	2.24	3.25	17.1	27.5	0.79	0.79	9.3	1	2	1	1	15	3
1	1	62	71.4	0.79	25.06	4.86	1.846	0.44	122.67	4.65	184	141	4.56	0.66	1.5	6.97	9.83	3.726	9	290	2.35	0.98	1.79	4.14	4.3	3.1755	1.1006	3.2735	17.709	27.317	0.9571	0.9559	11.079	2	2	2	1	13	3
0	0	64	67	0.89	8.91	2.35	0.999	0.22	166.49	1.75	318	133	4.56	0.42	1.91	3.35	5.83	5	8	175	3.34	0.95	1.97	5.19	8.38	1.1	0.1	4.35	17.7	27.6	1	1	11.7	2	2	1	1	3	3
0	1	58	64.8462	1.1136	8.1779	2.5916	3.65879	0.21	100	1.94	192	141	4.67	0.4	1.92	3.72	6.2	0.5	8	276	2.84	0.66	4.82	5.69	4.31	2.63	0.28	3.83	16.5	26.1	0.82	0.82	9.6	2	2	1	2	9	3
0	1	72	72.7	1.24	8.11	2.99	1.55	4.65	53.64	2.38	177	145	4.4	0.71	3.3	7.86	8.31	3.8	16	282.73	1.9	0.99	1.12	3.4	6.72	0.27	0.22	3.65	17.763	26.2	0.89	0.93	11.5	2	2	1	2	6	1
0	1	77	71.4784	1.0786	8.7458	2.782	3.66286	8.47	63.35	1.48	204	119	3.76	0.38	3.22	4.78	5.57	3.9	13	262	2.93	1.05	1.12	4.49	6.1	6	0.41	2.95	16.8	30.3	0.85	0.81	12.2	2	1	1	2	9	2
0	1	71	68.7	0.61	13.6	3.51	1.33	0.22	104.55	2.38	184	154	4.99	0.38	1.76	4.19	6.41	3	19.72	485	4.46	1.2	1.54	6.36	5.94	6	0.77	2.86	17.5	29.2	0.94	0.94	11	1	2	2	1	3	3
0	1	64	62.4	1.05	18.95	5.03	1.27	0.26	108.72	2.98	162	153	4.99	0.39	1.49	4.44	6.67	1.5	17	407	2.37	0.83	1.69	3.97	4.43	2.19	0.47	2.86	17.9	29.8	0.92	0.92	10.8	2	2	2	1	2	1
0	0	87	69.8501	1.0749	8.4498	2.7861	3.21392	1.99	141.03	2.52	275	126	3.93	0.98	1.95	4.91	3.65	11.3	12	224	3.04	1.39	1.02	5.19	5.12	1.6	0.61	3.61	18.2	25.2	0.96	0.88	10.7	2	1	1	2	4	3
1	1	67	68.9484	1.0476	8.6735	2.7534	3.02775	0.8061	122.992	3.4205	206.48	164	5.32	0.5446	1.6971	5.7307	9.15	0.5	8	250	2.53	0.94	0.88	3.84	6.62	0.53	0.28	3.3504	16.1	26.1	0.98	1.01	11.676	2	2	1	1	16	5
0	0	83	65.4	1.09	7.62	2.69	3.55	0.26	126.74	3.62	218	140	4.66	0.44	1.72	6.22	8.45	0.5	14.27	299	2.89	0.9	3.98	5.6	14.38	1.87	0.48	2.73	18.2	27.8	0.92	0.92	10.8	2	2	1	1	2	5
0	1	54	93.5	0.97	21.73	4.53	2.276	0.28	277.98	6.94	303	155	4.95	0.3	1.09	7.56	8.99	2.3	11.47	250	2.93	1.4	0.81	4.7	6.41	1.07	0.25	2	16.6	24.7	0.91	0.91	10.7	2	2	2	1	3	3
0	1	85	58.2	0.83	58.2	0.83	9.86	0.36	88.89	2.52	184	140	4.5	0.74	2.07	5.21	8.2	3.6	12	221	2.29	1.57	0.8	4.37	4.47	5.94	1.56	2.03	16.4	34.9	0.98	0.98	11.5	2	2	2	2	3	5
1	0	86	59.8949	1.0538	8.2525	2.6683	3.70138	0.2	77.32	2.56	150	73	2.1	0.38	1.94	4.97	8.44	37.6	19.53	552	1.41	1.7	1.24	3.67	9.19	7.7	2.05	4.89	16	28.2	0.91	0.91	10.7	1	2	1	1	10	3
1	1	71	70.7378	1.073	8.6444	2.7625	2.89289	0.6	375.47	14.43	199	164	5.36	0.32	0.53	7.65	8.52	1	11	219	4.38	1.29	1.03	6.14	8.33	1.88	0.42	3.52	17.3	23.8	0.92	0.92	10.8	2	2	2	1	9	5
1	1	61	66.2	1.0651	8.3108	2.6901	2.78937	0.58	206.25	6.39	198	133	4.2	0.56	0.96	6.13	7.73	73.2	14.49	348	2.91	1.9	2.46	5.9	7.88	3.1	0.55	6.13	16.1	24.3	0.84	0.85	9.9	2	2	2	1	15	5
0	1	66	82.4	1.17	8.58	2.59	2.23	4.08	47.14	2.02	206	154	5.1	1.07	4.37	8.84	6.9	0.4	5	264	2.07	1.28	1.58	4.07	6.55	12.92	0.18	2.11	18.3	27.8	0.89	1.08	10	2	1	1	2	23	1
0	0	84	82.9	1.11	9.21	2.72	2.56	5.74	139.29	2.48	312	146	4.62	0.39	2.24	5.55	6.8	1.2	9	303	3.04	1.31	1	4.8	4.67	1.34	0.19	4.59	17.8	24.7	0.95	1.03	10.5	2	1	1	1	10	1
0	0	74	71.82	1.17	15.75	4.36	2.37	0.28	110	1.34	220	118	3.89	0.56	2	2.68	5.3	0.5	14	257	2.3	1.01	1.42	3.96	4.31	1.1	0.27	3.52	18.1	27.1	0.97	0.97	11.4	1	2	2	1	3	3
0	1	77	59.5	0.89	9.45	2.69	1.74	0.3	159.79	4.08	155	121	4.15	0.29	0.97	3.96	5.3	2.1	22	130	1.27	1.27	0.67	2.84	10.77	0.54	0.18	2.13	17.6	26.4	1	1	11.7	1	2	1	1	1	1
0	0	53	67.808	1.0613	8.3957	2.7514	3.45908	4.57	133.73	1.76	226	131	4.25	0.37	1.69	2.97	2.48	5.1	8	204	1.73	0.83	1.43	3.39	6.62	1.07	0.23	2.76	17.4	25.5	0.96	1.05	10.3	1	1	1	1	3	3
0	0	82	7.44	1.66	11.52	5.55	6.4	0.32	157.58	3.01	156	129	4.26	0.32	1.21	3.79	5.61	1.2	15	278	2.67	0.74	1.44	4.01	5.93	2.14	1.01	2.58	16.8	28.3	1.04	1.03	12.1	2	1	1	1	1	5
1	0	80	70.8964	1.0508	8.7878	2.7599	3.11295	0.44	156.39	6.11	208	117	3.89	0.58	1.33	8.12	10.17	2.1	20.74	480	3.62	1.1	1.2	5.27	9.41	12	2.94	2.69	17.6	25.4	0.92	0.92	10.8	2	2	2	1	24	1
0	0	85	82.11	1.17	8.52	2.82	1.95	0.21	120.33	2.21	219	124	3.96	0.38	1.82	4.02	6.34	0.4	13	337	3.22	1.76	1.2	5.53	6.1	2.41	0.58	2.5	19	24.6	0.93	0.93	10.9	2	2	2	1	7	5
0	1	82	59.5	0.89	7.72	2.32	3.37	3.5	115.13	5.82	137	121	3.77	0.34	1.19	6.93	11.98	83.5	12.89	205	2.28	1.8	0.93	4.5	12.69	1.34	1.15	4.03	19.3	29.5	0.95	0.96	12.3	2	2	1	2	5	5
0	1	56	75.6	1.24	18.2	4.46	1.333	3.28	81.48	1.88	198	110	3.62	0.74	2.43	4.57	5.74	3.335	14.29	194	1.23	1.4	1.37	3.25	8.17	2.19	0.77	3.9	16.5	23.9	0.99	1.03	10.4	2	1	2	2	5	5
0	0	86	67	1.08	8.35	2.66	6.27	0.3	168.07	3.17	279	119	4.04	0.5	1.66	5.26	7.54	2.2	24.69	454	1.47	1.2	2.93	4	6.14	1.34	0.36	2.84	16.4	26.6	0.96	0.96	11.2	2	2	2	1	4	5
0	1	64	57.6	1.04	7.47	2.79	8.81	0.24	96.24	1.81	179	139	4.39	0.44	1.86	3.36	5.83	2	15	321	1.01	0.85	2.31	2.35	4.45	0.53	1.82	1.44	18.4	32.8	1.03	1.03	12	1	2	2	1	4	1
1	1	77	63.5	0.91	8.2	2.33	1.75	0.31	299.22	2.28	386	118	4.05	0.4	1.29	2.94	4.64	0.9	22	349	5.42	1.15	1.14	7.08	6.73	2.91	0.94	4.9	16.3	26.7	0.95	0.95	11.1	2	2	2	2	13	3
0	1	82	57.9	0.7	15.68	3.88	1.12	1.81	83.12	4.71	128	118	4.05	0.85	1.54	7.26	4.64	0.9	16.12	318	3.33	2.1	1.84	6.27	6.1	1.1	0.33	3.78	18.7	25.8	0.87	0.89	12	1	2	1	1	13	1
0	1	57	53.1	0.96	9.05	3.02	3.16	0.4364	125.093	2.5833	206.46	140.86	4.5301	0.5101	1.672	4.474	6.8902	5.915	27.34	346.06	0.15	1.1	9.12	5.4	8.9319	0.27	0.2	2.27	19.5	27.9	0.93	0.93	10.9	1	2	1	1	1	3
1	1	46	40.5	0.87	6.73	2.06	1.03	0.36	298.67	4.91	224	76	2.66	0.27	0.75	3.68	4.83	0.5	32.13	91	1.34	0.8	1.71	2.92	11.93	3.5	0.89	1.07	17.8	33.5	0.94	0.94	11	2	2	1	1	34	5
0	1	46	70.4444	1.0953	8.6243	2.7955	2.54023	0.19	109.61	1.65	251	153	5.17	0.43	2.29	3.78	6.74	3.1	11.65	271.72	2.4651	1.327	1.394	4.3969	7.6498	1.87	0.21	2.31	17.3	27.2	0.87	0.87	10.2	2	2	1	2	2	5
1	0	66	54.3	0.94	7.15	2.36	1.21	0.92	395.16	9.18	245	154	4.98	0.57	0.62	5.69	6.93	3	11	361.51	0.95	1.37	5.81	4.96	7.3465	1.34	0.39	2.68	17.2	26.1	0.91	0.91	10.7	2	2	2	1	3	1
0	0	76	77.3	0.88	9.8	2.64	2.04	0.2	191.75	6.15	186	115	3.59	0.19	0.97	5.97	7.14	0.4	19.06	332	2.83	2.2	1.26	5.6	7.13	5.51	1.89	2.13	17.8	27.5	0.99	0.99	11.6	1	1	2	1	5	2
0	0	55	8.24	5.17	12.89	5.11	1.72	0.29	108.99	3.01	206	131	4.52	0.54	1.89	5.68	8.24	0.9	8	167	2.91	1.04	0.81	4.32	5.3	0.8	0.22	3.23	17.2	30.6	0.88	0.88	10.3	2	2	2	1	3	3
0	1	82	67.2	1.17	9.03	3.27	4.67	0.18	104.41	3.22	237	122	4.02	0.41	2.27	7.3	10.02	0.5	12.2	272.83	2.4408	1.3702	1.5511	4.7075	7.3409	6	1.93	3.56	17.4	23.9	0.81	0.81	9.5	1	2	2	2	3	5
0	0	86	70.4272	1.0748	8.6554	2.75	3.32539	6.06	78.99	1.32	297	135	4.12	0.62	3.76	4.96	4.71	3.2	15	265	2.54	1.19	1.05	4.63	16.88	5.3	0.23	4.23	72.8	24.6	1.04	0.95	10.4	1	2	1	2	10	1

## Sheet: Trainingset data
Target	SEX	AGE	T4	T3	FT4	FT3	TSH	MLR	PLR	NLR	PLT	HGB	RBC	MON	LYM	NEU	WBC	CRP	HCY	UA	LDLC	HDLC	TG	CHOL	GLU	FDP	DDIMER	FBG	TT	APTT	INR	PTR	PT	CHD	AF	T2MD	HBP	NIHSS	TOAST
0	1	77	71.97	1.0322	8.8788	2.8245	3.73555	0.25	128.21	2.32	150	124	3.66	0.29	1.17	2.72	4.22	2.117	9	204	1.72	1.4	0.45	3.33	5.84	1.32	0.39	1.92	17.7	23.9	0.83	0.83	9.7	2	2	2	2	3	1
0	0	79	62.7	0.82	16.31	4.33	1.89	0.24	152.67	3.63	200	138	72.8	0.31	1.31	4.75	6.53	1.3	14	298	3	1.11	2.51	5.25	5.9	2.55	0.84	3.13	17.3	29.5	0.96	0.97	11.3	1	2	2	2	9	1
0	0	47	52.4	0.94	7.82	2.97	3.64	0.2889	122.875	2.5352	206.99	140.4	4.5217	0.512	1.7016	4.455	6.9285	1.386	11	334	2.94	1.22	1.98	4.83	4.91	1.0873	0.3718	2.727	17.728	27.712	0.9511	0.9502	11.099	2	2	2	1	3	1
0	1	62	84.7	1.03	9.06	2.83	5.64	0.22	133.97	2.5	209	145	4.33	0.34	1.56	3.9	5.96	2.1	11	326	2.01	1.28	0.86	3.68	6.16	0.94	0.19	2.59	17.7	25.9	0.91	0.91	10.7	2	2	2	1	2	1
0	1	77	61.4	1.21	7.61	3.15	3.22	1.86	285.26	9.46	271	125	4.26	0.51	0.95	8.99	5.69	0.9	14	201	1.68	1.15	0.74	3.47	6.94	5.3	0.31	2.99	17.007	21.8	0.95	1.03	12	2	2	1	2	11	5
0	0	77	79.3	0.96	9.13	2.63	1.58	0.12	73.86	1.45	178	152	5.23	0.3	2.41	3.5	6.46	0.6	11	251	2.19	1.01	1.4	4.1	7.85	1.34	0.42	2	18.6	27.5	0.98	0.98	11.5	2	2	1	1	2	5
1	0	81	71.8	0.87	16.02	5.23	1.95	6.27	65.25	2.34	184	124	4.06	0.45	2.82	6.6	7.31	0.5	15	133	0.94	0.85	2.26	2.82	5.96	5.41	0.36	4.31	17.1	26.5	0.96	0.93	11.2	1	1	2	2	3	1
0	1	74	60.9	1.12	14.9	4.91	1.83	0.39	178.74	2.68	227	124	63.4	0.49	1.27	3.4	5.36	3	16	196	2.25	0.87	1.05	3.6	3.72	5.41	1.74	2.44	17	24.8	0.93	0.93	10.9	2	2	1	2	5	5
0	1	79	87.4	1.31	9.72	3.49	4.39	0.23	117.47	2.19	195	137	4.5	0.39	1.66	3.63	5.74	0.4	10	330	1.93	1.27	1.14	3.96	8.01	1.6	0.44	2.63	16.7	25.8	1.04	1.03	12.1	2	2	1	1	0	3
1	0	66	67.6	1.07	8.02	3.06	2.25	0.92	395.16	9.18	245	154	4.98	0.57	0.62	5.69	6.93	3	11	359.5	0.95	1.37	5.81	4.96	7.1442	1.34	0.39	2.68	17.2	26.1	0.91	0.91	10.7	2	2	2	1	3	1
0	0	80	64.5901	1.0995	8.0458	2.7064	3.31756	0.22	127.94	2.11	261	133	4.37	0.45	2.04	4.3	7.11	2.4	9	299	3.46	1.44	2.13	6.07	3.7	1.07	0.44	3.53	17.1	25.4	1.01	1.01	11.8	2	2	2	1	5	5
0	0	53	58	0.89	7.75	2.33	1.72	0.29	119.1	2.83	237	148	4.84	0.57	1.99	5.63	8.25	1.8	13.95	183	2.4245	1.4157	1.69	5.0815	11.1781	0.8	0.18	1.94	18.1	21.9	0.85	0.85	10	2	2	1	1	2	5
1	1	71	76.6	1.1	9.76	2.9	2.53	2.65	259.02	12.02	158	145	4.9	0.23	0.61	7.33	8.61	3.2	16.08	260	4.36	1.6	1.62	6.7	17.6	2.67	0.26	2.76	18.189	25.4	1.03	0.96	11	2	1	1	2	17	5
1	1	77	67.9799	1.0473	8.4896	2.676	2.42366	0.57	190.27	5.17	215	129	4.18	0.64	1.13	5.84	7.7	88.4	12.69	262.02	2.4472	1.4001	1.1945	5.2996	7.5721	3.6	1.13	6.13	15.4	25.1	0.91	0.91	10.7	2	2	2	2	13	3
1	1	37	63.2942	1.0609	7.9285	2.7162	3.35277	3.26	123.83	4.56	291	105	3.39	0.72	2.35	10.72	6.96	1.3	11	219	4.38	1.29	1.03	6.14	8.33	2.26	0.42	3.9	17.7	23.8	0.9	1	10.6	2	1	2	1	4	1
0	1	97	59.8	0.9	7.42	2.55	2.6	0.44	120.81	1.93	209	104	3.57	0.76	1.73	3.34	6.11	0.7	14	201	1.68	1.15	0.74	3.47	6.94	2.94	0.31	1.94	17.9	28.2	0.99	0.99	11.6	2	2	1	1	4	5
1	1	67	76.3	1.08	9.58	2.83	3.02	0.5	169.05	4.74	142	140	4.51	0.42	0.84	3.98	5.33	5.7	66	600	0.91	0.49	5.37	3.84	5.07	0.8	0.3	2.73	17.3	28.1	1.08	1.08	12.6	2	2	2	2	5	3
0	1	74	8	3.53	56.3	16.83	1.76	0.31	204.17	4.6	294	133	4.25	0.45	1.44	6.63	8.57	10.2	14	129	3.8	1.87	0.94	6.1	5.52	1.69	0.36	4.2	16.7	24.6	0.82	0.82	9.6	2	2	2	1	4	3
0	0	53	73.4	1.39	9.88	2.86	5.22	0.29	119.1	2.83	237	148	4.84	0.57	1.99	5.63	8.25	1.8	10.34	183	2.4092	1.4146	1.6629	5.1194	11.0369	0.8	0.18	1.94	18.1	21.9	0.85	0.85	10	2	2	1	1	2	5
0	1	62	76.5	0.89	9.1	2.51	1.84	2.48	73.15	5.64	109	123	4.07	0.6	1.49	8.4	7.18	2.7	7	290	2.95	1.12	1.35	5.14	4.24	0.47	9.25	3.49	16.7	32.7	1.05	0.97	12.6	2	1	1	2	10	3
0	1	64	66	1.06	7.92	2.75	2.39	0.16	111.11	2.31	130	122	4.18	0.19	1.17	2.7	4.15	0.5	20	318	2.24	0.73	1.74	3.58	4.49	1.07	0.25	2.31	17.2	30.2	1.05	1.05	12.3	2	2	2	1	1	5
0	1	79	72.8713	1.0183	8.747	2.7104	3.22626	0.57	118.95	3.36	113	155	4.85	0.54	0.95	3.19	4.74	12.1	16	370	1.87	0.85	1.24	3.29	5.33	3.2	0.72	3.75	17.6	23.7	0.9	0.9	10.5	2	2	2	1	2	1
1	1	68	7.3351	22.8817	8.6332	2.796	3.06619	0.33	348.61	20.46	251	151	5.47	0.24	0.72	14.73	15.7	0.8	15.53	285	3.73	1.1	0.82	5.2	11.31	1.1	0.23	3.64	16.6	23.8	0.85	0.85	9.9	2	2	1	1	5	4
0	0	55	67.5	1.14	8.37	2.61	6.66	0.18	89.81	1.69	238	136	4.67	0.48	2.65	4.49	7.82	0.5	8	344	3.21	0.95	3.5	5.75	4.91	1.07	0.67	1.83	17.2	25.2	0.99	0.99	11.6	2	2	2	1	3	5
0	1	43	81.35	1.2	15.99	4.48	2.03	0.26	121.85	3.89	184	147	4.91	0.4	1.51	5.88	7.85	2.8	18	252	3.12	1.03	2.04	5.08	7.48	1.47	0.33	2.47	19.2	25.9	0.97	0.97	11.4	2	2	2	1	3	3
0	1	80	76.5	0.89	9.1	2.51	1.84	0.33	132.63	6.28	126	166	5.28	0.31	0.95	5.97	7.34	2.7	18.79	225	2.59	1.1	2.01	4.6	11.74	0.53	0.35	2.96	15.4	29.8	1.1	1.09	12.8	2	2	1	2	4	1
0	1	70	82.1	1.02	9.97	2.79	2.51	5.56	73.73	1.83	160	131	4.61	0.39	2.17	3.97	5.9	0.4	18.81	377	2.4104	1.3779	1.8097	4.9563	9.61	11.59	1.27	4.17	19.5	29	0.82	0.95	10.7	1	1	1	2	2	3
0	1	83	39.6	0.74	7.12	2.55	4.62	0.33	149.28	2.16	206	124	4.01	0.46	1.38	2.98	4.99	14.2	19	491	1.89	1.15	0.81	3.41	4.35	2.14	0.62	3.53	16.6	29.6	1.1	1.09	12.8	2	2	2	1	2	1
0	1	71	36.1	0.85	7.18	2.65	3.91	3.4	125.87	1.66	180	137	4.91	0.42	1.43	2.37	3.46	0.5	19.53	261	1.26	1.1	2.28	3.4	15.96	5.51	0.42	2.86	17.6	27.9	1.04	1.08	11	1	1	1	2	12	1
0	0	74	7.49	0.85	15.3641	4.49	1.1	0.33	107.63	3.09	127	163	4.92	0.39	1.18	3.65	5.34	0.4	17	324	2.63	1.06	1.4	4.33	4.55	2.41	0.51	2.23	17.8	26.1	1.04	1.03	12.1	2	2	2	1	6	5
0	0	74	72.8	0.92	8.33	2.63	2.51	0.14	120	3.14	168	145	4.78	0.2	1.4	4.39	6.07	2.435	12.95	249	2.4402	1.4121	1.9909	5.0131	34.33	2.94	0.52	2	19.8	26.8	0.92	0.92	10.8	2	2	1	1	10	1
0	0	82	66.5	0.4	8.3	2.2	1.81	0.35	104.96	3.13	127	126	4.23	0.42	1.21	3.79	5.61	1.2	15	278	2.67	0.74	1.44	4.01	5.93	2.14	1.01	2.58	16.8	28.3	1.04	1.03	12.1	2	1	1	1	4	5
1	1	79	64.4355	1.0645	8.0981	2.8927	3.43878	0.38	56.25	1.27	99	120	3.47	0.66	1.76	2.23	4.69	25.7	14.5	263.03	2.4069	1.3869	1.3147	5.6077	5.7591	0.44	0.38	4.78	15.4	26.6	0.97	0.97	11.4	2	2	2	2	5	5
0	0	78	68.3785	1.0623	8.4608	2.7095	2.7393	2.8	153.49	4.52	198	152	4.79	0.46	1.29	5.83	7	2.642	15.06	262	4.94	1.1	1.13	6.55	8.13	1.47	0.7	3.57	17.1	27	0.91	0.97	11.4	2	1	1	2	24	5
1	1	81	84.9	0.72	18.02	4.01	2.64	0.17	76.16	2.15	131	121	4.11	0.29	1.72	3.7	6.06	2.7	28	384	3.85	1.06	1.73	5.69	6.24	2.73	0.81	3.13	18.1	27.5	0.95	0.95	11.1	1	2	1	1	5	1
0	0	73	69.5	0.89	9.06	2.57	3.26	0.18	71.15	1.28	111	117	3.75	0.28	1.56	2	3.97	0.5	9	286	2.07	1.3	0.61	3.65	4.97	1.07	0.19	1.96	15.9	29.9	1.1	1.1	12.9	2	1	2	2	8	2
0	1	85	69.5227	1.0411	8.6121	2.9137	2.6705	0.7	535.09	6.3	305	136	4.52	0.4	0.57	3.59	4.71	2.1	13	262	2.93	1.05	1.12	4.49	6.1	1.51	0.41	2.76	17	27.4	0.95	0.95	11.1	2	2	1	2	4	1
0	0	89	79.5	1.05	9.53	3.07	2.42	0.37	247.17	3.32	262	126	4.36	0.39	1.06	3.52	5.14	1.2	13.27	147	2.98	2.2	1.15	5.7	6.42	1.6	0.24	2.78	17.2	28.1	1	1	11.7	2	2	2	1	5	4
1	0	70	56	1.02	8.63	2.94	2.51	4.65	185.47	3.84	319	150	4.7	0.37	1.72	6.6	6.99	2	20	318	2.24	0.73	1.74	3.58	4.49	1.87	0.25	3.15	16.8	25.5	0.99	0.95	9.2	2	1	1	2	3	1
0	1	81	88.8	1.35	9.89	2.59	2.66	0.43	218.63	5.01	352	132	4.53	0.69	1.61	8.07	10.42	5.071	11	472	1.9	0.85	1.54	3.49	4.29	2.01	0.46	3.38	18.1	30.2	0.97	0.97	11.4	1	1	2	1	4	2
0	0	76	73.5	0.74	8.25	1.94	5.62	0.2	211.11	2.86	228	127	4.12	0.22	1.08	3.09	4.42	11.6	12	138	2.64	1.13	1.32	4.37	11.14	2.41	0.75	3.71	16	25	1.02	1.02	11.9	2	2	2	2	3	5
0	1	61	69.5	0.93	9.49	2.53	5.47	0.14	64.41	1.71	190	145	4.9	0.41	2.95	5.04	8.61	3.2	9	206	1.61	0.73	1.5	3.23	9.93	0.45	0.19	2.09	17.5	29.3	1.01	1.01	11.8	2	2	1	1	5.67	3
0	1	59	62.05	0.82	19.87	4.21	1.538	3.07	163.83	5.13	231	105	3.8	0.46	1.41	7.24	7.52	5.3	12.61	276.77	2.4312	1.4975	1.2035	4.9027	16.5169	1.1	0.4991	3.36	20.5	25.7	0.94	0.97	11.9	2	1	1	1	7	3
0	1	60	68.6392	1.048	8.6085	2.72	3.15967	1.89	125	3.52	130	149	4.74	0.55	1.04	3.66	4.58	0.4	7	294	3.06	1.05	1.9	4.97	5.33	2.94	0.67	3.15	17	30.8	1	0.99	11.6	2	1	1	1	5	5
0	1	64	57	0.88	2.41	0.52	0.856	0.38	113.53	4.04	193	157	5.33	0.64	1.7	6.87	9.43	3.2	17	591	2.85	1.02	2.16	4.87	6.33	0.27	0.31	3.22	17.1	28.1	1.02	1.02	11.9	2	2	2	1	4	1
0	0	70	82.1	1.02	9.97	2.79	2.51	3.13	150.4	8.2	188	144	5.04	0.4	1.25	10.25	5.07	1.5	12	263	2.7	1.06	1.5	4.44	4.27	2.94	0.61	3.12	17.9	31	1.02	1	10.6	1	1	2	2	10	1
1	1	72	74.9341	1.0411	9.3479	2.8066	3.09503	0.37	218.6	10.1	188	153	4.95	0.32	0.86	8.69	9.88	2.1	16.64	286	1.41	0.89	0.79	2.64	6.11	2.8	0.72	2.53	17.5	25.3	0.89	0.89	10.4	2	2	2	1	22	1
0	0	78	106.8	1.34	18.15	5.01	3.004	0.28	85.14	3.21	126	145	5.01	0.42	1.48	4.75	6.71	1.4	16.39	280	1.25	1.2	1	2.9	6.63	1.34	0.8	2.63	17.3	27.2	0.96	0.96	11.2	2	2	2	1	7	3
0	1	57	5.49	6.31	19.09	4.46	0.84	0.25	88.94	1.89	209	153	4.74	0.58	2.35	4.43	7.67	0.5	13.45	303.98	2.412	1.3948	1.7473	5.218	10.2107	0.6	0.19	3.06	17.9	24.6	0.79	0.79	9.2	2	2	1	1	3	3
0	0	52	113.2	0.96	18.32	4.67	1.39	0.17	51.22	2.4	105	157	5.22	0.34	2.05	4.93	7.34	2.2	11	301	4.06	1.85	0.91	6.33	8.98	0.74	0.19	3.02	18.3	25.5	0.81	0.81	9.5	2	2	1	1	3	5
0	1	74	6.87	6.06	15.34	4.95	1.27	0.24	93.75	2.05	180	132	4.24	0.46	1.92	3.94	6.47	0.5	11	220	0.91	0.69	0.88	2	4.61	1.32	0.3	2.27	17.5	28.1	0.99	0.99	11.6	1	2	1	1	6	1
1	0	66	72.9	1.05	9.15	2.4	7.03	0.17	133.33	1.99	224	145	4.78	0.28	1.68	3.34	5.69	2	12	215	3.26	1.22	2.12	5.44	4.55	21.17	9.76	2.73	15.7	27.2	0.96	0.97	11.3	2	2	2	1	2	3
0	0	92	72.7	1.24	8.11	2.99	1.55	0.29	86.98	2.13	167	162	5.13	0.56	1.92	4.09	6.83	0.4	18	297	3.61	1.09	1.46	5.36	5.57	1.6	0.37	3.15	17.2	29	1.04	1.04	12.2	2	2	2	2	3	3
0	0	76	59.7	1.08	7.52	2.89	6.14	0.25	155.88	1.58	265	120	3.91	0.43	1.7	2.69	4.89	0.5	12.14	269.96	2.5526	1.3572	1.3435	4.758	5.5851	1.87	0.58	1.77	17	24.9	0.94	0.94	11	1	2	2	1	4	5
0	0	80	67.9964	1.1011	8.4525	2.8604	3.22552	0.25	80.29	2.28	220	137	4.57	0.69	2.74	6.24	9.83	4.4	12.83	341	2.74	1.6	2.55	5.5	5.88	3.4	0.92	2.57	18.7	26.5	0.92	0.92	10.8	1	2	2	1	9	1
1	0	49	7.3457	20.6657	8.5101	2.7717	3.24307	0.6	262.77	16.23	247	146	5.08	0.56	0.94	15.26	16.8	2.9	14.84	198	2.84	1.4	0.7	4.56	17.42	2.3	0.89	3.12	17.3	21.8	0.88	0.88	10.3	1	2	1	1	13	5
1	1	50	76.33	1.05	14.47	5.65	2.941	2.34	112.67	3.81	169	137	4.27	0.64	1.5	5.71	4.02	2.893	9	395	2.74	0.83	3.19	5.02	10.81	3.5	0.44	3.3	17.1	29.4	0.93	0.94	10.1	2	1	1	2	0	3
0	0	51	60.6	0.89	8.18	2.48	2.46	6.95	136.74	1.81	361	119	3.68	0.38	2.64	4.77	5.26	1.2	23	317	2.49	1.46	2.56	4.83	7.16	3.21	0.22	4.34	16.7	26.5	0.97	1.1	9.7	2	1	2	2	3	1
0	0	57	61.8	0.92	7.6	2.86	5.99	0.15	106.34	1.41	151	136	4.05	0.22	1.42	2	3.85	4.4	11	331	2.71	1.06	1.63	4.38	5.55	0.47	0.24	2	16.7	30.3	0.97	0.97	11.4	2	2	2	2	4	5
1	0	69	96.8	0.97	11.19	2.59	11	0.12	100.64	1.56	315	109	3.59	0.36	3.13	4.88	8.5	2.246	12	240	6.51	1.71	1.41	8.86	7.04	2.14	1.34	3.29	17.4	28.9	0.93	0.93	10.9	2	2	1	1	5	1
1	0	82	66.5	0.94	13.22	3.59	1.186	0.19	144.81	2.56	265	111	3.51	0.35	1.83	4.68	6.93	3.4	40	403	1.08	1.13	0.92	2.63	3.74	2.73	1.07	3.25	16.2	27.9	1.04	1.03	12.1	1	2	1	1	18	3
0	1	78	67.666	1.0595	8.5823	2.7814	3.54624	0.21	89.57	2.25	146	110	3.62	0.35	1.63	3.66	5.74	1.884	13	295	1.59	1.03	1.17	3.15	4.7	2.26	0.4	2.96	16.9	26.9	1	1	11.7	1	2	2	1	2	5
0	1	46	106.8	1.34	18.15	5.01	3.004	4.41	53.53	2.56	144	135	4.21	0.61	2.69	6.88	7.91	4.9	9	165	1.64	1.09	0.75	3.38	7.42	0.53	0.19	3.57	19.2	36.1	1.01	0.98	9.9	2	1	1	1	11	5
0	1	50	70.6	1.3	8.74	3.17	3.21	0.18	91.58	2.06	185	158	6.08	0.37	2.02	4.17	6.67	2.604	16	451	2.51	0.73	2.08	4.19	5.1	0	0.19	2.44	17.7	28.6	0.9	0.91	10.6	2	2	2	1	16	3
0	1	52	79.1	0.6	10.2	2.06	1.83	3.39	128.06	4.33	178	119	3.65	0.41	1.39	6.02	7.02	3.2	10	296	2	1.16	1.48	4.16	7.41	0.53	0.35	2.59	17.7	30.6	0.937	0.93	10	2	1	1	2	4	1
0	0	69	61.4	1.02	8.12	2.34	3.43	0.2	63.92	1.71	124	139	4.5	0.38	1.94	3.31	5.73	0.5	12	286	2.19	0.89	1.55	3.79	4.53	1.1	0.25	3.02	18	29.4	0.96	0.97	11.3	2	2	2	2	5	3
0	1	81	69.0084	1.0632	8.7358	2.7722	2.35523	0.11	149.59	5.87	181	156	5.06	0.13	1.21	7.1	8.46	0.8	13.09	331	2.84	1.5	1.01	4.8	7.69	0.9	0.29	2.73	19.2	26.3	0.91	0.91	10.7	2	2	2	1	7	1
1	0	72	47.8	0.89	7.38	2.45	1.36	0.54	85.06	6.32	131	138	4.6	0.83	1.54	9.74	12.47	4.7	16	316	2.85	1.18	2.78	5.29	9.98	1.69	0.8	4.2	17.6	26.7	0.85	0.85	10	2	1	1	1	4	1
0	0	65	73.2	1.16	9.38	2.84	5.42	0.22	107.19	1.82	179	123	3.78	0.37	1.67	3.04	5.2	2	14	304	1.68	1.37	1.57	3.49	6.06	1.07	0.55	2.63	17.2	27.2	0.94	0.94	11	2	2	1	1	4	3
0	0	89	23.9	0.75	3.96	2	10	0.4	153.74	3.3	226	149	4.6	0.59	1.47	4.85	7.07	8.78	22.04	249	3.31	1.3	1.3	5.2	7.17	1.6	0.35	3.08	238	44.3	1.27	1.26	14.7	1	1	2	2	9	4
1	0	87	88.7	1.19	9.88	3.06	3.59	1.99	141.03	2.52	275	163	5.09	0.98	1.95	4.91	7.36	1.4	8	138	5.06	1.62	1.02	7.14	4.68	1.07	0.44	3.61	17	26.6	1.04	0.92	10.7	2	1	1	2	4	1
0	0	57	71.9	0.81	9.97	2.1	2.17	0.31	150.78	1.88	291	153	4.85	0.6	1.93	3.63	6.26	2.6	17.59	329.67	2.01	1.3	0.86	3.7	5.158	1.7998	0.4442	2.9222	17.239	27.307	0.9507	0.9502	11.075	2	2	2	2	5	3
0	0	68	53.1	0.96	9.05	3.02	3.16	6.59	96.13	2.37	323	124	63.4	0.51	3.36	7.96	5.36	3	18	297	3.61	1.09	1.46	5.36	5.57	0.54	0.37	5.35	18.1	27.434	0.89	1	10.6	2	1	2	2	1	1
0	1	75	68.0844	1.0344	8.2942	2.7701	2.95871	2.56	150	10.96	150	125	4.18	0.39	1	10.96	4.85	5.4	11	245	2.4125	1.3609	1.1693	5.5615	6.2979	0.8	0.3793	3.49	16.3	28.4	0.93	0.99	10.4	2	1	1	1	3	1
1	0	78	69.7	0.96	17.22	4.42	3.355	2.26	107.78	1.81	180	164	5.36	0.74	1.67	3.03	8.52	1	17.4	91	1.34	0.8	1.71	2.92	11.93	2.7	0.89	3.05	18.329	26.2	0.92	0.91	11.9	2	2	1	2	10	3
0	0	59	81.3	1.02	16.56	4.7	2.397	0.16	134.86	2.71	294	155	5.4	0.35	2.18	5.91	8.5	2.7	13	288	3.62	2.07	0.97	6.13	8.88	1.1	0.2	2.51	18.7	23.5	0.86	0.86	10.1	2	2	1	1	2	3
0	1	68	82.1	1.02	9.97	2.79	2.51	0.22	94.7	2.69	125	155	5.05	0.29	1.32	3.55	5.33	2.2	17.96	315.49	2.35	1.2	2.1	4.5	8.3529	1.07	0.24	3.9	16.2	24.2	0.97	0.97	11.4	1	2	1	1	0	1
0	1	71	81.5	0.87	9.71	2.75	2.26	0.15	96.91	1.57	157	153	4.77	0.25	1.62	2.54	4.57	1.419	11	244	2.68	1.8	0.92	4.9	5.32	2.41	0.52	2.31	18.7	31.2	0.99	0.99	11.6	1	2	2	2	1	4
0	1	75	108.25	0.92	21.34	5.73	2.708	0.2832	122.645	2.5882	202.25	159.1	5.236	0.4999	1.6935	4.5004	6.8749	1.853	15	211	2.82	1.03	0.91	4.27	5.41	1.8242	0.4252	2.9124	17.586	27.847	0.9625	0.9486	11.11	2	2	2	2	2	3
0	1	76	88	0.96	8.47	2.7	3.33	3.8	58.85	3.32	123	124	4.23	0.55	2.09	6.93	5.25	0.4	10	249	2.48	1	1.05	3.96	5.33	7.67	0.18	2.48	15.9	31.4	0.9501	0.99	11.2	2	1	1	2	2	1
0	1	49	67.4071	1.0737	8.2657	2.809	3.55062	4.74	86.43	1.63	172	130	4.14	0.42	1.99	3.24	8.63	0.5	10	253	3.03	1.54	0.86	4.96	5.83	0.7	0.57	2.77	17.3	27.2	0.92	0.85	9.7	2	1	2	2	7	1
0	1	53	110.46	0.68	24.77	4.78	0.001	0.3	95.68	1.98	177	171	5.75	0.55	1.85	3.66	6.29	0.5	21	281	2.13	0.79	2.03	3.81	10.72	0.53	0.2	1.66	18	29.6	1.01	1.01	11.8	2	2	1	1	2	1
1	1	57	96.23	0.6	18.48	3.5	3.226	2.36	69.26	4.58	178	147	5.17	1.09	2.57	11.77	5.79	1.6	12	286	2.19	0.89	1.55	3.79	4.53	5.91	0.25	5.18	17.7	26.5	0.93	0.93	11.5	2	1	2	2	13	1
0	0	61	78.9	1.23	13.86	4.99	2.762	0.21	97.5	2.18	195	151	4.81	0.42	2	4.36	6.88	0.7	10.27	234	2.35	1.2	1.74	4.34	6.37	0.7	0.42	2.2	17.7	26.8	0.82	0.82	9.6	1	2	1	1	2	3
0	1	55	69.4	1.1	8.68	2.94	1.72	0.24	116.74	2.52	265	163	5.14	0.54	2.27	5.72	8.71	1.6	25.11	485	1.82	1.1	2.38	4	7.56	0.53	0.2	2.35	133.3	36.5	1.12	1.12	13.1	1	1	2	1	2	2
1	0	69	65.9	0.79	8.6	2.19	1.49	0.56	225.51	6	221	132	4.35	0.55	0.98	5.88	7.54	4.9	12.61	268.45	3.04	1.55	0.9	5	19.2	4.81	1.7	3.02	17.2	23.2	0.93	0.93	10.9	2	2	1	2	7	3
0	0	60	64.5	0.95	7.89	2.53	2.06	0.23	126.55	2.8	224	136	4.87	0.4	1.77	4.96	7.22	2.5	16.11	323.96	2.4588	1.3024	1.6405	4.3403	7.1601	1.1	0.3	3.23	17.5	35.6	0.87	0.87	10.2	2	2	1	1	9	1
1	1	71	39.6	0.74	7.12	2.55	4.62	0.29	182.35	2.66	434	120	4.3	0.7	2.38	6.32	10.03	1.5	14.84	198	2.12	1.3	1.49	4.1	18.42	1.87	0.43	2.03	17	26.4	0.89	0.9	10.5	2	2	1	2	1	1
0	1	54	8.52	7.6	15.61	3.63	0.99	0.54	190.53	8.31	181	157	4.94	0.51	0.95	7.89	9.4	1.1	14.63	189	2.14	0.87	1.25	3.58	5.72	1.3	0.32	1.73	21.7	27.3	0.86	0.86	10.1	2	2	2	1	10	1
0	0	85	5.29	0.85	15.3885	4.08	4.18	0.32	282.72	9.94	229	121	4.25	0.26	0.81	8.05	9.39	8.4	14.35	268.23	3.24	2.3	1.46	6.21	7.0037	2.14	0.79	3.08	18.8	24.7	1.03	1.03	12	2	2	2	2	7	3
0	0	78	71.25	0.84	19.73	5.66	5.41	0.19	89.47	1.65	255	152	5.25	0.54	2.85	4.69	8.32	1.4	17	169	3.51	1.22	1.56	5.44	3.83	1.28	0.34	3.19	17.2	23.3	0.87	0.87	10.2	2	2	2	2	9	1
1	0	56	66.7	1.07	8.53	2.8	3.48	0.24	102.75	6.35	112	116	3.69	0.26	1.09	6.92	8.29	3.14	7	237	2.45	1.28	3.08	5.13	13.19	2.07	1.92	1.91	17.9	22.8	0.86	0.86	10.1	2	2	1	1	4	3
0	0	81	55.5	0.89	8.36	3.19	3.01	0.25	137.29	2.19	243	166	5.17	0.44	1.77	3.87	6.68	1.843	15	337	2.66	1.11	1.88	4.62	3.82	1.07	0.24	2.58	17.9	32.3	1.04	1.04	12.2	1	2	2	1	3	3
1	0	65	68	0.89	13.29	4.19	1.67	0.19	261.17	3.24	269	117	4.21	0.2	1.03	3.34	4.67	8.8	14.25	267.55	2.5535	1.3702	1.2473	4.8434	6.872	4.9	1.61	2.77	16.8	24.9	0.87	0.87	10.2	1	2	2	1	12	1
0	1	57	68.8337	1.0387	8.7705	2.7392	4.2081	0.21	158.56	1.76	176	137	4.91	0.23	1.11	1.95	3.46	0.5	8	204	1.73	0.83	1.43	3.39	6.62	0.53	0.23	2.23	17.3	29.1	0.89	0.9	10.5	1	2	1	1	2	1
0	1	78	70.9304	1.0346	8.7059	2.7199	3.22708	11.33	118.63	7.26	121	133	4.37	0.09	1.02	7.41	7.11	2.4	29	285	2.07	1.25	6.29	4.8	8.89	2.94	0.2	4.53	15.8	23.8	0.91	0.99	11.3	2	2	1	2	19	1
0	1	57	60.9	1.12	14.9	4.91	1.83	6.29	39.19	0.82	212	154	4.99	0.86	5.41	4.44	6.41	3	14	305	3.07	1.43	1.21	5.05	4.88	4.2	0.19	4.05	16.7	26	0.94	1.08	10.9	2	1	1	1	2	3
0	0	85	66.5429	1.0322	8.3563	2.677	3.04923	0.34	189.06	2.59	242	115	3.72	0.44	1.28	3.31	5.13	3.048	14	239	2.58	1.24	0.98	4.27	4.2	3.81	1.02	3.67	17.5	25.8	0.97	0.97	11.4	2	2	2	1	3	5
0	1	62	66.6752	1.0551	8.2712	2.6366	3.1497	0.15	78.35	1.38	181	135	4.39	0.35	2.31	3.18	6.06	2.118	12	228	1.87	0.78	1.65	3.4	6.13	0.8	0.31	3.71	16.9	26.6	0.92	0.92	10.8	2	2	1	1	3	3
0	0	78	66.2252	1.0916	8.0424	2.6779	3.47239	0.2	74.02	2.42	188	116	3.64	0.52	2.54	6.14	9.48	1.77	16	189	3.33	0.81	4.08	5.99	8.44	2.67	0.68	2.84	17.5	26.8	0.96	0.97	11.3	1	2	1	1	1	5
0	0	53	64.7	1.02	7.97	2.53	5.87	0.15	160	1.15	304	121	4.6	0.28	1.9	2.18	4.4	0.4	7	187	2.79	1.75	1.14	5.06	5.96	1.87	0.47	3.15	18	26.4	0.94	0.94	11	2	2	2	2	8	5
0	0	83	59.9	1.25	7.58	2.99	4.89	0.21	112.66	1.39	267	118	4.05	0.5	2.37	3.29	6.61	2.9	9	139	2.83	1.42	1.37	5.44	3.98	2.94	0.95	5.39	16	28.3	0.98	0.98	11.5	2	2	2	2	5	5
0	0	74	61.1	0.8	8.9	2.13	3.07	0.35	158.52	3.12	279	125	4.31	0.61	1.76	5.49	8.01	0.5	17.61	390	4.34	1.5	3.88	7.6	12.85	0.8	0.26	2.78	17.1	25.4	0.92	0.92	10.8	2	2	1	1	4	1
1	1	61	79.5	0.92	16.41	4.42	13.216	0.24	97.96	2.24	192	146	5.49	0.48	1.96	4.39	6.97	0.5	7	290	2.95	1.12	1.35	5.14	4.24	14.11	9.25	1.63	17	22.8	0.88	0.88	10.3	2	2	2	1	15	1
0	1	58	7.26	0.82	15.2388	4.53	2.27	0.16	90.21	0.98	175	138	3.86	0.32	1.94	1.91	4.3	1.27	19	283	2.79	1.09	1.58	4.6	5.69	1.07	0.26	1.35	18.2	25.9	0.96	0.96	11.2	2	2	2	2	14	5
1	1	90	79.1862	1.0078	9.2194	2.7679	3.71152	0.43	145.76	2.29	172	117	4.01	0.51	1.18	2.7	4.65	1.2	27	372	1.26	0.63	1.62	2.63	6.5	4.52	1.25	2.34	18.7	23.9	0.95	0.95	11.1	1	2	1	1	8	5
0	1	56	56.6	1	8.7	2.63	3.72	0.37	300.83	2.27	364	155	5.05	0.45	1.21	2.75	4.59	0.5	15	300	3.5	1.88	1.37	6.11	5.57	0.6	0.19	2.68	17	32.4	0.81	0.81	9.5	2	2	2	1	4	3
0	0	75	66.0983	1.0631	8.1188	2.8039	3.43973	0.24	91.75	1.64	178	125	4.26	0.46	1.94	3.19	5.69	0.9	10.59	203	3.56	1.32	0.97	6	5.34	0.8	0.28	2.23	19.2	25.2	1.05	1.05	12.3	2	2	2	1	8	5
0	1	72	70.8664	1.0861	8.6651	2.744	3.53426	0.2	127.44	2.02	209	131	4.47	0.32	1.64	3.31	5.37	1.2	11.01	255	3.73	1.3	1.18	5.57	5.81	1.3	0.4	2.96	17.4	22.6	0.79	0.79	9.3	1	2	2	2	10	1
1	1	75	50.3	1.03	6.96	2.58	7.48	0.3	120.44	2.24	218	146	4.62	0.54	1.81	4.06	6.8	1.2	39	323	2.74	1.23	1.21	4.52	4.52	4.28	1.39	2.84	17.9	31.7	1.03	1.03	12	2	2	2	1	2	3
1	0	82	76.3	1.08	9.58	2.83	3.02	0.43	127.78	6.37	184	81	2.68	0.62	1.44	9.17	11.33	180.7	13	319	2.4	0.75	1.14	3.67	4.81	4.7	1.72	8.23	16.5	27.5	1	1	11.7	1	1	2	1	5	2
1	0	70	65.3309	1.0777	7.997	2.7291	3.17589	6.52	122.75	1.99	232	129	4.54	0.29	1.89	3.76	6.43	144.4	10	264	3.3	1.06	1.2	4.9	6.06	1.7	0.44	3.12	16.7	29.8	1.01	0.79	10.8	2	1	2	2	5	5
0	1	86	71	1.05	6.84	2.53	0.948	2.13	188.24	3.72	160	130	4.19	0.4	0.85	3.16	6.38	4.598	15.69	294	2.4101	1.3561	1.4968	4.795	9.29	4.28	0.29	3.37	16.6	26.7	0.93	1.21	10.6	2	2	1	2	16	1
0	1	58	69.1685	1.0342	8.6257	2.757	2.74304	1.84	337.04	11.05	273	125	3.82	0.44	0.81	8.95	6.27	8.057	12.3	243.06	2.5382	1.3926	1.0211	5.4369	7.7664	3.39	0.7672	4.08	18	27.9	0.87	0.92	11.9	2	1	1	2	4	3
0	1	68	46.7	0.88	7	2.39	0.65	2.4	65.1	2.56	97	149	4.81	0.62	1.49	3.81	3.66	6.334	15.49	203	3.56	1.32	0.97	6	5.34	1.34	0.28	3.49	17.6	28.2	1.16	1.1	14.6	2	2	1	1	11	5
0	0	55	67.735	1.0164	8.4399	2.7916	2.71474	0.45	139.18	4.11	135	120	4.13	0.44	0.97	3.99	5.45	3.4	11.03	256.16	2.4445	1.3213	1.2888	4.3611	6.8328	1.7	0.25	2.61	16.9	25.1	0.98	0.98	11.5	2	1	1	1	5	4
0	0	69	76.33	1.05	14.47	5.65	2.941	0.2	63.92	1.71	124	139	4.5	0.38	1.94	3.31	5.73	0.5	12	286	2.19	0.89	1.55	3.79	4.53	1.1	0.25	3.02	18	29.4	0.96	0.97	11.3	2	2	2	2	4	3
0	0	85	104.7	0.58	23.1	3.84	0.14	0.09	141.06	3.52	213	148	4.89	0.13	1.51	5.32	6.96	3.075	13	475	2.02	1.3	1.23	3.87	6.11	3.09	0.82	3.59	17.7	23.7	0.9	0.91	10.6	1	1	2	2	6	2
0	0	53	88	0.96	8.47	2.7	3.33	0.22	131.13	2.46	198	138	4.98	0.33	1.51	3.72	5.68	1.314	12	390	2.31	0.87	2.33	4.24	5.98	0.8	0.23	3.08	18.2	29.2	0.92	0.92	10.8	2	2	2	1	4	3
0	0	81	56.9	0.61	9.39	1.99	1.7	0.32	208.41	4.4	223	142	4.48	0.34	1.07	4.71	6.37	9.8	32.17	474	0.88	1.4	0.71	2.6	5.65	7.02	1.86	2.13	15.7	28.1	1.12	1.12	13.1	1	1	2	1	5	4
0	1	50	61.4	1.21	7.61	3.15	3.22	0.15	120.22	0.95	446	141	4.74	0.56	3.71	3.53	8.07	1.5	7	328	3.13	1.35	1.21	5.27	5.3	1.6	0.49	2.58	17	32.7	1.08	1.08	12.6	2	2	2	1	4	5
0	1	78	66.7	1.07	8.53	2.8	3.48	0.21	89.57	2.25	146	110	3.62	0.35	1.63	3.66	5.74	1.724	13	295	1.59	1.03	1.17	3.15	4.7	2.26	0.4	2.96	16.9	26.9	1	1	11.7	1	2	2	1	7	5
0	0	76	53.9	1.12	7.55	3.16	1.94	3.44	166.67	2.85	235	152	5.28	0.41	1.41	4.02	7.11	0.2	15.59	285	3.73	1.1	0.82	5.2	11.31	0.8	0.23	3.3	17.3	29.2	1.1	0.88	11.2	2	2	1	1	15	5
0	1	60	53.1	0.96	7.21	2.6	3.76	0.17	59.7	1.48	157	137	4.29	0.46	2.63	3.89	7.41	0.7	13	488	2.73	0.86	1.55	4.44	4.24	0.47	0.2	2.44	16.7	29.5	0.96	0.97	11.3	2	2	2	2	4	5
0	1	67	62.5	0.89	8.76	2.75	1.75	0.83	216.09	6.74	188	142	4.5	0.72	0.87	5.86	7.49	10.3	18.41	180	1.13	1.4	0.81	2.9	7.44	1.07	0.91	3.15	15	28.4	1.06	1.06	12.4	2	2	1	1	14	4
0	0	77	9.06	4.98	17.32	4.6	4.28	0.23	78.8	2.3	171	143	4.58	0.5	2.17	4.99	7.87	0.5	13.19	322	1.61	1.1	2.37	3.79	10.38	0.9	0.32	1.75	18	25	0.88	0.88	10.3	1	1	1	1	8	2
0	0	71	67.5	0.75	9.37	2.45	1.01	0.24	136.32	2.01	274	159	5.45	0.48	2.01	4.04	6.66	1.454	12.41	288.77	3.73	2.1	1.25	6.4	6.0054	0.8	0.2	2.78	17.3	27.4	0.9	0.91	10.6	2	2	2	2	2	5
0	1	73	71.3	1.09	8.32	3.26	1.5	1.25	121.18	9.13	103	172	5.26	0.68	0.85	7.76	4.75	4	10	268.66	1.77	1.24	0.55	3.26	7.128	0.53	2.15	4.42	15.9	25.9	0.99	1.09	11.9	1	1	1	1	4	3
0	0	75	75	0.95	9.98	2.82	3.05	0.23	109.25	2.6	189	144	4.52	0.39	1.73	4.49	6.74	2.4	12.19	286.88	2.4172	1.363	1.378	4.8205	7.5766	3.74	1.18	2.53	17.4	26.4	0.85	0.85	10	2	2	1	1	2	1
0	1	60	4.25	1.34	15.5386	4.39	1.16	0.18	110.81	2.05	246	157	4.77	0.41	2.22	4.55	7.77	6.2	13	189	2.54	0.48	1.38	3.65	5.06	1.07	0.19	3.29	15.8	23.2	1.04	1.03	12.1	2	2	1	1	2	5
0	1	76	65.4162	1.049	7.5808	2.7001	3.68253	0.38	144.06	6.29	206	130	4.43	0.55	1.43	9	11.04	4	11.5	188	2.4	1.4	1.33	9.67	4.6	1.87	0.85	3.08	16.2	27.2	0.98	0.98	11.5	2	2	2	1	4	4
1	1	70	71.2152	1.0434	8.7388	2.6944	3.13091	0.44	99.47	4.15	186	142	4.49	0.83	1.87	7.76	10.56	16.3	27	229	0.98	0.77	1.4	2.39	7.15	0.75	0.23	3.67	16.7	26	0.98	0.98	11.5	2	2	1	1	12	1
0	0	54	63.8	0.92	9.13	2.45	3.83	0.21	91.67	1.73	165	141	4.34	0.38	1.8	3.11	5.37	0.8	10	234	2.88	1.25	0.83	5.2	6.15	0.53	0.19	2.16	17.2	25.3	0.97	0.97	11.4	2	2	2	1	3	5
0	0	51	71.9	1.23	8.55	3.28	1.12	0.3	133.09	2.67	185	128	5.36	0.42	1.39	3.71	5.38	0.4	9	275.77	2.11	1.9	3.05	5.4	8.8817	0	0.18	1.75	17.5	25.4	0.89	0.89	10.4	2	2	2	1	3	5
0	0	84	51.5	0.85	7.13	2.51	6.4	0.25	130.97	2.23	203	133	4.36	0.38	1.55	3.45	5.47	3.4	15	125	2.16	0.97	1.79	3.74	9.31	2.67	1.01	2.53	17.4	24.8	0.9	0.91	10.6	1	2	1	1	2	5
1	1	71	67.6	1.07	8.02	3.06	2.25	0.29	182.35	2.66	434	120	4.3	0.7	2.38	6.32	10.03	1.5	14.41	198	2.12	1.3	1.49	4.1	18.42	1.87	0.43	2.03	17	26.4	0.89	0.9	10.5	2	2	1	2	1	1
0	1	75	53.6	0.93	7.21	2.85	3.17	4.13	74.06	2.24	217	110	3.36	0.71	2.93	6.55	3.38	5.1	13	406	2.04	0.94	1.31	3.82	3.99	1.24	0.8786	2.15	17.9	26.4	0.96	0.96	10.1	2	1	2	2	8	5
1	0	63	6.49	3.31	14.7	3.7	2.56	4.63	179.14	2.48	249	143	4.36	0.3	1.39	3.45	6.91	0.4	27	229	0.98	0.77	1.4	2.39	7.15	0.9	0.23	2.8	17.1	31.2	1.11	0.91	13.2	2	1	1	2	1	5
0	0	79	71	1.06	10.3	3.28	2.68	0.19	56.4	1.56	97	136	4.56	0.33	1.72	2.69	4.96	14.5	12	327	2.47	1.32	0.87	4.3	4.84	3.41	1.25	3.02	15.7	27.2	0.98	0.98	11.5	1	2	2	2	5	5
1	1	58	67	0.89	8.91	2.35	0.999	2.94	154.64	5.36	150	141	4.5	0.33	0.97	5.2	6.4	7.842	19	562	2.13	1.06	1.03	3.66	4.14	0.53	0.76	4.34	19.1	29.2	0.93	1.12	9.2	2	1	1	2	5	3
1	1	56	79.4	1.38	9.58	3.37	1.89	0.23	79.32	1.31	280	152	4.52	0.82	3.53	4.61	9.4	9.9	51	291	3.75	1.35	1.41	5.74	4.84	0.27	0.19	2.63	17.6	30.6	0.94	0.94	11	2	2	2	2	1	1
0	1	72	61.6	0.83	14.5	4.14	5.395	0.43	103.87	4.29	161	133	4.42	0.66	1.55	6.65	9.03	2.2	15	467	2.47	1	1.92	4.34	3.23	1.1	0.41	2.51	17.5	26.7	1	1	11.7	2	2	1	1	1	3
1	1	71	64.5	0.95	7.89	2.53	2.06	3.3	177.27	4.09	117	121	4.15	0.2	0.66	2.7	5.3	2.1	22	275	1.52	0.84	1.95	3.25	5	1.6	0.44	3.26	18.4	28.7	0.99	0.82	11.4	1	1	1	1	9	3
0	0	88	45.23	0.77	11.97	4.03	1.648	0.3	166.92	2.11	222	103	3.73	0.4	1.33	2.8	4.68	1.6	17	338	2.08	1.15	0.53	3.47	4.02	3.09	0.92	2.3	17.1	24.6	0.95	0.95	11.1	2	2	2	1	7	3
1	1	68	86.8	1.12	11.19	3.26	2.23	0.2	78.98	1.82	124	145	4.65	0.31	1.57	2.85	5	1	26	280	2.24	1.09	1.49	4.01	5.17	1.34	0.21	2.48	16.6	28.2	1.02	1.02	11.9	1	2	1	1	4	1
0	0	52	67	0.89	8.91	2.35	0.999	0.17	51.22	2.4	105	157	5.22	0.34	2.05	4.93	7.34	2.2	11	301	4.06	1.85	0.91	6.33	8.98	0.74	0.19	3.02	18.3	25.5	0.81	0.81	9.5	2	2	1	1	3	5
0	1	50	71.9	0.81	9.97	2.1	2.17	0.18	91.58	2.06	185	158	6.08	0.37	2.02	4.17	6.67	2.748	16	451	2.51	0.73	2.08	4.19	5.1	0	0.19	2.44	17.7	28.6	0.9	0.91	10.6	2	2	2	1	16	3
0	0	74	66.7234	1.0401	8.3773	2.7405	3.19328	0.83	278.33	9.7	167	119	3.65	0.5	0.6	5.82	7.02	3.2	15.16	267	4.7	1.5	1.76	7	6.39	7.02	1.21	3.37	16.5	25.5	0.99	0.99	11.6	2	2	2	1	2	5
0	1	42	58.1	1.11	7.9328	2.7952	6.4	0.22	113.51	2.3	210	152	5.28	0.41	1.85	4.26	7.11	0.2	17	206	2.78	0.91	1.98	4.58	6.16	1.24	0.19	1.97	17.1	30.4	0.96	0.96	11.2	2	2	1	2	10	5
0	1	54	56	1.02	8.63	2.94	2.51	0.15	77.05	1.38	225	152	5.04	0.45	2.92	4.03	7.62	0.9	12	211	3.79	1.34	1.74	5.95	6.76	1.53	0.6	2.4	16.8	28.9	0.9	0.91	10.6	2	2	1	1	5	3
0	0	74	72.6	0.89	8.05	2.55	3.08	0.21	133.68	1.72	254	133	4.05	0.4	1.9	3.27	5.67	2.9	21	519	4.09	1.3	1.95	6.69	4.5	1.87	0.79	2.84	17.6	28.6	1.02	1.02	11.9	2	2	2	1	1	5
0	0	81	66.5	0.99	7.69	2.57	7.71	0.22	288.8	3.22	361	128	4.08	0.27	1.25	4.03	5.61	1.3	16.18	294	2.61	0.8	2.26	4.44	8.7	1.9	0.76	3.23	18.6	23.6	0.89	0.89	10.4	2	1	1	1	3	5
0	0	74	66.7244	1.0428	8.3874	2.7334	3.1432	0.83	278.33	9.7	167	119	3.65	0.5	0.6	5.82	7.02	3.2	15.08	267	4.7	1.5	1.76	7	6.39	7.02	1.21	3.37	16.5	25.5	0.99	0.99	11.6	2	2	2	1	3	5
0	1	55	5.67	8.06	14.19	5.87	2.14	0.17	148.65	2.37	275	127	4.64	0.32	1.85	4.39	6.69	0.5	10	265	2.07	0.87	2.29	3.98	5.15	1.32	0.2	2.3	20.4	26.1	0.95	0.95	11.1	2	2	2	1	4	3
0	1	58	5.28	1	12.91	5.35	2.92	0.23	111.98	2.73	243	134	4.5	0.5	2.17	5.93	8.72	0.5	11.57	174	4.04	1.37	1.63	6.15	5.66	1.51	0.29	2.15	19.5	21.1	0.88	0.88	10.3	2	2	2	1	9	5
0	0	61	49.4	0.89	7.11	2.33	2.22	0.52	170.45	5.33	150	121	3.84	0.46	0.88	4.69	6.21	4.9	20	518	2.32	0.99	2.38	4.43	8.09	0.5	0.19	3.02	17.6	24.3	0.95	0.95	11.1	2	2	1	1	2	5
0	0	78	61.5391	1.0292	7.8423	2.8156	4.36105	0.14	125.84	1.62	263	104	3.46	0.3	2.09	3.38	5.88	1.9	15.9	122	2.11	1.15	0.86	3.65	4.89	1.65	0.51	2.63	21	32	1.03	1.03	12	1	2	2	1	7	1
0	1	58	12.32	2.14	20.58	7.61	0.01	0.34	137.25	2.91	140	149	4.74	0.35	1.02	2.97	4.58	0.4	23	268	2.22	1.05	1.54	3.97	5.41	0.8	0.18	1.66	18.8	23.8	0.99	0.99	11.6	1	2	2	1	0	5
0	1	53	12.32	2.14	20.58	7.61	0.01	0.34	137.25	2.91	140	149	4.74	0.35	1.75	3.36	5.62	0.5	16	318	3.28	1.28	1.7	5.22	4.82	0.53	0.21	1.97	18	25.5	1	1	11.7	2	2	2	1	6	1
0	1	83	37.6	0.78	7.95	2.2	2.57	0.34	166.21	2.28	241	121	4.01	0.49	1.45	3.3	5.67	9.428	19	562	2.13	1.06	1.03	3.66	4.14	2.94	0.76	4.01	16.5	27.4	1	1	11.7	2	2	2	1	5	1
0	1	54	83.9	1.21	9.73	3.29	1.6	0.14	141.44	1.96	314	157	4.62	0.31	2.22	4.36	7.03	1.5	6	307	1.89	1.32	0.78	3.9	4.94	0.8	0.19	2.13	16.4	26.2	0.9	0.91	10.6	1	2	2	2	17	4
0	0	80	71.9	1.23	8.55	3.28	1.12	0.38	168.84	3.91	233	131	4.39	0.53	1.38	5.4	7.51	5.4	15.34	325	2.8	1.16	1.07	4.45	4.05	1.13	0.63	2.67	18.1	25.5	1.01	1.01	11.8	2	2	2	1	5	5
1	0	86	72.7	1.24	8.11	2.99	1.55	0.36	543.18	12.7	239	122	3.77	0.16	0.44	5.59	6.2	5.7	14.44	193	1.96	1.8	0.73	4.09	5.97	10.3	2.71	3.8	18	27.8	0.91	0.91	10.6	2	2	2	2	17	1
0	0	74	65.085	1.0665	8.3823	2.7558	3.23258	0.18	78.95	1.3	180	130	4.35	0.42	2.28	2.97	5.8	1.8	8	225	2.06	1.23	1.64	4.03	4.41	0.56	0.19	1.81	19.3	25.8	0.93	0.93	10.9	1	2	2	1	12	5
0	0	76	55.9	1.03	8.38	2.75	2.95	0.57	146.46	3.81	186	143	4.36	0.73	1.27	4.84	6.91	0.4	12.51	303	1.92	2	1.05	4.4	6.6	0.53	0.19	3.15	18	28.3	0.95	0.95	11.1	2	2	2	1	5	5
0	1	62	75.601	1.038	9.2532	2.8198	4.27169	0.22	133.97	2.5	209	145	4.33	0.34	1.56	3.9	5.96	2.1	11	326	2.01	1.28	0.86	3.68	6.16	0.94	0.19	2.59	17.7	25.9	0.91	0.91	10.7	2	2	2	1	3	1
0	1	75	61.2	1.04	16.73	4.16	1.601	0.21	53.5	1.76	130	150	4.37	0.52	2.43	4.27	7.54	2.339	11	444	3.34	1.45	1.77	5.59	6.62	2.41	2.12	1.97	16	28.9	0.98	0.98	11.5	2	2	2	1	4	1
0	0	69	64.0641	0.9361	8.43	2.45	1.29	0.14	113.07	1.61	225	122	4.26	0.28	1.99	3.21	5.59	0.5	13.71	265	4.2	1.08	1.03	5.74	8.16	1.34	0.19	2.73	15.2	24.8	0.98	0.98	11.5	2	2	1	2	1	5
0	1	52	66	1.06	7.92	2.75	2.39	9.82	55.69	1.02	279	145	5.01	0.51	5.01	5.09	6.71	1.4	15.94	267	4.7	1.5	1.76	7	6.39	1.53	1.21	2.48	18.3	27.8	1.11	0.91	10.1	2	1	1	2	8	1
1	1	57	10.33	0.9	19.74	4.74	0.89	0.2	89.1	1.64	188	140	4.97	0.43	2.11	3.47	6.11	0.5	13	406	2.04	0.94	1.31	3.82	3.99	1.2837	0.3652	2.8745	17.693	27.853	0.9516	0.9519	11.101	2	2	2	1	5	5
0	1	74	59.8641	1.031	8.1492	2.7369	3.71879	0.32	231.25	3.13	259	73	2.83	0.36	1.12	3.51	5.1	3.5	16.44	383	2.07	1.24	0.49	3.53	4.64	2.07	0.45	3.83	17.1	26.5	0.94	0.94	11	2	2	2	1	5	5
1	1	62	65.9562	1.0798	8.3174	2.721	3.12935	0.22	113.33	2.72	238	149	4.93	0.47	2.1	5.72	8.56	0.5	8	218	3.29	1.06	2.1	5.3	10.39	1.51	0.19	2.34	17.1	26.6	0.91	0.91	10.7	2	2	1	1	11	5
0	0	73	63.18	0.67	17.95	4.08	3.374	0.32	164.75	2.47	201	125	4.18	0.39	1.22	3.01	4.85	5.4	13	154	2.22	1.12	1.24	3.9	5.1	5.58	1.61	3.67	16.6	26.2	0.92	0.92	10.8	1	2	2	1	8	1
0	0	56	68.5469	1.0716	8.6691	2.6712	3.57735	5.83	88.73	1.84	181	161	4.72	0.35	2.04	3.76	6.64	2.7	22.32	488	1.24	1.2	1.65	3.19	4.36	2.07	0.75	3.45	16.7	26.9	0.81	0.94	12.1	1	1	1	2	3	5
0	0	70	62.1	1.2	8.41	3.2	1.87	8.24	110.71	2.17	155	136	4.58	0.17	1.4	3.04	4.22	0.5	15	334	2.85	1.36	3.7	5.27	21.61	0.6	0.33	3.33	237	28.1	0.97	0.96	11.3	2	2	1	2	12	5
1	1	92	69.3835	1.0401	8.6254	2.8104	3.03192	0.49	156.46	4.08	230	152	5.06	0.72	1.47	6	8.3	3.7	12.23	221	2.9	2.3	0.56	5.45	5.39	2.5	0.64	2.96	16.9	28.5	0.85	0.85	9.9	2	2	2	2	10	1
0	0	69	65.0992	1.07	7.769	2.7463	5.45352	0.32	94.39	0.81	185	124	4.35	0.62	1.96	1.59	4.26	7.3	9	180	2.53	1.14	1.55	4.31	5.08	1.45	0.67	3.52	18.9	33.8	1.04	1.03	12.1	2	2	2	1	5	5
1	1	65	76.9	1.36	8.54	2.99	1.41	0.19	87.92	2.4	182	142	4.74	0.4	2.07	4.97	7.62	5.3	47	244	1.5	1.1	1.55	3.3	14.38	1.07	0.39	3.71	15.7	26.4	0.96	0.96	11.2	2	1	2	1	2	2
0	1	79	67.2	1.17	9.03	3.27	4.67	0.15	68.06	1.08	179	132	4.44	0.4	2.63	2.84	6.03	0.4	13	282	2.29	1.73	0.85	4.41	4.16	3.74	0.85	2.9	18.8	27.5	1	1	11.7	1	2	2	2	6	3
1	0	63	66.8419	1.0546	8.2744	2.7754	3.06889	0.26	217.95	5.09	255	126	4.02	0.31	1.17	5.95	7.46	1.4	22	191	3.64	1.8	2.23	6.29	7.62	1.02	0.28	2.55	19.4	25	0.96	0.96	11.2	2	2	1	1	9	3
0	0	83	62	1.03	7.88	3	3.86	0.15	81.9	1.11	181	125	4.08	0.34	2.21	2.45	5.07	2.6	10	235	1.91	0.96	1.03	3.57	5.06	1.6	0.48	2.35	17.5	31.7	1.15	1.15	13.4	1	2	2	1	2	4
0	1	67	65	1.02	6.54	2.35	1.79	0.41	201.04	4.69	193	126	4.49	0.39	0.96	4.5	5.99	4.9	9	383	1.66	0.8	0.9	2.87	4.47	1.13	0.26	3.67	18.8	27.6	0.92	0.92	10.8	1	2	2	1	2	3
0	0	58	72.083	1.0588	8.9788	2.8139	2.7103	0.51	208.66	4.25	265	160	4.3	0.65	1.27	5.4	7.37	3.5	18.55	501	1.44	1.1	1.68	3.3	6.17	5.3	1.18	2.9	16.8	25.2	0.95	0.95	11.1	2	2	2	1	2	5
0	1	87	9.74	0.47	8.0882	2.83	1.81	0.22	340	7.31	289	98	3.42	0.19	0.85	6.21	7.28	152.9	37.76	220	2.64	0.42	0.65	3.36	5.45	10.25	2.09	1.08	20	41.7	1.4	1.38	16.2	1	2	1	1	2	5
0	1	78	67.8202	1.074	8.5484	3.048	3.27368	0.28	50.37	1.79	68	116	3.69	0.38	1.35	2.42	4.26	5.527	14	260	1.82	0.93	1.06	3.23	4.97	0.53	0.35	3.08	17.7	28.1	1.05	1.05	12.3	2	2	2	2	1	1
0	1	69	71.1	0.7	18.83	5.23	1.89	2.15	125.16	4.35	199	100	3.55	0.74	1.59	6.92	3.89	1.3	13.41	248.99	2.44	1.4454	1.3129	4.9469	7.2379	1.65	0.24	3.91	19.3	26.4	0.9949	0.98	12.3	2	2	1	1	11	5
0	1	64	71.1	0.7	18.83	5.23	1.89	0.24	101.04	1.19	195	172	5.26	0.46	1.93	2.3	4.75	4	14.97	318	3.33	2.1	1.84	6.27	6.1	0.7	0.33	2.45	18.2	27.5	0.85	0.85	10	1	1	2	1	6	5
0	1	81	84.7	1.03	9.06	2.83	5.64	114	238.6	4.79	272	122	3.48	0.01	1.14	5.46	4.63	16.9	22	130	1.27	1.27	0.67	2.84	10.77	0	0.18	5.76	17.8	29.4	0.85	0.89	11.8	1	1	1	1	19	1
0	0	66	7.44	1.66	11.52	5.55	6.4	0.32	157.58	3.01	156	129	4.26	0.32	0.99	2.98	4.4	2.8	13.47	280	2.426	1.3483	1.5403	4.7531	5.57	0.53	0.18	2.78	16.5	25	0.97	0.97	11.4	2	2	2	2	5	5
0	1	56	104.7	0.58	23.1	3.84	0.14	3.42	111.06	2.59	251	73	2.83	0.66	2.26	5.85	5.1	3.5	23.3	485	4.46	1.2	1.54	6.36	5.94	1.1	0.77	3.58	18.4	27.4	0.92	0.94	10.1	1	1	1	2	3	3
0	1	54	8.72	1.31	16.2058	6.04	3.89	0.22	106.79	2.46	173	152	4.57	0.35	1.62	3.98	6.08	1.679	17.78	413	4.87	1.3	2.05	6.889	9.09	1.7243	0.3959	2.8379	17.657	27.007	0.9498	0.9499	11.093	2	2	1	1	5	4
0	0	41	141.3	0.8	25.63	4.68	0.958	1.79	100.67	6.77	151	160	4.3	0.84	1.5	10.16	7.37	3.5	9	259	2.56	1.08	2.09	4.51	5.1	13.22	0.28	2.16	17.9	43	1.01	1.11	10.3	2	2	2	2	14	3
0	0	48	67.3443	1.0726	8.5123	2.7333	3.26638	0.2892	124.303	2.5904	210.45	142.77	4.6058	0.5092	1.7012	4.5219	7.0122	5.339	14.67	270.29	2.4692	1.3811	1.4886	5.0953	7.6506	0.38	2.24	3.25	17.1	27.5	0.79	0.79	9.3	1	2	1	1	3	3
0	1	57	72	1.14	16.76	5.46	3.726	0.24	75.85	1.74	223	163	5.18	0.72	2.94	5.13	8.97	3.1	12.96	286.75	2.4344	1.3618	1.4259	4.9705	6.4543	2.2	0.56	3.23	17.8	27.2	0.83	0.84	9.8	2	2	2	2	18	5
0	0	60	79.1	1.19	19.05	5.62	1.8	0.3	155.15	3.58	211	138	4.6	0.41	1.36	4.87	6.69	0.5	9	228	4.63	1.73	1.24	6.92	7.11	1.13	0.24	3.52	18.1	24.5	0.79	0.79	9.3	2	2	2	2	10	3
0	1	80	55.5	1.06	8.46	2.58	2.9	0.29	105.61	3.58	207	147	4.32	0.56	1.96	7.02	10.2	2.91	20	374	2.11	0.9	1.81	3.83	5.65	1.07	0.44	3.37	147.2	34.3	1.12	1.12	13.1	1	1	2	1	3	5
1	1	86	81.5	1.12	8.98	2.4	2.7	4.03	87.58	2.24	141	141.63	4.5122	0.4	1.61	3.61	5.8959	1.559	39	323	2.74	1.23	1.21	4.52	4.52	0.53	1.39	3.05	17.6	23.8	0.92	0.97	10.1	2	1	2	2	8	5
0	0	60	50.3	1.03	6.96	2.58	7.48	0.3	155.15	3.58	211	138	4.6	0.41	1.36	4.87	6.69	0.5	9	228	4.63	1.73	1.24	6.92	7.11	1.13	0.24	3.52	18.1	24.5	0.79	0.79	9.3	2	2	2	2	10	3
1	0	68	63.18	0.67	17.95	4.08	3.374	3.8	98.21	2.86	220	137	4.57	0.59	2.24	6.41	9.83	4.4	13.27	227	2.39	1	0.9	3.8	6.21	9.2733	11.35	4.65	16.9	25.3	0.94	0.9594	10.6	1	1	2	2	9	5
0	1	65	50	1.08	7.75	2.79	6.89	0.2956	122.267	2.5344	208.29	163.7	7.9385	0.5133	1.7159	4.4524	6.8974	1.541	14.39	292.61	2.52	1.4259	1.2398	4.9796	5.882	1.34	0.27	2.13	28.5	30	1.04	1.03	12.1	2	2	2	2	5	5
0	1	68	68.1263	1.0768	8.5662	2.6814	3.51102	0.17	98.56	1.48	206	137	3.99	0.36	2.09	3.09	5.84	3.7	32.97	482	1.14	1.2	3	3.7	5.46	1.07	0.3	3.22	17.6	26.9	0.9	0.91	10.6	2	2	2	2	2	5
0	1	43	55	1.07	8.09	2.32	2.8	0.26	121.85	3.89	184	147	4.91	0.4	1.51	5.88	7.85	2.8	18	252	3.12	1.03	2.04	5.08	7.48	1.47	0.33	2.47	19.2	25.9	0.97	0.97	11.4	2	2	2	1	5	3
0	1	54	120	1.21	11.19	2.64	4.15	0.54	190.53	8.31	181	157	4.94	0.51	0.95	7.89	9.4	1.1	21.83	189	2.14	0.87	1.25	3.58	5.72	1.3	0.32	1.73	21.7	27.3	0.86	0.86	10.1	2	2	2	1	10	1
0	0	74	67.9017	1.0955	8.334	2.7486	3.39524	0.2955	109.557	1.706	211.79	139.93	4.4533	0.5323	1.9	3.27	5.67	2.9	21	519	4.09	1.3	1.95	6.69	4.5	1.87	0.79	2.84	17.6	28.6	1.02	1.02	11.9	2	2	2	1	2	5
0	1	64	81.4	1.4	8.91	3.59	3.8	0.32	139.66	2.46	243	151	5.16	0.56	1.74	4.28	6.64	6.6	18.8	247	2.64	1	3.87	5.4	14.41	0	0.19	2.53	17.6	29.5	0.96	0.96	11.2	2	2	1	1	9	1
1	1	79	71.3	0.93	9.34	2.86	2.96	0.41	159.05	9.4	167	164	5.49	0.43	1.05	9.87	11.41	5.5	21.78	400	2.3738	1.3259	1.6281	4.31	7.31	1.87	0.44	3.37	17.3	28.8	1.05	1.05	12.3	1	2	2	1	0	1
0	1	55	67.9347	1.1	8.68	2.94	1.72	0.2	67.74	1.36	210	153	4.84	0.62	3.1	4.22	8.24	2.1	24	403	2.16	0.93	1.06	3.57	5.63	1.07	0.22	2.31	97.4	37.2	1.19	1.19	13.9	1	1	2	1	4	1
1	1	55	66.9858	1.0466	8.4628	2.7683	2.80859	0.26	101.1	2.04	183	148	4.55	0.47	1.81	3.69	6.31	4.6	32	329	2.46	0.6	1.06	3.54	5.06	1.07	0.24	1.25	17.9	26.9	1.01	1.01	11.8	2	2	2	2	28	5
1	1	90	7.66	8.02	15.87	5.58	3.18	0.29	103.19	5.6	97	145	5.14	0.27	0.94	5.26	6.57	4.9	15.18	373	2.11	1.1	2.04	4.14	16.65	1.9	0.42	2.86	17	26.5	0.89	0.89	10.4	2	2	1	1	3	3
0	1	57	67.5	0.75	9.37	2.45	1.01	0.25	88.94	1.89	209	153	4.74	0.58	2.35	4.43	7.67	0.5	15.25	319.36	2.387	1.4033	1.6357	4.9706	10.2049	0.6	0.19	3.06	17.9	24.6	0.79	0.79	9.2	2	2	1	1	3	3
0	0	81	66.7722	1.0209	8.3221	2.7509	2.56615	0.34	151.26	4.76	180	124	4.06	0.4	1.19	5.67	7.31	0.5	15.04	262	1.17	1.09	0.89	2.9	5.26	2.19	0.69	3.07	17.8	27.2	1.03	1.03	12	2	2	2	2	7	3
0	1	81	62.8	1.3	7.41	3.11	7.89	0.22	146.53	1.8	296	127	4.36	0.45	2.02	3.63	6.43	0.9	12	224	3.04	1.39	1.02	5.19	5.12	2.67	0.61	2.73	16.7	27.9	0.96	0.96	11.2	2	2	2	2	8	3
0	0	80	65.9301	1.057	8.1954	2.7994	2.24924	0.38	168.84	3.91	233	131	4.39	0.53	1.38	5.4	7.51	5.4	15.89	325	2.8	1.16	1.07	4.45	4.05	1.13	0.63	2.67	18.1	25.5	1.01	1.01	11.8	2	2	2	1	10	5
1	1	59	71.74	1.0576	8.76	2.7273	3.30509	5.54	85.42	2.44	123	139	4.5	0.26	1.44	3.52	5.73	0.5	38	482	2.1	1.29	2.47	4.51	5.56	2.14	0.18	3.15	17.7	29.2	0.97	0.89	10.7	2	1	1	2	3	5
0	1	42	59.8	0.9	7.42	2.55	2.6	4.37	80.62	1.76	183	133	4.73	0.52	2.27	4	10.65	2.8	16.44	235	1.52	1.2	0.61	3	5.14	1.6	3.17	3.37	16.1	23.2	0.99	1.08	10.2	2	1	1	2	4	1
0	0	58	108.6	0.85	20.1	4.4	3.078	0.18	115.67	1.93	251	145	4.84	0.39	2.17	4.18	6.81	3.6	10.47	264	2.79	1.7	1.15	5.01	6.23	1.1	0.28	2.3	17.8	25	0.85	0.85	10	2	2	2	1	6	3
0	1	74	68.7	1.01	8.79	3.08	1.68	0.4	165.44	2.93	225	111	3.73	0.54	1.36	3.99	6.34	2.5	12.41	270.1	2.4239	1.3557	1.2669	4.8068	5.3109	2.14	1.15	2.68	17.2	29.1	1.01	1.01	11.8	2	2	2	2	3	4
1	1	67	58	0.89	7.75	2.33	1.72	0.44	285.19	5.3	308	136	4.52	0.48	1.08	5.72	7.61	13.8	15	334	2.85	1.36	3.7	5.27	21.61	1.6	0.33	4.48	17.7	25.9	0.88	0.88	10.3	2	2	1	1	8	5
0	1	59	66.6456	1.102	8.3473	2.7853	3.19288	6.36	54.9	1.11	157	141	4.74	0.45	2.86	3.18	8.07	1.5	17	206	2.78	0.91	1.98	4.58	6.16	0.53	0.19	1.77	18.6	29.3	0.88	0.9	10.1	2	1	2	2	11	5
0	1	59	76	1.27	9.31	3.44	0.66	3.76	100	2.12	233	118	4.49	0.62	2.33	4.95	5.28	0.5	14.62	320	2.44	1.13	3.71	4.35	5.47	14.11	0.22	3.3	17.9	30.4	0.89	0.88	10.5	2	1	1	1	4	2
0	0	86	71.3921	1.051	8.7316	2.8134	2.94482	0.23	101.48	2.7	137	147	5.17	0.31	1.35	3.64	5.79	1.6	12	295	2.71	1.72	1.13	4.95	5.17	1.69	0.38	2.86	17.1	27.8	0.9	0.91	10.6	2	1	2	1	4	5
0	0	78	46.4	0.82	7.11	2.39	3.57	0.2	74.02	2.42	188	116	3.64	0.52	2.54	6.14	9.48	1.89	16	189	3.33	0.81	4.08	5.99	8.44	2.67	0.68	2.84	17.5	26.8	0.96	0.97	11.3	1	2	1	1	1	5
0	1	79	59.7	1.14	7.69	2.69	8.36	0.26	122.96	2.53	166	128	4.26	0.35	1.35	3.42	5.14	1.8	14	265	3.09	1.51	0.94	5.03	5.53	1.34	0.32	3.02	15.4	26.6	0.98	0.98	11.5	2	2	2	1	4	1
0	0	69	8.02	4.98	15.2	5.11	1.9	0.2	98.27	1.86	227	139	4.41	0.47	2.31	4.3	7.21	0.6	18	271	2.18	0.88	0.72	3.39	4.3	1.13	0.19	2.55	18.8	28.9	1.02	1.02	11.9	1	2	2	1	2	3
0	0	70	7.26	0.96	14.3934	4.27	1.25	0.23	135.71	1.9	171	123	4.02	0.29	1.26	2.4	4.1	0.4	9	179	1.39	0.8	1.36	2.81	8.13	3.48	0.95	2.09	16.1	21.8	1.07	1.07	12.5	1	2	1	1	7	5
0	0	91	55.4	0.89	7.8	2.36	1.94	0.19	146.79	1.94	229	155	4.93	0.29	1.56	3.02	5.02	0.4	18.15	318.55	2.4337	1.3202	1.2736	4.3988	5.434	9.6	3.35	2.73	17.4	27.5	0.96	0.96	11.2	2	2	2	2	3	1
1	0	83	6.83	5.09	14.64	4.06	1.44	3.07	188.04	8.22	173	143	4.62	0.3	0.92	7.56	7.09	0.5	16.18	341	2.74	1.6	2.55	5.5	5.88	4.2	0.92	2.8	17.3	26.3	0.94	0.99	12.7	1	2	1	2	16	1
0	1	58	55.4	0.96	7.9	3.16	3.27	0.34	137.25	2.91	140	149	4.74	0.35	1.02	2.97	4.58	0.4	23	268	2.22	1.05	1.54	3.97	5.41	0.8	0.18	1.66	18.8	23.8	0.99	0.99	11.6	1	2	2	1	0	5
0	1	59	70.5224	1.0996	8.6793	2.7407	2.39726	0.22	171.77	1.74	359	147	4.88	0.45	2.09	3.64	6.38	2.934	9	303	3.04	1.31	1	4.8	4.67	0.53	0.19	5.06	16.4	27.3	0.92	0.92	10.8	2	2	2	2	5	1
1	1	54	6.24	5.33	14.2	5.82	0.99	3.51	138	4.6	276	125	3.96	0.57	2	9.19	4.04	1.1	10	216	3.08	1.65	0.93	5.15	5.33	1.51	0.81	3.02	15.4	22.8	0.91	0.95	11.9	1	1	1	1	3	5
0	1	70	70.863	1.0111	8.6832	2.798	3.03672	2.28	108.76	2.61	149	117	4.01	0.6	1.37	3.58	4.65	1.2	18	188	2.02	1.49	0.89	3.91	5.37	3.4	0.19	4.46	16.8	26	0.89	0.92	12.6	2	1	1	1	9	5
1	0	81	69.7	0.96	17.22	4.42	3.355	0.28	200	5.08	270	130	4.14	0.38	1.35	6.86	8.63	0.5	17	185	2.1	1.02	1.42	3.77	14.92	5.91	1.86	3.83	16.6	23.7	0.93	0.93	10.9	1	2	1	1	9	5
0	1	58	68.4	0.91	8.06	2.43	1.11	4.92	91.76	1.9	167	132	4.03	0.37	1.82	3.45	4.49	5	13.57	218	2.36	1.6	3.37	4.9394	11.24	2.14	0.19	3.62	16.5	27.1	1.07	0.84	13.2	1	1	1	2	19	5
0	0	72	60.6	0.89	8.18	2.48	2.46	0.42	150.94	2.15	320	136	4.56	0.89	2.12	4.55	7.22	0.5	21.42	261	1.26	1.1	2.28	3.4	15.96	0.8	0.42	2.78	17.7	26.4	0.88	0.88	10.3	1	2	1	1	1	3
0	1	61	59.4	1.29	15.35	5.47	1.404	0.34	234.29	6.54	246	138	4.4	0.36	1.05	6.87	8.31	0.6	15.27	364	2.23	1.4	0.82	4.38	7.71	1.87	0.42	1.56	15.6	24.1	0.89	0.89	10.4	2	2	2	2	7	3
0	1	78	67.9812	1.0341	8.457	2.7844	2.97938	2.22	121.67	1.94	146	145	4.67	0.54	1.2	2.33	7.45	2.208	10	255	2.28	1.31	1.19	4.13	6.15	0.56	0.34	3.54	16.7	23.9	1	0.93	11.2	2	1	1	2	12	3
0	0	65	88.8	1.35	9.89	2.59	2.66	7.28	71.13	1.3	207	152	5.27	0.4	2.91	3.78	7.43	1.5	18.15	316.59	1.13	1.9	1.03	3.5	6.474	4.28	0.61	3.62	17.739	25.4	0.92	0.93	9.8	2	1	1	1	2	2
0	1	71	77.9	1.35	8.87	3.1	11	0.15	96.91	1.57	157	153	4.77	0.25	1.62	2.54	4.57	1.451	11	244	2.68	1.8	0.92	4.9	5.32	2.41	0.52	2.31	18.7	31.2	0.99	0.99	11.6	1	2	2	2	1	4
0	1	79	64.4668	1.0456	7.5352	2.7114	2.64994	2.32	160.55	6.52	175	157	4.62	0.47	1.09	7.11	7.03	1.5	14.08	283.57	2.4285	1.3427	1.2981	4.7424	7.7277	0.8	0.327	3.86	16.6	24.1	2.23	0.97	10.1	1	2	1	2	16	1
0	0	65	36.1	0.85	7.18	2.65	3.91	0.18	68.53	1.61	98	125	3.96	0.26	1.43	2.3	4.04	1.1	10	296	2	1.16	1.48	4.16	7.41	3.21	0.35	2.48	18.9	26.9	1.11	1.1	12.9	2	2	1	2	3	4
0	1	56	69.5696	1.0777	8.7058	2.7688	2.35274	0.31	130	4.11	247	154	4.69	0.58	1.9	7.81	10.32	1.1	21.56	416	4.43	1.1	1.25	6.1	5.1	1.87	0.22	2.78	17.9	25.7	1.02	1.02	11.9	2	2	2	1	3	5
0	0	63	73.6	1.21	15.47	5.14	1.505	0.22	93.33	1.98	266	137	4.34	0.62	2.85	5.63	9.38	0.5	12	285	3.66	1.05	2.08	5.65	4.65	1.1	0.19	2.3	17.6	30.8	0.94	0.94	11	2	2	2	1	2	5
0	1	46	40.5	0.87	6.73	2.06	1.03	0.3	171.64	4.03	230	157	5.13	0.4	1.34	5.4	7.17	0.5	20.44	305.22	1.13	1.9	1.03	3.5	6.8737	1.6	0.61	3.37	17.7	22.1	1.02	1.02	11.9	2	2	2	2	6	5
0	0	68	67.1	1.48	8.05	3.4	4.73	0.12	98.67	1.12	223	124	4.23	0.26	2.26	2.52	5.25	0.4	10	253	3.03	1.54	0.86	4.96	5.83	2.14	0.57	2.03	18.3	24.4	0.89	0.89	10.4	2	2	2	1	4	5
0	1	71	79.1	1.23	9.51	2.93	2.18	0.28	165.67	2.66	222	142	4.64	0.37	1.34	3.56	5.44	2	15	274	2.39	1.15	1.23	4.1	5.26	1.87	0.74	3.02	16	28.2	1.01	1.01	11.8	2	2	2	1	2	1
0	0	57	66.3683	1.0442	8.2313	2.7612	3.61823	0.14	66.53	1.39	161	124	4.08	0.33	2.42	3.36	6.17	1.18	12.05	196	1.63	1.18	1.95	3.49	6.39	2.157	0.499	2.6147	22.008	27.411	0.95	0.95	11.1	1	2	1	2	9	5
0	1	47	82.4	1.17	8.58	2.59	2.23	0.14	56.14	0.9	256	146	5.16	0.64	4.56	4.11	9.66	1.4	12	233	3.21	0.93	1.28	4.72	4.55	1.6	0.19	3.53	17.3	27.9	0.82	0.82	9.6	2	2	2	1	3	1
1	1	86	68.5	0.73	9.46	2.16	2.43	0.61	278.38	4.34	206	135	4.12	0.45	0.74	3.21	4.71	3.2	71	334	2.72	1.19	0.65	4.2	4.7	1.07	0.25	1.35	19.2	35.1	1.16	1.15	13.5	2	1	2	2	9	5
1	0	76	9.27	0.76	18.2019	3.75	2.21	0.42	134.78	8.35	155	130	4.55	0.48	1.15	9.6	11.32	20.9	11	304	2.89	0.86	1.35	4.36	17.77	6.8	3.7	5.39	17.9	23.8	1.07	1.07	12.5	2	2	1	1	7	5
1	1	86	89	0.82	10.9	2.77	3.24	0.51	435.38	8.52	283	97	3.38	0.33	0.65	5.54	6.61	8.4	10	236.6	1.77	1.24	0.55	3.26	8.9198	7.67	2.15	3.53	19.1	29.1	0.99	0.99	11.6	1	2	1	1	1	3
0	1	81	64.7	0.72	10	2.51	0.84	0.11	149.59	5.87	181	156	5.06	0.13	1.21	7.1	8.46	0.8	15.23	331	2.84	1.5	1.01	4.8	7.69	0.9	0.29	2.73	19.2	26.3	0.91	0.91	10.7	2	2	2	1	4	1
0	1	67	4.87	5.26	16.67	6.12	3.41	0.41	201.04	4.69	193	126	4.49	0.39	0.96	4.5	5.99	4.9	9	383	1.66	0.8	0.9	2.87	4.47	1.13	0.26	3.67	18.8	27.6	0.92	0.92	10.8	1	2	2	1	2	3
0	1	79	67.6	1.07	8.02	3.06	2.25	5.07	104.23	2.59	148	146	4.67	0.28	1.42	3.68	7.72	2.4	12	240	6.51	1.71	1.41	8.86	7.04	0.53	1.34	3.3	17.3	26.4	0.94	0.92	9.6	2	1	1	1	4	2
0	1	67	81.35	1.2	15.99	4.48	2.03	2.16	112.12	4.35	148	132	4.37	0.61	1.32	5.74	4.51	0.5	17.46	274	1.36	0.63	0.94	2.6	4.6	34.8	0.31	3.82	17.3	27.8	0.95	1.07	10.8	2	1	1	2	4	5
0	1	74	4.19	0.85	8.41	2.43	5.93	0.22	137.82	1.7	215	114	3.56	0.34	1.56	2.65	4.87	2.854	23	429	2.29	0.93	1.09	3.92	4.25	4.28	1.21	2.09	16.8	26.4	0.98	0.98	11.5	2	2	2	1	9	1
0	0	90	81.5	0.87	9.71	2.75	2.26	0.32	111.97	3.51	159	105	3.39	0.45	1.42	4.99	6.96	1.3	14.58	197	2.1	1.7	1.81	4.62	6.09	2.6	1.14	2.69	16.8	25.9	0.88	0.88	10.3	1	2	2	1	2	5
0	1	45	69.8493	1.0285	8.7128	2.8389	3.02182	3.54	99.61	2.37	254	140	4.97	0.72	2.55	6.04	6.11	0.5	11	326	2.01	1.28	0.86	3.68	6.16	1.1	0.19	2.67	16.8	30.2	0.95	0.85	13.1	2	1	1	2	35	5
0	1	64	70.2863	1.0796	8.6508	2.8068	3.26945	7.21	35.61	0.8	172	142	4.49	0.67	4.83	3.88	10.56	16.3	12	295	2.71	1.72	1.13	4.95	5.17	2.8	0.38	3.08	16.6	25.5	0.92	0.89	10.6	2	1	1	2	4	3
0	1	51	71.6	0.97	9.34	3.01	3.67	0.45	137.33	6.4	206	163	5.23	0.67	1.5	9.6	11.91	4	25.13	326	0.02	1.1	5.02	8.36	14.07	0.53	0.19	2.44	15.6	28.2	0.91	0.91	10.7	2	2	1	1	12	4
0	1	38	37.6	0.78	7.95	2.2	2.57	6.79	116.75	1.23	230	146	5.16	0.29	1.97	2.42	9.66	1.4	28.75	508	0.48	1.8	1.37	2.9	5.71	1.07	1.01	3.19	18.2	30.9	0.96	0.97	10.9	1	1	1	1	2	1
1	0	72	8.74	4.96	17.76	5.77	2.99	0.54	85.06	6.32	131	138	4.6	0.83	1.54	9.74	12.47	4.7	16	316	2.85	1.18	2.78	5.29	9.98	1.69	0.8	4.2	17.6	26.7	0.85	0.85	10	2	1	1	1	4	1
0	0	69	54.8	0.88	7.94	2.5	1.64	0.19	101.72	1.94	177	150	4.62	0.33	1.74	3.37	5.48	0.5	47	300	1.98	0.93	1.4	3.52	4.83	1.87	0.22	1.94	18.9	27.7	0.98	0.98	11.5	2	2	2	2	6	5
0	0	53	81.5	0.83	8.7	2.26	2.82	0.22	131.13	2.46	198	138	4.98	0.33	1.51	3.72	5.68	1.37	12	390	2.31	0.87	2.33	4.24	5.98	0.8	0.23	3.08	18.2	29.2	0.92	0.92	10.8	2	2	2	1	4	3
0	1	78	73.9	1.07	8.47	2.83	3.33	0.29	150.77	2.53	196	156	4.67	0.38	1.3	3.29	5.06	0.7	18.32	299	0.99	2.5	0.9	3.9	6.9	5.08	1.34	3.45	15.4	26.1	0.89	0.9	10.5	2	2	2	1	5	1
1	1	83	51.7	0.74	8.11	2.32	1.93	0.37	303.48	4.75	349	118	3.8	0.43	1.15	5.46	7.07	12.2	18.46	359	3.46	1.2	0.96	5.1	6.89	12.63	3.64	4.75	16.4	28	1	1	11.7	2	1	1	1	5	5
0	1	56	84.7	1.03	9.06	2.83	5.64	0.32	89.66	2.53	156	154	5.1	0.56	1.74	4.4	6.9	0.4	17	278.51	0.93	0.98	0.98	2.36	5.2595	1.07	0.18	2.01	17.8	28.1	1.04	1.03	12.1	1	2	2	1	5	1
0	1	71	69.7	1.33	9.4	3.29	5.05	0.18	102.58	1.5	278	166	5.02	0.48	2.71	4.07	7.58	2.5	14	458	2.2	1.03	1.68	3.97	5.31	1.07	0.27	2.13	16.5	28.6	1.07	1.07	12.5	1	2	2	1	7	4
0	0	66	62.1	1.2	8.41	3.2	1.87	0.18	131.58	1.64	200	136	4.33	0.28	1.52	2.5	4.51	0.5	9	259	2.56	1.08	2.09	4.51	5.1	0.53	0.28	2.09	15.5	27.8	1.01	1.01	11.8	2	2	2	1	5	1
0	0	76	88.8	1.35	9.89	2.59	2.66	0.29	132.41	3.9	192	146	4.67	0.42	1.45	5.66	7.72	2.4	23	168	3.58	0.8	2.71	5.61	5.46	3.48	1.15	3.15	17.3	25.1	0.96	0.97	11.3	1	2	1	1	1	3
0	1	56	71.1991	1.0888	8.8616	2.7619	3.65592	3.48	97.66	3.32	292	153	5.17	0.86	2.99	9.93	6.74	3.1	13	295	1.59	1.03	1.17	3.15	4.7	4	0.4	4.91	18.9	26.4	0.79	0.93	10	1	1	1	1	2	1
0	0	72	88.8	1.35	9.89	2.59	2.66	0.27	154.32	3.23	250	120	4.15	0.44	1.62	5.23	7.44	2.195	9	202	1.35	1.01	1.15	2.88	4.25	0.8	0.25	3.62	17.6	28.9	0.97	0.97	11.4	1	2	1	1	0	3
0	1	70	81.5	0.83	8.7	2.26	2.82	3.42	161.32	3.96	171	116	3.82	0.31	1.06	4.2	4.01	0.5	20.87	485	1.82	1.1	2.38	4	7.56	3.74	0.2	2.69	17.1	24.6	1	0.94	11.7	1	1	2	1	4	1
1	0	69	96.8	0.97	11.19	2.59	11	0.56	225.51	6	221	132	4.35	0.55	0.98	5.88	7.54	4.9	13.5	243.75	3.04	1.55	0.9	5	19.2	4.81	1.7	3.02	17.2	23.2	0.93	0.93	10.9	2	2	1	2	7	3
0	1	78	48.4	0.94	9.14	2.79	2.6	1.49	117.86	4.21	132	130	4.55	0.75	1.12	4.72	11.32	20.9	21.42	280	1.25	1.2	1	2.9	6.63	2.94	0.8	2.66	15	35.1	0.9883	0.97	9.9	2	1	1	2	15	1
0	1	56	9.87	1.93	13.36	7.05	0.007	0.31	130	4.11	247	154	4.69	0.58	1.9	7.81	10.32	1.1	22.29	416	4.43	1.1	1.25	6.1	5.1	1.87	0.22	2.78	17.9	25.7	1.02	1.02	11.9	2	2	2	1	10	5
0	0	73	75.8	1.26	10.7	3.19	6.64	0.19	115.11	2.69	160	155	5.03	0.27	1.39	3.74	5.65	1.2	11	266	1.05	1	0.97	2.57	4.79	0.37	0.21	2.13	17.9	34	1	1	11.7	2	2	2	1	5	5
0	1	79	89	0.82	10.9	2.77	3.24	0.57	118.95	3.36	113	155	4.85	0.54	0.95	3.19	4.74	12.1	16	370	1.87	0.85	1.24	3.29	5.33	3.2	0.72	3.75	17.6	23.7	0.9	0.9	10.5	2	2	2	1	4	1
0	1	82	68.5162	1.0923	8.8317	2.8193	3.61154	0.18	104.41	3.22	237	122	4.02	0.41	2.27	7.3	10.02	0.5	12.07	272.67	2.4587	1.3691	1.5718	4.7034	7.4385	6	1.93	3.56	17.4	23.9	0.81	0.81	9.5	1	2	2	2	5	5
0	1	52	70.0743	1.0792	8.737	2.8316	2.92369	5.38	71	1.57	191	138	4.67	0.5	2.69	4.21	8.35	3.7	23	268	2.22	1.05	1.54	3.97	5.41	2.67	0.18	2.67	17.5	27.2	1.01	0.89	10.8	1	1	1	2	3	5
0	0	75	55	1.07	8.09	2.32	2.8	0.21	172.59	1.59	233	118	3.8	0.29	1.35	2.14	3.9	1.9	11	259	2.99	1.21	1.15	4.72	4.04	0.8	0.66	2.03	17.3	27.2	0.98	0.98	11.5	1	2	2	1	0	1
0	1	70	65.5	1.2	8.28	3.21	2.2	0.63	112.03	1.75	149	145	4.51	0.84	1.33	2.33	4.55	1.7	24.93	297	0.77	1.4	2.04	3.1	6.47	0.8	0.27	2.35	15.8	25.9	0.89	0.9	10.5	2	2	1	1	23	5
0	0	74	70.8499	1.0422	8.552	2.719	2.9453	4.08	115.09	3.21	183	145	4.51	0.39	1.59	5.1	4.55	1.7	12.76	283.25	2.4209	1.3385	1.2818	4.7453	5.9138	0.75	0.84	3.58	17.322	28.3	0.86	0.98	11.3	2	1	2	1	4	5
1	1	72	69.8669	1.036	8.7442	2.8147	2.73509	0.41	115.57	3.39	193	139	4.62	0.69	1.67	5.66	8.26	2.451	10	313	2.27	1.29	1.24	4.12	10.29	1.65	0.51	2.67	18.7	25.8	0.94	0.94	11	2	2	1	2	13	3
0	0	90	69.4252	1.1146	8.7749	2.849	3.39899	0.22	92.48	1.21	209	142	4.63	0.5	2.26	2.74	5.55	2.3	12.01	301.24	2.4105	1.3732	1.3303	5.0297	4.9058	2.55	0.78	2.63	18.1	27	0.89	0.9	10.5	2	2	2	1	4	1
0	1	52	64.2	1.16	9.03	2.91	2.86	0.2	161.21	1.39	345	142	4.53	0.42	2.14	2.97	5.75	2	13	363	1.72	1.37	2.29	4.13	8.19	1.87	0.53	3.08	16.2	27.3	0.94	0.94	11	1	2	1	1	4	4
1	0	86	60.9	0.93	9.41	2.6	2.89	2.07	220.43	11.42	205	152	4.57	0.45	0.93	10.62	6.08	7.559	9	206	1.61	0.73	1.5	3.23	9.93	0.27	0.19	3.15	16.4	31.3	1.11	0.99	10.9	2	2	1	2	20	3
0	0	66	67.3124	1.0837	8.5508	2.782	3.3246	0.17	111.68	1.83	239	128	4.39	0.36	2.14	3.92	6.52	0.7	19.79	293	0.4	1.2	5.94	4.3	6.51	0.9	0.48	2.45	16.4	23.7	0.82	0.82	9.6	2	2	1	1	3	3
0	1	70	6.24	5.33	14.2	5.82	0.99	0.56	190.27	4.67	215	143	4.62	0.63	1.13	5.28	7.09	0.5	10	264	3.3	1.06	1.2	4.9	6.06	2.07	0.44	2.76	17.9	25.3	0.9	0.91	10.6	2	2	2	2	10	1
0	1	65	65.5992	1.0147	8.0062	2.6637	4.04292	0.25	114.41	2.64	135	122	3.48	0.29	1.18	3.11	4.63	16.9	22.96	274	1.36	0.63	0.94	2.6	4.6	0.76	0.31	3.19	15.9	31.8	1.01	1.01	11.8	2	2	2	2	8	5
0	0	79	72.9	1.05	9.15	2.4	7.03	0.24	152.67	3.63	200	138	72.8	0.31	1.31	4.75	6.53	1.3	14	298	3	1.11	2.51	5.25	5.9	2.55	0.84	3.13	17.3	29.5	0.96	0.97	11.3	1	2	2	2	9	1
0	1	60	52.1	0.95	6.12	2.57	3.02	0.58	334.69	29.29	164	118	3.66	0.85	0.49	14.35	6.13	3.1	22.89	304.89	2.4659	1.428	1.8447	5.4083	9.9471	1.87	0.19	1.56	18	26.2	1.34	0.95	16.4	1	1	1	2	11	5
0	1	57	68.7992	1.0525	8.8109	2.6719	2.92598	3.11	116.84	4.54	229	118	3.81	0.63	1.96	8.9	6.6	40.5	22.64	501	1.44	1.1	1.68	3.3	6.17	2.267	1.18	3.12	17	27.5	0.9549	1.0408	10.6	2	1	2	2	17	1
0	0	58	66.6866	1.0998	8.4002	2.85	3.77355	0.11	76.95	0.77	197	136	4.54	0.28	2.56	1.96	4.9	0.9	13.13	328.71	2.4109	1.373	1.5162	4.9007	5.3397	1.7	0.84	2.53	18.4	26.7	0.79	0.79	9.2	2	2	2	1	3	5
0	0	74	82.1	1.02	9.97	2.79	2.51	0.14	120	3.14	168	145	4.78	0.2	1.4	4.39	6.07	2.635	13.2	249	2.4445	1.4144	1.9825	5.0101	34.33	2.94	0.52	2	19.8	26.8	0.92	0.92	10.8	2	2	1	1	10	1
0	1	56	10.24	5.16	21.79	5.85	1.04	0.33	137.12	3.67	181	157	5.27	0.44	1.32	4.84	6.94	1.4	10	229	2.43	1.14	2.86	4.86	11.13	0.94	0.19	4.41	16.9	24.8	0.85	0.85	10	2	2	1	1	0	5
1	0	55	6.98	7.13	12.47	3.57	0.69	1.33	233.96	24.84	248	126	5.08	1.41	1.06	26.33	28.84	22.9	16.04	340	3.43	1.4	1.34	5.44	6.29	2.1	0.62	3.3	16.8	23.6	0.87	0.87	10.2	2	2	2	1	16	5
0	1	70	58.5	1.04	7.49	3.51	1.95	0.33	101.1	2.47	183	152	4.79	0.59	1.81	4.47	7	1.537	10	255	2.28	1.31	1.19	4.13	6.15	1.1	0.34	2.96	17.7	27.2	0.94	0.94	11	2	2	1	1	5	5
0	0	57	66.9095	1.0163	8.3179	2.8141	3.32356	0.36	215.56	5.32	194	136	4.85	0.32	1.42	2	3.85	4.4	11	331	2.71	1.06	1.63	4.38	5.55	0.47	0.24	2	16.7	30.3	0.97	0.97	11.4	2	2	2	2	4	5
0	0	64	6.91	7.68	16.93	5.08	2.36	0.17	208.16	3.37	306	124	4.13	0.25	1.47	4.96	8.2	9.7	14	397	1.26	1.32	1.61	3.31	4.99	7.25	1.8	3.38	18.4	25.2	0.84	0.85	9.9	1	2	2	1	4	5
1	1	58	73.0538	1.312	8.8798	2.6411	25.8799	0.27	236.54	2.56	246	129	4.38	0.28	1.04	2.66	4.05	6.566	12	337	8.4	1.19	1.79	10.41	7.08	1.13	0.39	4.53	18.7	27.9	0.93	0.93	10.9	2	2	1	1	16	3
0	1	62	67.5464	1.0939	8.5468	2.8426	2.97297	0.2	80.65	1.8	200	164	5.28	0.5	2.48	4.46	7.6	1.381	16.66	320	2.44	1.13	3.71	4.35	5.47	0.8	0.22	2.06	18.5	27.9	0.96	0.97	11.3	2	2	2	1	2	5
0	1	42	9	3.92	17.67	3.82	0.49	4.15	146.1	5.78	206	136	4.52	0.34	1.41	8.15	4.71	2.1	11	241	2.76	1.22	1.19	4.52	4.75	1.51	0.19	2.61	17.7	27.2	0.95	0.95	11.4	2	1	1	2	6	1
0	1	53	12.32	2.14	20.58	7.61	0.01	4	154.88	5.2	254	141	4.54	0.41	1.64	8.53	4.56	2.3	15.25	316.37	3.48	2.6	1.81	6.9	9.1513	0.53	0.73	4.11	17.8	26.7	1.08	0.92	10.6	2	1	1	2	12	3
1	0	76	64.7	0.72	10	2.51	0.84	0.51	267.69	8.28	174	130	3.99	0.33	0.65	5.38	6.38	0.4	31	314	2.25	1.03	1.58	4	11.47	2.94	0.69	3.53	17.8	25.6	0.96	0.96	11.2	2	2	1	1	5	1
0	1	59	55.4	0.96	7.9	3.16	3.27	0.16	131.02	2.11	283	122	4.27	0.35	2.16	4.55	7.16	2.9	9	274	2.73	1.12	3.02	5.22	4.25	1.07	0.29	2.53	17.2	27.6	0.94	0.94	11	2	2	2	1	4	5
1	1	83	50.1	0.69	14.85	3.65	0.662	0.19	241.35	5.61	251	164	5.34	0.2	1.04	5.83	7.08	0.6	21.91	420	3.4	1.3	0.65	6.32	10.04	12.48	4.75	2.73	16.4	26.4	1.08	1.08	12.6	1	2	2	1	14	1
0	1	45	68.67	1.0411	8.7435	2.7162	3.13181	0.23	121.77	2.34	151	144	4.41	0.28	1.24	2.9	4.51	0.5	14	387	2.09	0.78	1.72	3.65	5.61	0.75	0.27	3.02	16.5	27.4	0.88	0.88	10.3	2	2	2	2	3	3
1	0	91	58.624	1.0405	8.0371	2.9649	4.47239	0.43	135	4.12	81	110	3.36	0.26	0.6	2.47	3.38	5.1	17.93	235	1.52	1.2	0.61	3	5.14	13.22	3.17	2.58	16.5	30.4	1.11	1.11	13	2	1	2	2	4	2
0	0	77	90.3	0.65	17.61	3.59	1.732	0.25	299.17	4.69	362	86	3.08	0.3	1.21	5.68	7.34	4.377	7	215	2.6278	1.3589	1.2739	4.8236	10.7795	4.6013	1.1689	3.0073	17.745	27.178	0.9487	0.9519	11.028	2	2	1	1	3	4
0	0	81	69.8626	1.0601	8.6055	2.5987	4.34132	0.22	288.8	3.22	361	128	4.08	0.27	1.25	4.03	5.61	1.3	15.18	294	2.61	0.8	2.26	4.44	8.7	1.9	0.76	3.23	18.6	23.6	0.89	0.89	10.4	2	1	1	1	5	5
0	0	67	103.9	1.13	21.5	4.67	6.111	0.14	85.97	1.33	190	120	4.11	0.3	2.21	2.93	5.48	1.1	12.25	273.96	2.4224	1.4598	1.3741	4.997	5.5931	1.1	0.21	2.67	19	27.1	0.87	0.87	10.2	2	2	2	1	7	3
0	1	70	8.21	51.4	17.49	6.29	2.46	3.69	145.83	2.06	210	151	5.47	0.39	1.44	2.96	15.7	0.8	14.66	262	4.13	1.2	1.52	6.02	7.01	4.52	0.48	3.37	18.5	25.9	0.91	0.95	10.7	2	1	1	2	3	3
0	1	75	9.74	1.62	14.8713	5.7	2.27	0.23	119.89	2.01	211	118	3.66	0.41	1.76	3.54	6.13	3.1	9	177	1.6	1.1	1.15	3.22	8.48	2.14	0.52	2.06	17.5	29.5	0.96	0.96	11.2	1	2	1	1	3	4
0	0	65	108.36	1.06	18.17	4.46	0.78	0.33	218.25	4.14	275	147	4.83	0.41	1.26	5.22	7.04	2.8	14	258	2.5	0.77	1.02	3.73	4.28	0.74	0.19	2.04	18.1	25.5	0.96	0.97	11.3	2	2	2	1	3	1
1	1	80	9	3.92	17.67	3.82	0.49	0.62	212.82	7.99	166	105	3.8	0.48	0.78	6.23	7.52	5.3	19.66	460	1.33	1.5	0.57	3.09	5.28	4.2	1.19	2.65	16.7	24.9	0.99	0.99	11.6	2	2	2	2	9	5
1	1	67	11.2	5	21.77	5.49	0.73	0.36	212.82	7.49	249	172	5.41	0.42	1.17	8.76	10.43	0.5	15	267	5.43	1.48	1.59	7.63	17.33	1.51	0.22	3.38	17.9	26.3	0.83	0.83	9.7	1	2	1	1	5	1
1	1	58	46.4	0.82	7.11	2.39	3.57	3.56	105.91	2.6	215	129	4.25	0.57	2.03	5.27	6.95	3.837	16	285	1.91	1.15	1.39	3.69	5.64	1.07	1.62	4.46	17.2	27.2	0.97	0.97	10.1	1	1	1	2	6	1
0	0	65	53.6	0.93	7.21	2.85	3.17	0.21	121.79	1.45	218	132	4.4	0.37	1.79	2.59	4.96	1.396	12	206	1.7	0.9	3.25	3.79	4.75	0.5	0.19	2.09	18.8	31.2	0.96	0.97	11.3	1	2	2	1	12	5
0	1	57	64.8	0.88	8.73	2.35	2.66	0.24	75.85	1.74	223	163	5.18	0.72	2.94	5.13	8.97	3.1	12.26	287.44	2.4231	1.4015	1.4638	5.3857	5.7205	2.2	0.56	3.23	17.8	27.2	0.83	0.84	9.8	2	2	2	2	7	5
0	0	63	61.8	0.92	7.6	2.86	5.99	5.33	112.5	1.92	180	136	4.52	0.3	1.6	3.07	7.61	13.8	14	225	2.59	1.1	2.01	4.6	11.74	2.14	0.35	2	19.4	26.5	0.9	1.03	11.4	2	1	1	2	9	1
0	0	69	75.2918	1.2096	9.372	2.8909	3.86422	0.2	129.02	2.06	409	139	4.76	0.64	3.17	6.54	10.48	5.4	14.7	254	5.63	1.6	2.35	8.3	15.26	1.07	0.24	2.68	18.1	29.8	0.89	0.9	10.5	2	2	1	1	1	5
0	1	72	67.1	1.48	8.05	3.4	4.73	6.84	48.5	0.95	242	76	2.66	0.73	4.99	4.73	4.83	0.5	24.07	266.17	3.03	1.5	0.82	4.9	6.2825	0.36	0.68	4.23	17.7	23.7	1.07	0.96	12.2	2	1	1	2	7	1
0	1	62	68.4	0.91	8.06	2.43	1.11	0.24	76.83	2.23	189	164	5.32	0.58	2.46	5.49	9.15	0.5	15	265	2.54	1.19	1.05	4.63	16.88	1.87	0.23	2.78	17.4	27.8	0.95	0.95	11.1	1	2	1	1	13	3
0	0	92	50.02	0.92	16.77	4.24	6.918	0.19	123.88	2.29	249	142	4.76	0.38	2.01	4.6	7.14	7.8	17	344	1.71	1.05	1.35	3.37	5.85	4.18	1.25	4.1	19.1	27.1	0.94	0.94	11	2	2	2	1	2	1
1	1	67	72.0376	1.0694	8.8171	2.6475	3.664	6.64	84.52	1.57	202	136	4.56	0.36	2.39	3.76	7.22	0.5	27	372	1.26	0.63	1.62	2.63	6.5	2.07	1.25	3.12	17	28.3	0.89	0.91	11.7	1	1	1	2	4	5
0	0	75	66.0623	1.063	8.1145	2.8071	3.43703	0.24	91.75	1.64	178	125	4.26	0.46	1.94	3.19	5.69	0.9	10.84	203	3.56	1.32	0.97	6	5.34	0.8	0.28	2.23	19.2	25.2	1.05	1.05	12.3	2	2	2	1	12	5
0	1	36	50.3	1.03	6.96	2.58	7.48	7.32	75.65	1.72	205	162	5.13	0.37	2.71	4.66	6.83	0.4	27.17	473	2.4805	1.3862	1.7274	4.9613	7.6027	1.87	0.67	3.33	18.8	24	0.92	1	9.9	2	1	1	1	3	2
0	0	61	64.6832	1.0628	8.356	2.7103	3.1787	0.18	102.19	1.36	280	149	4.71	0.49	2.74	3.74	7.08	0.5	9	225	3.46	1.55	2.14	5.84	6.01	0.44	0.2	3.52	17.8	28	0.96	0.96	11.2	2	2	1	1	5	5
0	1	52	5.28	1	12.91	5.35	2.92	2.35	129.13	6.06	164	157	5.02	0.54	1.27	7.69	10.87	80.8	9	280.13	2.11	1.9	3.05	5.4	11.297	0.8	0.18	4	17.9	23.7	0.89	0.88	10.7	2	1	1	2	2	2
0	0	67	73.4	1.39	9.88	2.86	5.22	0.13	130.56	1.25	235	122	4.34	0.24	1.8	2.25	4.57	1.421	10	204	3.43	1.28	1.79	5.52	4.57	0.8	0.52	2.16	17.5	26.3	0.93	0.93	10.9	2	2	2	1	4	1
1	0	86	43.26	0.55	10.14	3.48	63.95	0.52	101.86	5.19	164	157	5.02	0.83	1.61	8.36	10.87	80.8	15.15	227	2.39	1	0.9	3.8	6.21	34.8	11.35	5.44	15.9	29.7	1.07	1.07	12.5	1	1	1	2	7	2
0	0	75	84.4	1.12	15.76	4.89	3.23	0.21	119.67	2.62	146	140	4.82	0.26	1.22	3.2	4.81	3.8	17	254	2.36	1.07	1.35	4.04	7.56	0.94	0.34	2.67	17.8	25.9	0.89	0.89	10.4	2	2	1	2	3	5
0	1	82	73.859	1.0467	9.3638	2.7717	2.61142	0.43	141.74	5.35	163	140	4.38	0.5	1.15	6.15	7.95	3.068	19	390	1.36	1.04	1.26	2.97	5.42	3.95	1.11	2.76	18.4	26.7	0.84	0.85	9.9	2	2	2	1	7	3
0	0	60	79.5	0.92	16.41	4.42	13.216	5.22	87.46	3.77	251	127	4.36	0.55	2.87	10.82	6.43	0.9	14.19	303	1.92	2	1.05	4.4	6.6	0.53	0.19	3.62	17	28.2	0.99	1.09	10.2	2	1	2	2	6	5
0	1	74	59.5	0.89	9.45	2.69	1.74	1.06	169.33	5.43	127	130	4.34	0.71	0.75	4.07	6.48	16.6	25.91	364.97	0.15	1.1	9.12	5.4	6.2775	1.07	0.2	3.53	18	25.9	0.96	1.03	11.6	1	1	2	2	4	5
0	1	76	60.336	1.0153	7.9925	2.831	3.62678	0.14	150.41	2.04	182	100	3.55	0.17	1.21	2.47	3.89	1.3	13.92	194	1.23	1.4	1.37	3.25	8.17	2.7	0.77	1.91	17.9	28.4	0.91	0.91	10.7	2	2	1	2	5	1
0	0	56	54.9	0.97	8.59	2.68	1.29	0.22	103.16	2.7	163	130	4.4	0.34	1.58	4.26	6.32	0.5	14	255	2.17	0.65	1.46	3.65	4.5	0.39	0.19	2.11	16.4	27.8	0.93	0.93	10.9	2	2	1	2	9	1
0	0	47	60.9	0.93	9.41	2.6	2.89	0.24	141.35	2.16	188	158	5.25	0.32	1.33	2.87	4.78	0.5	12.07	270.48	2.3834	1.4408	1.3017	4.7551	9.2656	0.52	0.19	2.03	18.6	27.6	0.91	0.91	10.7	1	2	1	1	4	5
0	0	74	55.5	0.89	8.36	3.19	3.01	0.28	110	1.34	220	118	3.89	0.56	2	2.68	5.3	0.5	14	257	2.3	1.01	1.42	3.96	4.31	1.1	0.27	3.52	18.1	27.1	0.97	0.97	11.4	1	2	2	1	7	3
0	0	62	67.5	1.1	9.1	3.18	4.23	0.18	192.55	1.65	181	121	3.86	0.17	0.94	1.55	2.73	3.5	11	393	2.28	1.09	2.36	4.27	5.09	1.34	0.26	2.35	17.8	25.9	0.95	0.95	11.1	1	2	1	1	6	5
1	0	81	76.3	1.08	9.58	2.83	3.02	5.63	93.33	1.96	126	150	4.89	0.24	1.35	2.64	5.5	6.9	18	486	2.49	0.83	2.3	4.37	6.63	2.67	4.72	2.4	18.2	25.7	1.04	0.97	11.6	2	1	1	1	9	3
0	1	66	88.6	1.26	11.1	2.86	2.58	0.22	91.29	1.4	241	170	5.29	0.59	2.64	3.7	7.08	2.1	15	312	4.16	1.47	1.16	6.15	4.57	2.41	0.69	3.37	17.1	25.5	0.88	0.88	10.3	2	2	2	1	4	4
0	1	69	77.9	1.35	8.87	3.1	11	0.28	104.74	1.85	199	141	4.88	0.53	1.9	3.51	6.11	0.5	17	294	3.94	0.82	2.3	5.81	17.05	0.8	0.39	3.08	17.3	28.5	0.94	0.94	11	2	2	1	2	2	3
0	0	73	67.6327	1.0794	8.4706	2.7892	3.39617	0.15	103.14	1.03	197	136	4.58	0.28	1.91	1.97	4.22	0.5	10	137	1.98	1.19	1.77	3.89	7.59	2.14	0.43	2.05	18.3	25.5	0.83	0.84	9.8	2	2	1	1	6	5
0	1	64	141.3	0.8	25.63	4.68	0.958	0.13	121.33	1.8	256	150	5.33	0.28	2.11	3.79	6.33	1	29	285	2.07	1.25	6.29	4.8	8.89	0.6	0.2	1.88	18.8	26.7	0.96	0.96	11.2	2	2	1	1	4	1
0	1	53	58.8	1.21	7.6	3.25	4.28	0.22	149.71	1.92	262	133	4.78	0.38	1.75	3.36	5.62	0.5	16	318	3.28	1.28	1.7	5.22	4.82	0.53	0.21	1.97	18	25.5	1	1	11.7	2	2	2	1	6	1
1	0	71	6.02	3.98	14.32	4.37	4.1	0.18	93.47	3.63	186	127	4.32	0.36	1.99	7.22	9.66	0.5	9	188	1.61	0.86	4.12	4.34	8.78	8.25	3.08	4.3	18.2	24.4	0.94	0.94	11	1	2	2	1	3	3
0	0	70	57.9	0.7	15.68	3.88	1.12	0.23	107.1	1.94	166	141	4.41	0.35	1.55	3.01	5.13	0.5	15	133	0.94	0.85	2.26	2.82	5.96	1.65	0.36	2.47	18.8	30.8	0.98	0.98	11.5	1	1	1	1	4	5
0	1	68	82.4	1.17	8.62	2.73	1.99	3.21	182.8	5.94	170	166	5.28	0.29	0.93	5.52	7.34	2.7	14.75	331	2.84	1.5	1.01	4.8	7.69	0.94	0.29	3.54	17.3	26.7	0.93	0.89	11.5	2	1	2	2	4	5
0	1	57	68.8497	1.0412	8.7456	2.7397	4.2114	0.21	158.56	1.76	176	137	4.91	0.23	1.11	1.95	3.46	0.5	8	204	1.73	0.83	1.43	3.39	6.62	0.53	0.23	2.23	17.3	29.1	0.89	0.9	10.5	1	2	1	1	4	1
0	0	57	76.6	1.1	9.76	2.9	2.53	0.2	150.75	1.36	303	118	4.49	0.41	2.01	2.73	5.28	0.5	10.24	229	3.44	1.6	3.71	6.94	9.29	1.27	0.27	2.09	17.3	26.5	0.9	0.91	10.6	2	2	1	2	2	4
0	0	60	87.11	1.14	9.11	2.67	1.5	0.25	195.08	3.16	238	124	4.14	0.3	1.22	3.85	5.44	0.5	9	178	2.99	1.23	1.3	4.81	5.58	0.51	0.24	3.25	17.5	27.3	0.9	0.91	10.6	2	2	2	1	9	1
1	0	47	83.4	0.72	10.2	1.32	26.6	9.55	63.1	1.06	265	120	3.97	0.44	4.2	4.47	7.58	2	23	168	3.58	0.8	2.71	5.61	5.46	4.28	1.15	3.05	17.1	27.783	0.99	1.03	8.8	1	1	1	2	1	2
0	0	60	68.3899	1.0672	8.3468	2.6491	2.71216	0.25	195.08	3.16	238	124	4.14	0.3	1.22	3.85	5.44	0.5	9	178	2.99	1.23	1.3	4.81	5.58	0.51	0.24	3.25	17.5	27.3	0.9	0.91	10.6	2	2	2	1	10	1
0	1	64	63.9	1.02	8.9	2.67	4	0.21	140.12	1.59	227	149	4.5	0.34	1.62	2.57	4.71	1	17.56	270	2.03	2	0.81	4.4	6.42	0.27	0.19	2.78	19	30.1	0.97	0.97	11.4	2	2	2	2	2	1
0	0	56	65.6	0.86	8.56	2.93	1.33	0.22	103.16	2.7	163	130	4.4	0.34	1.58	4.26	6.32	0.5	14	255	2.17	0.65	1.46	3.65	4.5	0.39	0.19	2.11	16.4	27.8	0.93	0.93	10.9	2	2	1	2	8	1
0	0	82	58.797	1.1645	6.73	3.07	1.6	0.16	67.29	1.59	181	151	5.44	0.43	2.69	4.28	7.54	0.5	17	239	2.9	0.91	2.47	4.57	6.84	1.6	0.65	2.63	17.7	32.1	0.99	0.99	11.6	2	2	1	1	6	5
1	1	56	84.1	0.9	9.18	2.36	2.13	1.08	198.61	8.03	286	142	4.09	1.55	1.44	11.57	14.64	89.6	15.41	295	1.99	1	1.5	3.67	5.65	4	0.51	4.28	20.5	29.4	0.93	0.93	10.9	1	2	2	1	11	5
0	1	79	66.4335	1.0686	8.1841	2.7544	2.88052	0.4	238.14	7.75	231	131	4.63	0.39	0.97	7.52	9.01	1.9	14	203	4.02	1.08	1.76	5.9	9.91	1.69	0.39	2.63	16.8	23.8	0.83	0.83	9.7	2	2	1	1	6	5
1	1	83	64.8	0.95	7.89	2.53	2.06	0.92	386.11	9.61	139	91	3.07	0.33	0.36	3.46	4.21	76.579	28.43	80	1.78	0.7	2.02	3.4	15.15	12.48	3.08	6.58	15.6	24.1	1	1	11.7	1	2	1	2	6	1
1	1	63	68.405	1.0946	8.4825	2.8401	3.61162	0.36	215.56	5.32	194	136	4.85	0.32	0.9	4.79	6.17	3.3	13.81	273.83	3.48	2.6	1.81	6.9	11.8043	0.8	0.73	1.57	17.1	24	0.88	0.88	10.3	2	2	1	1	2	5
0	0	68	59.5	0.89	7.72	2.32	3.37	0.4	136.59	1.61	112	131	4.25	0.33	0.82	1.32	2.48	5.1	9	165	1.64	1.09	0.75	3.38	7.42	1.07	0.19	2.68	19.4	31.9	1.02	1.02	11.9	2	2	1	1	7	5
0	1	69	71	1.05	6.84	2.53	0.948	0.55	212.2	4.29	261	130	4.4	0.68	1.23	5.28	7.35	4.892	12	263	2.7	1.06	1.5	4.44	4.27	1.34	0.61	3.8	16.6	27.6	1.04	1.03	12.1	1	2	2	2	2	3
0	0	85	51.8	0.88	6.51	2.42	4.64	0.33	165.94	1.62	229	157	5.09	0.46	1.38	2.24	4.14	2.7	19.63	331	1	1.4	1.31	3	7.8	2.14	0.44	3.22	17.5	28.1	0.99	0.99	11.6	2	2	2	1	3	5
0	1	79	70.4186	1.0925	8.7471	2.8195	4.24307	0.2	131.66	1.4	262	144	4.81	0.4	1.99	2.79	5.35	1.465	12.32	279.59	3.03	1.5	0.82	4.9	5.323	2.67	0.68	2.63	18.4	27.8	0.89	0.89	10.4	2	2	2	1	2	5
0	0	74	64.8	0.88	8.73	2.35	2.66	0.14	105.91	2.24	269	133	4.45	0.36	2.54	5.7	8.72	2.005	13.96	385	2.4858	1.3327	1.5593	4.4082	6.2298	1.34	0.43	3.08	17.8	24.2	0.93	0.93	10.9	1	1	2	1	9	2
0	0	51	85.9	1.42	9.86	3.65	2.06	0.27	183.21	3.69	240	161	5.55	0.35	1.31	4.83	6.64	1.5	10	249	2.48	1	1.05	3.96	5.33	1.07	0.18	2.09	17.9	30.9	0.92	0.92	10.8	2	2	1	1	4	5
0	1	59	64.5	0.95	7.89	2.53	2.06	0.24	133.33	1.76	220	144	5.04	0.39	1.65	2.91	5.07	1.5	5	264	2.07	1.28	1.58	4.07	6.55	0.53	0.18	3.29	18.1	27.2	0.97	0.97	11.4	2	2	1	1	2	1
1	1	57	78.4	1.01	9.44	2.42	2	0.34	232.58	3.7	307	152	5.2	0.45	1.32	4.89	6.78	1.3	43	391	2.62	0.75	1.52	4.05	5.73	1.8547	0.4712	3.0971	17.636	28.239	0.9525	0.9494	11.068	2	2	2	2	6	1
0	1	57	57.1	0.89	7.33	2.57	2.74	2.24	92.36	4.87	145	116	3.58	0.7	1.57	7.65	5.16	0.4	9	299	3.46	1.44	2.13	6.07	3.7	0.8	0.44	2.78	15.6	24.9	0.96	1.05	9.5	2	1	1	1	8	5
1	0	79	66.5265	1.0699	6.9322	2.6494	10.9529	0.49	124.35	6.9	143	125	4.3	0.56	1.15	7.93	9.84	0.5	14.36	260	2.33	1.8	1.45	4.79	7.36	1.7	49.35	3.91	17.4	25.7	0.81	0.81	9.5	2	2	2	1	10	5
0	0	69	2.16	2.69	8.79	3.25	13.87	0.23	164.91	3.72	188	169	5.22	0.26	1.14	4.24	5.69	3	17.39	320.29	2.4546	1.4199	4.4867	5.0164	7.7267	2.3	0.65	3.18	16.8	23.4	0.84	0.84	9.8	2	1	2	1	5	2
1	0	77	81.39	1.06	18.95	5.03	4.182	0.49	303.53	3.19	258	135	4.28	0.42	0.85	2.71	4.07	0.5	13	183	1.7	1.04	0.91	3.16	5.05	4.9	1.56	2.86	18.8	29.2	0.93	0.93	10.9	2	2	2	1	10	1
0	0	72	62.11	1.06	19.47	3.78	2.45	0.62	119.17	5.25	230	137	5.61	1.19	1.93	10.13	13.52	8.6	13.02	291.01	2.4435	1.35	1.4037	5.3248	6.9696	1.8	0.39	3.56	17.3	28	1.09	1.09	12.7	1	1	2	2	3	2
0	1	83	69.0982	1.075	8.8421	2.8814	3.44982	0.26	60.39	2.56	186	126	4.09	0.81	3.08	7.87	11.8	15.69	15.42	477	2.3975	1.3155	1.8327	4.7987	9.74	2.67	0.6	2.06	18.2	24.5	0.95	0.95	11.1	1	2	2	1	3	1
0	0	60	84.62	1.06	18.29	4.63	1.486	0.22	60.82	1.44	163	151	4.92	0.59	2.68	3.86	7.28	1.346	10	285	1.57	0.76	3.35	3.85	4.14	3.1	0.19	1.97	18.2	29.9	0.93	0.93	10.9	2	2	1	1	8	3
1	1	70	89.6	0.79	9.49	2.03	2.41	0.48	161.9	6.03	238	130	4.52	0.71	1.47	8.87	11.11	20.168	13	348	1.59	1.8	0.91	3.8	8.84	11.59	4.41	3.62	18.2	23.8	0.95	0.95	11.1	2	2	1	1	8	1
1	1	57	37.6	0.78	7.95	2.2	2.57	0.22	114.43	3.22	230	163	4.5	0.44	2.01	6.47	9.01	1.5	82	442	1.97	1.17	3.19	4.59	4.9	0.8	0.23	2.27	18.1	26.8	0.9	0.91	10.6	2	2	2	1	1	1
1	1	76	69.5	0.93	9.49	2.53	5.47	3.6	107.51	5.32	186	123	4.02	0.48	1.73	9.2	4.1	0.4	27.88	405	1.27	0.6	1.83	2.7	14.35	0.52	0.66	3.15	15.8	27.6	0.96	0.91	12.5	1	2	1	1	12	1
0	0	52	69.1	1.2	8.39	3.46	1.73	0.18	107.97	1.54	271	158	5.31	0.45	2.51	3.87	7.09	0.4	15	316	3.3	1.3	1.02	5.13	6.27	1.2985	0.3553	2.752	17.499	27.674	0.9556	0.9494	11.116	2	2	2	1	13	4
0	1	67	70.3294	1.0773	8.7402	2.8613	3.56579	5.44	86.21	1.19	150	164	5.28	0.32	1.74	2.07	7.6	2.736	13.98	298.5	2.43	1.421	1.3039	5.0107	6.268	2.6	1.93	2.25	18.8	27.419	0.88	0.88	12.3	1	1	2	2	4	5
0	0	80	55.1	0.86	7.12	2.6	1.99	0.29	161.8	3.29	144	121	3.59	0.26	0.89	2.93	4.13	0.5	23.49	309	1.08	1.9	1.37	3.6	8.87	0.53	0.19	1.68	18	30.3	1.01	1.01	11.8	1	2	2	1	5	4
0	0	74	67.7662	1.0721	8.7204	2.7672	3.65576	0.38	26.39	8.89	256	130	4.32	3.7	9.7	86.2	10.51	0.5	9	250	4.67	1.66	1.17	6.86	6.61	1.32	0.29	3.67	17.8	26.2	0.83	0.84	9.8	1	2	1	1	3	1
0	0	50	81.7	1.45	10.3	3.42	4.15	0.21	81.23	2	212	156	5.43	0.55	2.61	5.23	8.7	18.1	17	254	3.32	1.05	1.4	4.95	11.25	1.34	0.34	4.61	14.7	27.5	0.99	0.99	11.6	2	2	2	1	1	4
0	0	78	79.9	1.04	8.72	2.62	2.46	3.27	108.13	3.35	173	157	4.77	0.49	1.6	5.36	7.77	6.2	34.25	418	0.85	1.4	6.49	5.2	7.12	0.45	0.29	3.86	14.5	28.4	1.05	1.01	11.1	2	1	1	1	9	1
0	0	73	64.5442	1.0685	7.8736	2.7542	3.67618	0.21	225.19	1.5	295	131	4.64	0.28	1.31	1.97	3.67	1	9	239	3.99	1.04	2.85	6.59	5.53	0.53	0.39	2	17.6	27.5	1.01	1.01	11.8	2	2	2	1	2	1
0	1	82	52.6	0.84	2.33	2.58	8.33	0.22	114.93	2.02	231	114	3.92	0.45	2.01	4.07	6.83	0.5	26	455	4.84	1.78	6.4	8.71	3.38	1.34	0.64	1.97	18.9	30.8	1	1	11.7	2	2	1	1	4	5
1	1	80	79.1	0.6	10.2	2.06	1.83	0.59	651.79	9.71	365	129	4.54	0.33	0.56	5.44	6.43	144.4	14.63	216	3.01	1.3	1.51	5	7.12	5.51	2.57	6.58	16.7	29.2	1.08	1.08	12.6	2	2	2	1	8	5
0	0	80	8.55	4.17	15.05	5.32	0.5	0.31	74.62	4.05	147	141	4.44	0.62	1.97	7.98	10.58	0.5	14	184	2.53	1.36	0.88	4.3	4.08	2.63	0.57	2.3	19.4	27.2	0.85	0.85	10	1	2	2	2	2	3
0	1	59	71.8	0.87	16.02	5.23	1.95	0.22	133.33	3.34	240	145	4.4	0.39	1.8	6.01	8.31	3.8	14	305	3.07	1.43	1.21	5.05	4.88	1.1	0.19	4.01	17	26.6	0.89	0.89	10.4	2	2	2	1	2	3
0	1	61	72.8	0.92	8.33	2.63	2.51	0.18	102.19	1.36	280	149	4.71	0.49	2.74	3.74	7.08	0.5	11.93	285.48	2.4753	1.3966	1.3091	5.1451	6.8485	0.44	0.2	3.52	17.8	28	0.96	0.96	11.2	2	2	1	1	3	5
0	0	79	67.3411	1.043	8.5447	2.8207	3.93362	0.23	148.48	1.79	196	137	4.27	0.3	1.32	2.36	4.02	1.061	10	220	4.92	1.64	0.64	6.85	5.31	1.51	0.24	2.4	18.3	27	0.95	0.95	11.1	2	2	2	1	3	3
1	1	73	77.1	1.1	9.07	2.73	2.74	0.28	112.23	2.35	211	128	3.88	0.53	1.88	4.42	7	2.284	61	324	4.21	0.95	2.11	6.12	4.5	1.07	0.28	3.22	18.2	27.8	0.95	0.95	11.1	1	2	1	1	2	3
0	1	56	69.4046	1.0779	8.7428	2.7726	2.34174	0.31	130	4.11	247	154	4.69	0.58	1.9	7.81	10.32	1.1	21.68	416	4.43	1.1	1.25	6.1	5.1	1.87	0.22	2.78	17.9	25.7	1.02	1.02	11.9	2	2	2	1	5	5
0	1	67	67.5496	1.0401	8.4034	2.7803	2.6341	2.51	120.98	6.2	173	142	4.5	0.57	1.43	8.86	7.49	10.3	10	137	1.98	1.19	1.77	3.89	7.59	1.07	0.43	2.52	17.4	24.7	1.07	1.01	10.8	2	1	1	1	19	5
0	0	62	93.2	0.89	16.84	4.78	6.354	0.17	137.93	1.92	280	138	4.6	0.35	2.03	3.89	6.46	1.855	13	348	1.97	0.87	1.61	3.57	6.44	1.6	0.34	3.15	16.5	24.6	0.96	0.97	11.3	2	2	1	1	5	4
1	0	86	72.1456	1.0337	8.6589	2.7687	2.70053	0.36	543.18	12.7	239	122	3.77	0.16	0.44	5.59	6.2	5.7	14.04	193	1.96	1.8	0.73	4.09	5.97	10.3	2.71	3.8	18	27.8	0.91	0.91	10.6	2	2	2	2	17	1
0	1	81	76.4	0.7	13.83	3.94	0.352	0.43	218.63	5.01	352	132	4.53	0.69	1.61	8.07	10.42	5.188	11	472	1.9	0.85	1.54	3.49	4.29	2.01	0.46	3.38	18.1	30.2	0.97	0.97	11.4	1	1	2	1	3	2
0	1	47	5.02	4.33	19.52	4.56	4	0.13	64.68	1.28	260	153	4.97	0.51	4.02	5.15	9.8	22.956	12	293	4.32	1.18	4.78	7.67	5.51	2.26	0.19	2.51	17.8	25.2	0.77	0.78	9.1	2	2	2	1	4	1
1	1	46	96.23	0.6	18.48	3.5	3.226	0.36	298.67	4.91	224	76	2.66	0.27	0.75	3.68	4.83	0.5	27.9	91	1.34	0.8	1.71	2.92	11.93	3.5	0.89	1.07	17.8	33.5	0.94	0.94	11	2	2	1	1	11	5
0	0	77	51.2	1.13	7.72	3.11	7.11	0.23	146.92	1.67	310	133	4.34	0.48	2.11	3.53	6.47	1.1	12.53	274.99	3.46	2	1.1854	6.4553	5.7114	1.6	0.37	1.94	19	27.6	0.97	0.96	11.3	1	2	2	1	7	3
0	0	57	52.1	0.95	6.12	2.57	3.02	0.28	196.55	1.81	228	126	3.93	0.33	1.16	2.1	3.65	11.3	17.77	218	2.36	1.6	3.37	4.9301	11.24	0.27	0.19	4.35	16.7	25.5	0.99	0.99	11.6	1	2	2	1	2	5
1	1	72	7.41	6.59	17.38	5.89	0.74	0.21	133.06	4.05	161	138	4.21	0.26	1.21	4.9	6.51	0.5	25	268	1.93	1.45	0.58	3.64	5.26	2.07	0.41	2.27	18	25.2	0.92	0.92	10.8	1	2	2	1	12	3
0	0	76	10.33	0.9	19.74	4.74	0.89	0.2	205.66	3.25	218	125	3.6	0.21	1.06	3.45	4.8	3.3	14.35	258	2.4417	1.3429	1.9963	4.7125	21.33	0.8	0.28	3.08	17.5	25.3	0.93	0.93	10.9	2	2	1	1	3	5
0	1	70	67.0599	1.0628	8.2607	2.7316	3.4183	5.39	98.73	3.19	234	138.32	4.5404	0.44	2.37	7.55	6.0377	13.754	26	468	2.4606	1.2628	1.797	4.3227	5.7798	1.6758	1.31	4.06	17.3	32.84	0.921	1.33	10.7	2	1	1	2	15	1
0	0	68	67.5	0.89	8.76	2.36	3.39	0.22	118.12	2.83	163	125	4.12	0.3	1.38	3.9	5.63	4.4	6	303	2.58	1.41	1.06	5.02	4.54	0.8	0.24	2.41	17.7	26.2	0.93	0.93	10.9	2	1	2	1	2	4
0	0	56	69.3684	1.0274	8.7481	2.8058	3.32232	0.16	93.17	1.98	150	142	4.62	0.25	1.61	3.19	5.19	0.4	12.94	271.25	2.3741	1.3738	1.3518	4.5809	8.3623	0.36	0.24	2.07	18	25.7	0.96	0.96	11.2	2	2	1	1	2	5
0	0	62	68.6721	1.0529	8.8013	2.831	3.46155	1.9901	122.446	2.5996	204.36	140.83	4.599	0.5061	1.6803	4.5241	5.8954	1.845	11	382	1.43	1.18	2.32	3.66	6.55	1.07	0.29	2	21.6	29.9	0.96	0.96	11.2	1	1	2	1	4	2
0	1	61	69.4	1.1	8.68	2.94	1.72	5.38	90	2.61	126	136	4.76	0.26	1.4	3.66	12.16	4.2	14.72	198	2.12	1.3	1.49	4.1	18.42	0	0.43	1.75	16.8	28.1	0.97	0.93	10	2	1	2	1	2	1
1	1	78	72.6873	1.318	8.8126	2.6534	25.6636	1.11	278.08	13.67	203	147	4.8	0.81	0.73	9.98	11.54	2.6	28.06	469	8.36	0.9	2.75	10.51	4.81	2.4	0.74	4.72	16.1	26.2	1.03	1.03	12	2	2	2	1	6	1
0	0	91	59.3	0.82	8.4	2.29	0.456	0.74	180.53	7.57	204	116	3.87	0.84	1.13	8.55	10.62	12.7	26.28	140	0.16	1.5	0.75	2	5.57	2.41	0.77	2.53	17.5	34.4	1.15	1.15	13.4	1	1	2	2	5	5
1	0	74	65	1.02	6.54	2.35	1.79	0.19	120.83	1.35	174	95	2.96	0.27	1.44	1.94	3.78	2.1	34	180	3.32	1.1	1.05	4.9	7.02	1.6	0.42	2.2	17.6	27.5	0.97	0.97	11.4	1	2	1	2	4	5
0	0	71	47.1	0.72	9.47	2.18	1.96	0.23	169.27	2.47	303	147	4.78	0.42	1.79	4.42	6.76	4.8	12.41	304.53	2.5858	1.3817	1.2552	5.0922	5.4519	1.6	0.68	3.71	17.7	30.2	0.92	0.92	10.8	2	2	2	2	8	5
0	0	61	66.9482	1.0192	8.4518	2.7592	2.86716	0.5	163.33	4.48	147	119	3.76	0.45	0.9	4.03	5.57	3.9	12.48	276.32	2.4005	1.4439	1.2336	4.9476	8.9234	0.53	0.2	3.02	18.8	24.4	0.93	0.93	10.9	2	2	1	1	9	5
0	1	53	68.4648	1.0344	8.7833	2.7341	3.43267	0.3	95.68	1.98	177	171	5.75	0.55	1.85	3.66	6.29	0.5	21	281	2.13	0.79	2.03	3.81	10.72	0.53	0.2	1.66	18	29.6	1.01	1.01	11.8	2	2	1	1	6	1
0	0	68	40.5	0.87	6.73	2.06	1.03	2.16	116.91	2.9	159	97	3.38	0.63	1.36	3.95	6.61	8.4	10	204	3.43	1.28	1.79	5.52	4.57	3.48	0.52	3.85	17.5	28.1	0.96	0.97	11.1	2	1	1	1	4	3
0	1	78	58.5	1.04	7.49	3.51	1.95	0.28	50.37	1.79	68	116	3.69	0.38	1.35	2.42	4.26	5.369	14	260	1.82	0.93	1.06	3.23	4.97	0.53	0.35	3.08	17.7	28.1	1.05	1.05	12.3	2	2	2	2	1	1
0	0	78	63.4	1.07	7.84	3.08	8.65	0.23	103.33	1.43	124	110	3.5	0.27	1.2	1.71	3.24	1.2	8	276	2.44	1.35	1.06	4.83	5.49	0.27	0.26	2.31	17.3	31.5	1.01	1.01	11.8	2	2	2	1	2	4
0	0	78	86.1	1.1	9.51	3.02	2.78	0.28	143.94	4.35	190	140	4.57	0.37	1.32	5.74	7.48	6.8	23.6	424	2.21	1.1	3.27	4.8	13.26	1.87	0.53	2.96	18	26.2	1	1	11.7	1	2	1	1	3	5
1	1	79	53.7	0.88	6.66	2.6	2.85	0.24	198.47	6.47	260	135	4.24	0.31	1.31	8.47	10.1	3.6	22.2	338	3.42	1.3	1.05	5.2	9.59	2.67	0.95	3.02	16.7	25.9	1.22	1.21	14.2	2	2	2	1	16	1
0	1	48	68.7	0.61	13.6	3.51	1.33	175	121.71	5.8	213	142	4.09	0.01	1.75	10.15	14.64	89.6	16.38	262	1.17	1.09	0.89	2.9	5.26	3.09	0.69	4.06	17	25.3	0.9	0.91	10.6	2	1	1	1	10	5
0	0	81	69.8	0.87	8.77	2.31	1.49	6.08	93.42	1.32	227	131	4.3	0.4	2.43	3.21	6.39	1.2	7	328	3.13	1.35	1.21	5.27	5.3	1.07	0.49	2.81	17.5	27.091	0.83	1.02	10.7	2	2	1	2	16	1
1	1	73	120	1.21	11.19	2.64	4.15	0.28	112.23	2.35	211	128	3.88	0.53	1.88	4.42	7	2.315	61	324	4.21	0.95	2.11	6.12	4.5	1.07	0.28	3.22	18.2	27.8	0.95	0.95	11.1	1	2	1	1	2	3
0	0	48	68.0473	1.0683	8.4399	2.7332	3.41538	0.7331	124.014	2.5912	210.63	142.78	4.612	0.5115	1.7004	4.5084	6.8673	5.365	15.17	272.44	2.4704	1.3853	1.4543	5.1571	7.2512	0.38	2.24	3.25	17.1	27.5	0.79	0.79	9.3	1	2	1	1	15	3
1	1	62	71.4	0.79	25.06	4.86	1.846	0.44	122.67	4.65	184	141	4.56	0.66	1.5	6.97	9.83	3.726	9	290	2.35	0.98	1.79	4.14	4.3	3.1755	1.1006	3.2735	17.709	27.317	0.9571	0.9559	11.079	2	2	2	1	13	3
0	0	64	67	0.89	8.91	2.35	0.999	0.22	166.49	1.75	318	133	4.56	0.42	1.91	3.35	5.83	5	8	175	3.34	0.95	1.97	5.19	8.38	1.1	0.1	4.35	17.7	27.6	1	1	11.7	2	2	1	1	3	3
0	1	58	64.8462	1.1136	8.1779	2.5916	3.65879	0.21	100	1.94	192	141	4.67	0.4	1.92	3.72	6.2	0.5	8	276	2.84	0.66	4.82	5.69	4.31	2.63	0.28	3.83	16.5	26.1	0.82	0.82	9.6	2	2	1	2	9	3
0	1	72	72.7	1.24	8.11	2.99	1.55	4.65	53.64	2.38	177	145	4.4	0.71	3.3	7.86	8.31	3.8	16	282.73	1.9	0.99	1.12	3.4	6.72	0.27	0.22	3.65	17.763	26.2	0.89	0.93	11.5	2	2	1	2	6	1
0	1	77	71.4784	1.0786	8.7458	2.782	3.66286	8.47	63.35	1.48	204	119	3.76	0.38	3.22	4.78	5.57	3.9	13	262	2.93	1.05	1.12	4.49	6.1	6	0.41	2.95	16.8	30.3	0.85	0.81	12.2	2	1	1	2	9	2
0	1	71	68.7	0.61	13.6	3.51	1.33	0.22	104.55	2.38	184	154	4.99	0.38	1.76	4.19	6.41	3	19.72	485	4.46	1.2	1.54	6.36	5.94	6	0.77	2.86	17.5	29.2	0.94	0.94	11	1	2	2	1	3	3
0	1	64	62.4	1.05	18.95	5.03	1.27	0.26	108.72	2.98	162	153	4.99	0.39	1.49	4.44	6.67	1.5	17	407	2.37	0.83	1.69	3.97	4.43	2.19	0.47	2.86	17.9	29.8	0.92	0.92	10.8	2	2	2	1	2	1
0	0	87	69.8501	1.0749	8.4498	2.7861	3.21392	1.99	141.03	2.52	275	126	3.93	0.98	1.95	4.91	3.65	11.3	12	224	3.04	1.39	1.02	5.19	5.12	1.6	0.61	3.61	18.2	25.2	0.96	0.88	10.7	2	1	1	2	4	3
1	1	67	68.9484	1.0476	8.6735	2.7534	3.02775	0.8061	122.992	3.4205	206.48	164	5.32	0.5446	1.6971	5.7307	9.15	0.5	8	250	2.53	0.94	0.88	3.84	6.62	0.53	0.28	3.3504	16.1	26.1	0.98	1.01	11.676	2	2	1	1	16	5
0	0	83	65.4	1.09	7.62	2.69	3.55	0.26	126.74	3.62	218	140	4.66	0.44	1.72	6.22	8.45	0.5	14.27	299	2.89	0.9	3.98	5.6	14.38	1.87	0.48	2.73	18.2	27.8	0.92	0.92	10.8	2	2	1	1	2	5
0	1	54	93.5	0.97	21.73	4.53	2.276	0.28	277.98	6.94	303	155	4.95	0.3	1.09	7.56	8.99	2.3	11.47	250	2.93	1.4	0.81	4.7	6.41	1.07	0.25	2	16.6	24.7	0.91	0.91	10.7	2	2	2	1	3	3
0	1	85	58.2	0.83	58.2	0.83	9.86	0.36	88.89	2.52	184	140	4.5	0.74	2.07	5.21	8.2	3.6	12	221	2.29	1.57	0.8	4.37	4.47	5.94	1.56	2.03	16.4	34.9	0.98	0.98	11.5	2	2	2	2	3	5
1	0	86	59.8949	1.0538	8.2525	2.6683	3.70138	0.2	77.32	2.56	150	73	2.1	0.38	1.94	4.97	8.44	37.6	19.53	552	1.41	1.7	1.24	3.67	9.19	7.7	2.05	4.89	16	28.2	0.91	0.91	10.7	1	2	1	1	10	3
1	1	71	70.7378	1.073	8.6444	2.7625	2.89289	0.6	375.47	14.43	199	164	5.36	0.32	0.53	7.65	8.52	1	11	219	4.38	1.29	1.03	6.14	8.33	1.88	0.42	3.52	17.3	23.8	0.92	0.92	10.8	2	2	2	1	9	5
1	1	61	66.2	1.0651	8.3108	2.6901	2.78937	0.58	206.25	6.39	198	133	4.2	0.56	0.96	6.13	7.73	73.2	14.49	348	2.91	1.9	2.46	5.9	7.88	3.1	0.55	6.13	16.1	24.3	0.84	0.85	9.9	2	2	2	1	15	5
0	1	66	82.4	1.17	8.58	2.59	2.23	4.08	47.14	2.02	206	154	5.1	1.07	4.37	8.84	6.9	0.4	5	264	2.07	1.28	1.58	4.07	6.55	12.92	0.18	2.11	18.3	27.8	0.89	1.08	10	2	1	1	2	23	1
0	0	84	82.9	1.11	9.21	2.72	2.56	5.74	139.29	2.48	312	146	4.62	0.39	2.24	5.55	6.8	1.2	9	303	3.04	1.31	1	4.8	4.67	1.34	0.19	4.59	17.8	24.7	0.95	1.03	10.5	2	1	1	1	10	1
0	0	74	71.82	1.17	15.75	4.36	2.37	0.28	110	1.34	220	118	3.89	0.56	2	2.68	5.3	0.5	14	257	2.3	1.01	1.42	3.96	4.31	1.1	0.27	3.52	18.1	27.1	0.97	0.97	11.4	1	2	2	1	3	3
0	1	77	59.5	0.89	9.45	2.69	1.74	0.3	159.79	4.08	155	121	4.15	0.29	0.97	3.96	5.3	2.1	22	130	1.27	1.27	0.67	2.84	10.77	0.54	0.18	2.13	17.6	26.4	1	1	11.7	1	2	1	1	1	1
0	0	53	67.808	1.0613	8.3957	2.7514	3.45908	4.57	133.73	1.76	226	131	4.25	0.37	1.69	2.97	2.48	5.1	8	204	1.73	0.83	1.43	3.39	6.62	1.07	0.23	2.76	17.4	25.5	0.96	1.05	10.3	1	1	1	1	3	3
0	0	82	7.44	1.66	11.52	5.55	6.4	0.32	157.58	3.01	156	129	4.26	0.32	1.21	3.79	5.61	1.2	15	278	2.67	0.74	1.44	4.01	5.93	2.14	1.01	2.58	16.8	28.3	1.04	1.03	12.1	2	1	1	1	1	5
1	0	80	70.8964	1.0508	8.7878	2.7599	3.11295	0.44	156.39	6.11	208	117	3.89	0.58	1.33	8.12	10.17	2.1	20.74	480	3.62	1.1	1.2	5.27	9.41	12	2.94	2.69	17.6	25.4	0.92	0.92	10.8	2	2	2	1	24	1
0	0	85	82.11	1.17	8.52	2.82	1.95	0.21	120.33	2.21	219	124	3.96	0.38	1.82	4.02	6.34	0.4	13	337	3.22	1.76	1.2	5.53	6.1	2.41	0.58	2.5	19	24.6	0.93	0.93	10.9	2	2	2	1	7	5
0	1	82	59.5	0.89	7.72	2.32	3.37	3.5	115.13	5.82	137	121	3.77	0.34	1.19	6.93	11.98	83.5	12.89	205	2.28	1.8	0.93	4.5	12.69	1.34	1.15	4.03	19.3	29.5	0.95	0.96	12.3	2	2	1	2	5	5
0	1	56	75.6	1.24	18.2	4.46	1.333	3.28	81.48	1.88	198	110	3.62	0.74	2.43	4.57	5.74	3.335	14.29	194	1.23	1.4	1.37	3.25	8.17	2.19	0.77	3.9	16.5	23.9	0.99	1.03	10.4	2	1	2	2	5	5
0	0	86	67	1.08	8.35	2.66	6.27	0.3	168.07	3.17	279	119	4.04	0.5	1.66	5.26	7.54	2.2	24.69	454	1.47	1.2	2.93	4	6.14	1.34	0.36	2.84	16.4	26.6	0.96	0.96	11.2	2	2	2	1	4	5
0	1	64	57.6	1.04	7.47	2.79	8.81	0.24	96.24	1.81	179	139	4.39	0.44	1.86	3.36	5.83	2	15	321	1.01	0.85	2.31	2.35	4.45	0.53	1.82	1.44	18.4	32.8	1.03	1.03	12	1	2	2	1	4	1
1	1	77	63.5	0.91	8.2	2.33	1.75	0.31	299.22	2.28	386	118	4.05	0.4	1.29	2.94	4.64	0.9	22	349	5.42	1.15	1.14	7.08	6.73	2.91	0.94	4.9	16.3	26.7	0.95	0.95	11.1	2	2	2	2	13	3
0	1	82	57.9	0.7	15.68	3.88	1.12	1.81	83.12	4.71	128	118	4.05	0.85	1.54	7.26	4.64	0.9	16.12	318	3.33	2.1	1.84	6.27	6.1	1.1	0.33	3.78	18.7	25.8	0.87	0.89	12	1	2	1	1	13	1
0	1	57	53.1	0.96	9.05	3.02	3.16	0.4364	125.093	2.5833	206.46	140.86	4.5301	0.5101	1.672	4.474	6.8902	5.915	27.34	346.06	0.15	1.1	9.12	5.4	8.9319	0.27	0.2	2.27	19.5	27.9	0.93	0.93	10.9	1	2	1	1	1	3
1	1	46	40.5	0.87	6.73	2.06	1.03	0.36	298.67	4.91	224	76	2.66	0.27	0.75	3.68	4.83	0.5	32.13	91	1.34	0.8	1.71	2.92	11.93	3.5	0.89	1.07	17.8	33.5	0.94	0.94	11	2	2	1	1	34	5
0	1	46	70.4444	1.0953	8.6243	2.7955	2.54023	0.19	109.61	1.65	251	153	5.17	0.43	2.29	3.78	6.74	3.1	11.65	271.72	2.4651	1.327	1.394	4.3969	7.6498	1.87	0.21	2.31	17.3	27.2	0.87	0.87	10.2	2	2	1	2	2	5
1	0	66	54.3	0.94	7.15	2.36	1.21	0.92	395.16	9.18	245	154	4.98	0.57	0.62	5.69	6.93	3	11	361.51	0.95	1.37	5.81	4.96	7.3465	1.34	0.39	2.68	17.2	26.1	0.91	0.91	10.7	2	2	2	1	3	1
0	0	76	77.3	0.88	9.8	2.64	2.04	0.2	191.75	6.15	186	115	3.59	0.19	0.97	5.97	7.14	0.4	19.06	332	2.83	2.2	1.26	5.6	7.13	5.51	1.89	2.13	17.8	27.5	0.99	0.99	11.6	1	1	2	1	5	2
0	0	55	8.24	5.17	12.89	5.11	1.72	0.29	108.99	3.01	206	131	4.52	0.54	1.89	5.68	8.24	0.9	8	167	2.91	1.04	0.81	4.32	5.3	0.8	0.22	3.23	17.2	30.6	0.88	0.88	10.3	2	2	2	1	3	3
0	1	82	67.2	1.17	9.03	3.27	4.67	0.18	104.41	3.22	237	122	4.02	0.41	2.27	7.3	10.02	0.5	12.2	272.83	2.4408	1.3702	1.5511	4.7075	7.3409	6	1.93	3.56	17.4	23.9	0.81	0.81	9.5	1	2	2	2	3	5
0	0	86	70.4272	1.0748	8.6554	2.75	3.32539	6.06	78.99	1.32	297	135	4.12	0.62	3.76	4.96	4.71	3.2	15	265	2.54	1.19	1.05	4.63	16.88	5.3	0.23	4.23	72.8	24.6	1.04	0.95	10.4	1	2	1	2	10	1

## Sheet: Testingset data
Target	SEX	AGE	T4	T3	FT4	FT3	TSH	MLR	PLR	NLR	PLT	HGB	RBC	MON	LYM	NEU	WBC	CRP	HCY	UA	LDLC	HDLC	TG	CHOL	GLU	FDP	DDIMER	FBG	TT	APTT	INR	PTR	PT	CHD	AF	T2MD	HBP	NIHSS	TOAST
0	1	71	67.9053	1.0973	8.325	2.8178	3.42863	7.88	75	1.54	189	129	4.28	0.32	2.52	3.89	6.58	4.8	12	211	3.79	1.34	1.74	5.95	6.76	1.27	0.6	2.97	17.1	25.2	1.08	0.91	10.7	2	1	1	2	9	5
0	0	50	78.8	0.98	10.1	2.74	1.88	0.25	64.64	1.23	117	126	4.2	0.45	1.81	2.22	4.51	1.1	17.71	377	2.2	1.03	1.62	3.87	3.45	1.16	0.38	2.91	18.2	24.7	1.07	1.07	12.5	2	2	2	2	7	5
0	1	52	67	0.89	8.91	2.35	0.999	0.14	87.62	1.46	184	153	4.99	0.3	2.1	3.06	5.64	2.272	12	286	3.03	1.5	3.23	6	15.05	1.07	0.1	3.29	16.7	26.9	0.96	0.97	11.3	1	2	1	1	6	3
0	1	76	65.5	1.2	8.28	3.21	2.2	2.42	189.66	15.16	110	152	5.04	0.24	0.58	8.79	7.62	0.9	13.5	265.99	2.3756	1.4812	1.2928	5.099	8.9341	0.8	0.2	3.41	18.8	27.8	0.96	0.97	11.6	2	1	1	2	2	1
0	1	72	58.4	0.89	8.46	2.86	5.01	0.34	157.52	2.85	178	118	3.85	0.38	1.13	3.22	4.83	2.1	18.2	342	1.58	1.5	0.7	3.4	8.26	1.6	0.68	2.4	15.8	27	1.02	1.02	11.9	2	2	2	1	7	1
0	0	79	62.7	0.82	16.31	4.33	1.89	0.24	152.67	3.63	200	138	4.34	0.31	1.31	4.75	6.53	1.3	14	298	3	1.11	2.51	5.25	5.9	2.55	0.84	3.13	17.3	29.5	0.96	0.97	11.3	1	2	2	2	16	1
0	0	76	73.1	0.93	8.04	2.65	2.45	0.31	125.38	2.29	163	150	4.98	0.4	1.3	2.98	4.91	1.6	23	350	1.84	0.99	1.09	3.65	4.18	0.3	0.28	1.91	17.3	30.6	1.11	1.11	13	2	2	2	1	3	5
0	1	64	83.02	1.2	9.04	3.07	0.913	0.26	108.72	2.98	162	153	4.99	0.39	1.49	4.44	6.67	1.5	17	407	2.37	0.83	1.69	3.97	4.43	2.19	0.47	2.86	17.9	29.8	0.92	0.92	10.8	2	2	2	1	16	1
0	0	92	70.5	0.77	8.55	2.43	2.49	0.71	340.58	7.81	235	118	3.81	0.49	0.69	5.39	6.6	40.5	15.84	273	3.8	1.3	1.09	5.6	6.14	8.31	2.7	6.14	14.5	27.6	1.05	1.05	12.3	1	1	2	1	3	2
1	1	78	67.0788	1.0421	8.465	2.6923	3.16343	2.89	230.86	9.38	187	107	3.67	0.28	0.81	7.6	6.33	9.5	22	349	5.42	1.15	1.14	7.08	6.73	6	0.94	4.73	17.9	28.6	0.95	0.94	11.2	2	2	2	2	10	3
0	0	59	83.02	1.2	9.04	3.07	0.913	0.22	165.96	3.21	234	136	4.4	0.31	1.41	4.52	6.33	1.475	12	260	2.19	0.93	1.85	3.96	6.55	2.94	0.77	3.45	16.8	28.3	0.97	0.97	11.4	2	2	2	1	5	5
0	1	91	65.9	0.79	8.6	2.19	1.49	0.37	148.8	1.94	186	127	4.14	0.46	1.25	2.43	4.38	2.476	22.51	377	2.4128	1.3979	1.696	5.3767	9.61	3.74	1.27	1.88	19.1	22.9	0.94	0.94	11	1	2	1	1	3	5
0	0	78	65.1326	1.069	8.0768	2.6149	3.61964	0.27	92.67	1.98	177	107	3.67	0.51	1.91	3.78	6.33	9.5	23.28	488	1.24	1.2	1.65	3.19	4.36	2.6	0.75	4.72	15.4	25.7	0.89	0.89	10.4	1	2	1	1	5	3
0	0	74	71.3	0.93	9.34	2.86	2.96	0.35	158.52	3.12	279	125	4.31	0.61	1.76	5.49	8.01	0.5	17.47	390	4.34	1.5	3.88	7.6	12.85	1.3056	0.408	2.9033	17.301	26.577	0.95	0.9502	11.096	2	2	1	1	6	1
1	0	71	69.2833	1.0219	8.8625	2.8385	3.74311	0.29	170.54	2.67	191	132	4.37	0.33	1.12	2.99	4.51	0.5	18	188	2.02	1.49	0.89	3.91	5.37	1.13	0.19	2.34	17.3	26.4	0.93	0.93	10.9	2	2	2	2	15	5
1	1	53	55.1	0.88	7.72	2.58	1.9	2.86	128.46	7.56	158	136	4.85	0.43	1.23	9.3	6.17	3.3	66	600	0.91	0.49	5.37	3.84	5.07	1.07	0.3	3.49	18.8	27.5	0.93	0.92	10.9	2	1	2	2	3	1
0	1	84	69.0318	1.0555	8.6546	2.7037	2.70105	0.59	281.71	7.8	231	140	4.37	0.48	0.82	6.4	7.92	10.5	10	216	3.08	1.65	0.93	5.15	5.33	3.39	0.81	4.3	16.5	28.6	0.92	0.92	10.8	1	2	2	1	7	3
0	1	54	82.11	1.17	8.52	2.82	1.95	0.15	77.05	1.38	225	152	5.04	0.45	2.92	4.03	7.62	0.9	12	211	3.79	1.34	1.74	5.95	6.76	1.53	0.6	2.4	16.8	28.9	0.9	0.91	10.6	2	2	1	1	1	3
1	1	51	72.2298	1.0432	8.9697	2.803	2.79681	0.36	107.26	4.42	133	163	5.09	0.45	1.24	5.48	7.36	1.4	38	482	2.1	1.29	2.47	4.51	5.56	0.53	0.18	1.55	17.6	28.7	0.92	0.92	10.8	2	2	2	1	6	5
1	0	82	52.4	0.88	7.44	2.78	2.71	0.31	209.89	4.16	191	116	3.58	0.28	0.91	3.79	5.16	0.4	56	230	2.13	1.04	1.5	3.83	5	0.53	0.32	2.48	15.8	31.3	1.03	1.03	12	2	2	2	2	8	1
0	1	52	68.7	1.29	8.59	3.13	0.89	0.23	80.83	1.49	215	144	4.51	0.61	2.66	3.97	7.35	0.4	12	268	4.06	1.38	1.82	6.28	5.11	0.27	0.19	2.44	16.9	28.6	0.89	0.9	10.5	2	2	2	2	4	3
1	1	68	88.7	1.19	9.88	3.06	3.59	0.28	255.83	3.5	307	131	4.61	0.33	1.2	4.2	5.9	0.4	13	261	4.8	1	0.92	6.22	4.43	2.94	0.99	3.71	16.6	31	0.99	0.99	11.6	2	2	2	2	2	5
0	0	71	57.1	0.89	7.33	2.57	2.74	0.19	120.9	2.73	324	133	4.73	0.52	2.68	7.32	10.65	2.8	14.56	302.87	2.6671	1.3537	1.4986	4.8969	10.8602	1.7952	0.4589	3.0051	17.624	26.499	0.9398	0.9449	11.037	1	2	1	1	1	3
0	0	77	63.9	1.12	7.73	2.32	3.3	0.22	143.11	1.39	322	120	4.18	0.5	2.25	3.13	6.07	3.7	7	188	2.6	1.23	2.35	4.98	4.39	2.67	1	2.48	16.6	27.8	0.98	0.98	11.5	2	2	1	2	6	1
0	0	85	59.5	0.89	9.45	2.69	1.74	0.34	189.06	2.59	242	115	3.72	0.44	1.28	3.31	5.13	3.176	14	239	2.58	1.24	0.98	4.27	4.2	3.81	1.02	3.67	17.5	25.8	0.97	0.97	11.4	2	2	2	1	4	5
0	1	65	65.9801	1.0512	8.118	2.7705	3.76381	5.16	81.12	1.42	159	146	5.49	0.38	1.96	2.78	6.97	0.5	12.99	197	2.1	1.7	1.81	4.62	6.09	1.87	1.14	3.54	17.1	30.4	1.08	0.87	11	1	1	1	2	4	5
0	1	91	73.2563	1.0861	9.3874	2.9749	3.90433	0.37	77.54	2.25	107	120	3.94	0.51	1.38	3.1	5.13	4.6	23.03	137	0.59	1.9	0.69	2.8	5.48	3.48	0.92	2.13	17.7	32.7	1.02	1.02	11.9	1	1	2	2	5	3
0	1	55	40.2	0.71	7.96	2.68	3.16	4.48	115.81	5.3	249	128	5.36	0.48	2.15	11.4	5.38	0.4	12	233	3.21	0.93	1.28	4.72	4.55	0.8	0.19	4.23	18	24.4	1.09	1.08	10	2	1	1	2	22	5
0	1	75	69.3289	1.0328	8.7057	2.7846	2.945	0.26	151.76	2.74	258	123	4.07	0.44	1.7	4.66	7.18	2.7	8	250	2.53	0.94	0.88	3.84	6.62	1.87	0.28	2.2	17.6	30.6	0.93	0.93	10.9	2	2	1	1	9	5
1	1	61	71.7638	1.1181	9.1042	2.6923	8.68112	0.24	97.96	2.24	192	146	5.49	0.48	1.96	4.39	6.97	0.5	7	290	2.95	1.12	1.35	5.14	4.24	14.11	9.25	1.63	17	22.8	0.88	0.88	10.3	2	2	2	1	13	1
0	1	65	66.6495	1.0671	8.2294	2.7628	3.33283	3	158.33	2.26	228	122	4.18	0.48	1.44	3.26	4.15	0.5	13.88	216	3.01	1.3	1.51	5	7.12	0.8	2.57	2.61	15.5	25.9	0.96	0.9	11.2	2	1	1	2	6	3
0	0	60	70.339	1.0792	8.5607	2.6865	2.69398	0.23	126.55	2.8	224	136	4.87	0.4	1.77	4.96	7.22	2.5	13.48	280.54	2.4629	1.3169	1.4178	4.3432	6.732	1.1	0.3	3.23	17.5	35.6	0.87	0.87	10.2	2	2	1	1	4	1
0	0	76	68.1323	1.0574	8.492	2.706	3.08624	2.85	137.09	3.75	207	153	4.66	0.53	1.51	5.67	8.05	5	23.35	297	0.77	1.4	2.04	3.1	6.47	0.53	0.27	4.11	16.5	26.7	1.04	0.95	11.9	2	2	1	2	35	3
0	1	63	68.0431	1.1042	8.5707	2.853	2.91776	0.27	88.54	2.13	170	141	4.42	0.51	1.92	4.08	6.62	1	10	361	1.44	1.39	1.98	3.73	5.38	1.32	0.2	2.3	17.1	25.5	0.86	0.86	10.1	2	2	2	1	5	3
0	0	70	4.52	6.33	15.92	4.23	2.93	0.18	77.97	1.37	223	129	4.22	0.52	2.86	3.93	7.42	0.5	12.99	279.63	2.4125	1.3698	1.6153	5.0061	7.6848	2.26	0.53	2.47	17.6	26.4	0.9	0.91	10.6	2	2	1	2	5	4
0	1	87	84.4	1.05	18.69	4.32	2.59	0.26	130.37	3.03	176	124	4.4	0.35	1.35	4.09	5.87	1	13	303	2.5	1	1.12	4.01	4.57	2.01	0.49	4.41	17.6	27.7	0.97	0.97	11.4	2	2	2	1	2	1
0	1	56	66.5	0.4	8.3	2.2	1.81	3.63	115.38	5.6	180	136	4.33	0.43	1.56	8.74	4.51	0.5	11	331	2.71	1.06	1.63	4.38	5.55	2.7818	0.24	2.66	17.3	31.9	0.95	0.961	10.7	2	1	2	1	4	3
0	1	49	82.4	1.17	8.58	2.59	2.23	0.2	126.71	2.06	204	164	5.1	0.32	1.61	3.31	5.52	2.5	11	241	2.76	1.22	1.19	4.52	4.75	0.56	0.19	2.59	17.1	26	0.89	0.89	10.4	2	2	2	1	0	5
0	0	75	60.9	0.77	6.79	2.14	1.63	0.04	217.54	0.32	248	120	4.33	0.05	1.14	0.37	1.61	51.1	20.41	336	2.94	1.2	2.78	5.4	8.08	5.73	1.31	3.62	17.4	28.7	1	1	11.7	1	2	2	1	8	4
0	1	64	5.28	1	12.91	5.35	2.92	0.21	144.52	2.29	224	150	4.89	0.32	1.55	3.55	5.5	6.9	12.12	245	2.4236	1.323	1.4703	4.4388	8.1061	1.3152	0.3794	3.0189	17.419	26.346	0.9505	0.9496	11.113	2	2	1	1	1	5
0	0	76	76	1.27	9.31	3.44	0.66	0.57	146.46	3.81	186	143	4.36	0.73	1.27	4.84	6.91	0.4	12.91	303	1.92	2	1.05	4.4	6.6	0.53	0.19	3.15	18	28.3	0.95	0.95	11.1	2	2	2	1	4	5
0	1	68	54.3	0.94	7.15	2.36	1.21	0.22	94.7	2.69	125	155	5.05	0.29	1.32	3.55	5.33	2.2	19.89	316.71	2.35	1.2	2.1	4.5	8.8489	1.07	0.24	3.9	16.2	24.2	0.97	0.97	11.4	1	2	1	1	0	1
0	0	68	65.2793	1.0702	8.1165	2.6428	3.38591	0.19	136.07	1.6	249	119	3.68	0.34	1.83	2.92	5.26	1.2	12	291	1.4	1.06	1.51	3.32	4.59	0.66	0.3	3.22	17.1	26.7	1.04	1.03	12.1	2	2	2	1	13	5
0	1	82	67.1	1.48	8.05	3.4	4.73	0.22	114.93	2.02	231	114	3.92	0.45	2.01	4.07	6.83	0.5	26	455	4.84	1.78	6.4	8.71	3.38	1.34	0.64	1.97	18.9	30.8	1	1	11.7	2	2	1	1	3	5
0	1	73	8.44	4.96	16.72	4.52	1.77	0.19	154.84	2.65	192	120	4.02	0.24	1.24	3.29	4.83	0.5	16.08	320	2.37	0.75	1.24	3.69	4.53	0.94	0.24	2.67	17.5	27.8	0.95	0.95	11.1	1	2	2	2	4	5
1	1	63	68.2071	1.0542	8.4279	2.8249	2.98646	1.49	227.87	4.7	139	122	4.02	0.41	0.61	2.87	10.02	0.5	10	220	4.92	1.64	0.64	6.85	5.31	1.88	0.24	3.15	18.1	25.9	0.95	0.92	10.4	2	1	1	2	4	1
0	1	77	53.1	0.86	7.1	2.41	5.84	0.3	159.79	4.08	155	121	4.15	0.29	0.97	3.96	5.3	2.1	22	130	1.27	1.27	0.67	2.84	10.77	0.54	0.18	2.13	17.6	26.4	1	1	11.7	1	2	1	1	1	1
0	1	46	67.2691	1.0652	8.3759	2.7551	3.1831	4.22	123.68	1.64	235	136	4.05	0.45	1.9	3.12	3.85	4.4	11.46	264.71	2.4654	1.3278	1.4507	4.3488	6.4391	0.94	0.21	3.22	16.5	29.1	0.89	0.91	13.8	2	1	1	2	3	5
0	0	86	71.6122	1.0527	8.7811	2.8113	2.92142	0.23	101.48	2.7	137	147	5.17	0.31	1.35	3.64	5.79	1.6	12	295	2.71	1.72	1.13	4.95	5.17	1.69	0.38	2.86	17.1	27.8	0.9	0.91	10.6	2	1	2	1	5	5
0	0	51	62.8	1.3	7.41	3.11	7.89	5.02	128.81	1.97	304	158	5.25	0.47	2.36	4.66	4.78	0.5	13.76	229	3.44	1.6	3.71	6.94	9.29	1.87	0.27	2.71	19.2	27.782	1.02	0.93	11.1	2	1	1	1	2	3
0	0	90	6.49	3.31	14.7	3.7	2.56	0.32	111.97	3.51	159	105	3.39	0.45	1.42	4.99	6.96	1.3	13.2	197	2.1	1.7	1.81	4.62	6.09	2.6	1.14	2.69	16.8	25.9	0.88	0.88	10.3	1	2	2	1	3	5
0	1	69	82.9	1.11	9.21	2.72	2.56	0.28	104.74	1.85	199	141	4.88	0.53	1.9	3.51	6.11	0.5	17	294	3.94	0.82	2.3	5.81	17.05	0.8	0.39	3.08	17.3	28.5	0.94	0.94	11	2	2	1	2	2	3
1	1	46	65.3464	1.0716	8.4797	2.6949	2.98166	0.24	112.62	1.92	232	144	4.79	0.49	2.06	3.96	6.96	0.5	42	285	3.19	1	2.17	5.17	6.93	0.38	0.19	2.07	16.8	25	0.84	0.85	9.9	2	2	1	1	17	1
0	0	77	7.22	1.16	14.8916	4.38	5.59	0.16	97.92	0.9	188	124	4.02	0.31	1.92	1.72	4	2.617	8	655	1.06	1.5	1.37	3.18	8.58	1.6	0.42	2.48	17.8	24.8	1.03	1.03	12	1	2	1	1	2	5
0	1	68	71.5086	1.043	8.8051	2.7467	3.15123	0.25	126.05	2.91	150	133	4.15	0.3	1.19	3.46	4.99	1.1	17.41	404	2.84	1.1	1.4	4.58	7.69	1.7	0.54	2.11	18.9	26.4	0.84	0.84	9.8	2	2	2	1	4	3
0	0	59	71.55	1.26	17.91	4.25	0.17	0.25	235.88	5.29	309	137	4.7	0.33	1.31	6.93	8.64	0.5	12.89	185	2.78	1.7	1.64	5.23	10.57	0.9	0.33	2.41	18.6	22.2	0.83	0.84	9.8	1	2	2	2	4	1
0	1	79	47.8	0.89	7.38	2.45	1.36	0.21	80.86	2.36	169	120	3.97	0.43	2.09	4.93	7.58	2	16	293.71	1.9	0.99	1.12	3.4	6.72	0.53	0.22	2.09	17.1	27.2	1.09	1.09	12.7	2	2	1	1	2	5
0	0	95	53.1	0.96	9.05	3.02	3.16	0.49	144.83	3.28	168	124	3.65	0.57	1.16	3.8	6.03	4.8	15.07	375	1.67	1.3	1.67	3	7.82	0.8	0.31	2.9	16.9	28.3	1.11	1.1	12.9	1	2	2	1	5	4
0	0	64	74.9	1.08	8.59	2.89	4.86	0.16	151.69	3.38	179	122	4.26	0.19	1.18	3.99	5.42	15.6	6	214	3.62	1.08	0.65	4.99	7.03	0.27	0.19	3.08	17	25.8	0.96	0.97	11.3	2	2	1	1	6	3
1	1	54	68.7636	1.0861	8.6619	2.6698	3.36214	0.26	131.72	3.02	245	153	4.66	0.49	1.86	5.61	8.05	5	15.08	260	4.36	1.6	1.62	6.7	17.6	1.87	0.26	3.71	16.3	29.2	0.95	0.95	11.1	2	2	2	1	14	3
1	1	52	96.8	0.97	11.19	2.59	11	5.5	92.42	2.76	183	157	5.13	0.36	1.98	5.47	7.17	0.5	21.89	403	2.16	0.93	1.06	3.57	5.63	1.87	0.22	3.58	17.6	27.9	1.17	0.9	11	1	1	2	2	3	1
1	0	87	79.8	1.13	8.37	2.88	6.39	0.19	62.76	2.14	91	108	3.64	0.28	1.45	3.11	5.04	0.3	31	591	1.33	0.94	0.97	2.78	5.33	6.16	1.36	1.97	19.7	28.7	1.04	1.03	12.1	1	1	1	1	1	5
1	1	82	87.11	1.14	9.11	2.67	1.5	0.31	220	7.53	187	146	4.92	0.26	0.85	6.4	7.79	3.829	20	240	4.31	1.15	1.62	6.2	12.44	8.53	2.18	3.08	16.9	27.3	0.94	0.94	11	2	2	1	2	3	1
0	1	77	55.1	0.88	7.72	2.58	1.9	0.19	145.33	1.39	218	116	3.82	0.28	1.5	2.09	4.01	0.5	7	294	3.06	1.05	1.9	4.97	5.33	2.67	0.67	2.58	16.8	24.7	0.96	0.97	11.3	2	2	2	1	3	5
1	1	89	89.6	0.79	9.49	2.03	2.41	0.37	124.44	3.98	112	94	3.08	0.33	0.9	3.58	4.99	40.1	17.88	51	2.3956	1.4577	1.2415	5.1375	5.61	2.7568	0.6613	4.2574	17.907	27.487	0.9511	0.9357	11.03	1	2	2	1	7	5
0	1	70	71.4838	1.1033	8.754	3.0144	2.43563	0.33	101.1	2.47	183	152	4.79	0.59	1.81	4.47	7	1.41	10	255	2.28	1.31	1.19	4.13	6.15	1.1	0.34	2.96	17.7	27.2	0.94	0.94	11	2	2	1	1	14	5
0	0	73	47.8	0.89	7.38	2.45	1.36	4.8	70.51	1.29	220	141	4.41	0.65	3.12	4.04	5.13	0.5	14.34	303.21	3.51	1.3	1.73	5.6	5.8009	1.6	0.18	3.57	16.6	29.7	0.92	1.04	1.2	2	1	1	1	4	3
0	1	91	46.4	0.82	7.11	2.39	3.57	0.37	148.8	1.94	186	127	4.14	0.46	1.25	2.43	4.38	2.383	21.22	377	2.4488	1.4106	1.7864	4.9779	9.61	3.74	1.27	1.88	19.1	22.9	0.94	0.94	11	1	2	1	1	3	5
0	1	54	89.6	0.79	9.49	2.03	2.41	4.03	143.95	2.32	226	161	5.55	0.39	1.57	3.64	6.64	1.5	28.71	362.72	2.35	1.2	2.1	4.5	6.0996	0.8	0.24	3.71	17.6	27.9	1.08	0.93	9.8	1	1	2	1	1	2
0	0	69	68.4063	1.0734	8.3973	2.7082	3.27101	5.05	66.18	1.69	137	132	4.4	0.41	2.07	3.49	4.96	2.683	16.39	325	2.8	1.16	1.07	4.45	4.05	1.07	0.63	3.67	16.3	28.9	0.88	0.86	12.2	2	1	1	2	5	5
0	0	81	84.1	0.9	9.18	2.36	2.13	0.36	84.02	2.11	163	148	4.82	0.7	1.94	4.1	6.94	2.373	16.79	296.85	1.98	1.1	0.92	3.5	4.9014	0.8	0.42	3.45	18.2	26.8	1.04	1.03	12.1	2	2	2	1	4	1
1	1	64	69.6611	1.0983	8.6452	2.8532	3.65748	1.53	93.28	1.4	250	129	4.25	4.1	2.68	3.74	6.95	27.213	8	138	5.06	1.62	1.02	7.14	4.68	1.07	0.44	2.09	17.8	26.7	0.92	0.92	10.8	2	2	2	1	4	5
0	0	74	61.1	0.8	8.2662	2.13	3.07	0.35	158.52	3.12	279	125	4.31	0.61	1.76	5.49	8.01	0.5	17.95	390	4.34	1.5	3.88	7.6	12.85	1.5972	0.4293	2.8612	17.859	26.409	0.95	0.9506	11.081	2	2	1	1	4	1
0	1	73	77.1	1.1	9.07	2.73	2.74	4	175	5.49	196	140	4.51	0.28	1.12	6.15	5.33	5.7	12	286	3.03	1.5	3.23	6	15.05	4.01	0.1	3.37	17.8	29.1	1.03	1.16	11.7	1	1	2	2	13	3
0	1	63	81.5	1.12	8.98	2.4	2.7	0.13	95.15	1.63	216	130	4.19	0.29	2.27	3.69	6.38	1.628	22	275	1.52	0.84	1.95	3.25	5	1.87	0.44	3.22	16.9	28.1	1	1	11.7	1	2	1	1	8	5
1	1	89	59.6446	0.994	7.9633	2.7266	3.2635	0.37	124.44	3.98	112	94	3.08	0.33	0.9	3.58	4.99	40.1	16.18	51	2.3966	1.4601	1.238	5.1385	5.61	2.5274	0.4884	4.2226	18.052	27.213	0.9432	0.9339	11.05	1	2	2	1	7	5
0	1	59	71	1.05	6.84	2.53	0.948	0.16	131.02	2.11	283	122	4.27	0.35	2.16	4.55	7.16	2.9	9	274	2.73	1.12	3.02	5.22	4.25	1.07	0.29	2.53	17.2	27.6	0.94	0.94	11	2	2	2	1	4	5
1	0	77	58.1	1.11	8.0565	2.7185	6.4	3.62	186.67	5	196	104	3.57	0.29	1.05	5.25	6.11	0.7	12	206	1.7	0.9	3.25	3.79	4.75	0.66	0.19	3.67	17.5	26.4	0.93	1.03	10.5	1	1	1	2	15	1
0	1	80	64.6	0.53	7.4	2.28	5.8	0.18	57.14	1.59	180	137	4.44	0.57	3.15	5	8.83	1.5	16	360	0.82	1.02	1.07	2.46	4.7	3.74	0.74	3.45	17.6	29.8	1.12	1.12	13.1	1	2	1	1	1	5
0	1	58	70.0442	1.0209	8.9149	2.7672	3.59835	3.82	146.51	3.97	252	136	4.54	0.45	1.72	6.82	4.9	0.9	20.24	460	1.33	1.5	0.57	3.09	5.28	1.69	1.19	4.46	17.7	25	0.9497	0.91	11	2	1	1	2	4	3
1	0	82	81.5	0.83	8.7	2.26	2.82	0.37	72.2	3.17	187	147	5.02	0.97	2.59	8.2	11.86	13.8	16	285	1.91	1.15	1.39	3.69	5.64	4.01	1.62	5.39	47.1	28.9	1.17	1.16	13.6	1	1	2	1	11	2
0	1	85	71.3	1.09	8.32	3.26	1.5	0.7	535.09	6.3	305	136	4.52	0.4	0.57	3.59	4.71	2.1	13	262	2.93	1.05	1.12	4.49	6.1	1.51	0.41	2.76	17	27.4	0.95	0.95	11.1	2	2	1	2	4	1
0	1	58	48.4	0.94	9.14	2.79	2.6	0.17	83.11	1.89	187	150	4.7	0.39	2.25	4.25	6.99	2	30.8	418	0.85	1.4	6.49	5.2	7.12	0.53	0.29	2.09	18.5	26.4	0.98	0.98	11.5	2	2	1	1	7	5
0	1	58	85.9	1.42	9.86	3.65	2.06	1.43	197.27	10.64	217	144	4.81	0.77	1.1	11.7	5.35	6.566	13	261	4.8	1	0.92	6.22	4.43	0.8	0.99	2.76	15.3	24.8	0.89	0.92	11	2	1	1	2	5	3
0	0	56	72.6343	1.0316	8.8113	2.7281	2.97834	1.46	135.71	10.53	133	164	5.1	0.67	0.98	10.32	5.52	2.5	13	154	2.22	1.12	1.24	3.9	5.1	2.73	1.61	6.72	15.4	26.9	0.9	0.87	11.1	1	1	1	2	18	1
0	0	71	65.2735	1.057	8.0362	2.724	2.67836	0.48	217.24	6.3	252	133	4.46	0.56	1.16	7.31	9.06	7.4	13.43	262	4.13	1.2	1.52	6.02	7.01	1.5	0.48	4.15	17.7	26.2	0.95	0.95	11.1	2	2	1	2	5	5
0	1	79	69.9832	1.0397	8.7799	2.7452	2.71778	1.59	213.85	4.22	278	131	4.39	0.82	1.3	5.49	7.51	5.4	16.77	383	2.07	1.24	0.49	3.53	4.64	1.8122	0.45	3.85	15.8	24.4	0.88	0.8993	11.7	2	1	2	2	3	5
1	0	68	7.41	6.33	15.03	5.18	0.64	0.36	410.45	13.12	275	136	4.35	0.24	0.67	8.79	9.73	1.4	14	183	4.04	1.35	0.61	5.67	8.18	2.82	0.64	2.72	17	24.6	0.9	0.91	10.6	1	1	2	1	8	5
0	1	51	70.6	1.3	8.74	3.17	3.21	0.23	106.55	1.58	293	157	5.16	0.63	2.75	4.34	8.04	2.942	11	378	3.01	1.09	4.66	6.22	5.16	1.07	0.33	3.37	16.3	27.4	0.88	0.88	10.3	2	2	2	1	6	1
0	1	46	82.4	1.17	8.62	2.73	1.99	0.19	109.61	1.65	251	153	5.17	0.43	2.29	3.78	6.74	3.1	11.49	290.16	2.4497	1.3275	1.5418	4.3791	7.4896	1.87	0.21	2.31	17.3	27.2	0.87	0.87	10.2	2	2	1	2	5	4
0	0	69	55.1	0.88	7.72	2.58	1.9	0.2	98.27	1.86	227	139	4.41	0.47	2.31	4.3	7.21	0.6	18	271	2.18	0.88	0.72	3.39	4.3	1.13	0.19	2.55	18.8	28.9	1.02	1.02	11.9	1	2	2	1	7	3
0	1	58	67.421	1.014	8.3526	2.6567	2.57023	0.35	109.45	3.87	139	116	4.04	0.44	1.27	4.92	6.82	2	10	198	2.61	0.7	1.19	3.85	6.13	1.13	0.19	4.1	17.4	27.8	1.05	1.05	12.3	1	2	1	1	10	5
1	1	82	69.8	0.87	8.77	2.31	1.49	0.67	224.1	10.14	186	143	4.78	0.56	0.83	8.42	9.85	27.4	13.69	205	2.28	1.8	0.93	4.5	12.69	5.3	1.15	4.23	16.7	26.5	1.03	1.03	12	2	1	1	1	7	5
0	1	46	69.43	1.0539	8.6756	2.7094	2.5887	0.3	171.64	4.03	230	157	5.13	0.4	1.34	5.4	7.17	0.5	14.5	289.51	1.13	1.9	1.03	3.5	6.6236	1.6	0.61	3.37	17.7	22.1	1.02	1.02	11.9	2	2	2	2	6	5
0	1	59	133.8	0.82	25.44	4.88	0.56	0.27	85.47	3.33	147	131	4.51	0.46	1.72	5.73	8.04	0.9	14	343	1.16	0.65	2.62	2.49	6.19	0.8	0.36	2.9	18.4	32.6	1.18	1.17	13.7	2	2	1	1	12	1
0	1	49	6.83	5.09	14.64	4.06	1.44	0.2	126.71	2.06	204	164	5.1	0.32	1.61	3.31	5.52	2.5	11	241	2.76	1.22	1.19	4.52	4.75	0.56	0.19	2.59	17.1	26	0.89	0.89	10.4	2	2	2	1	3	5
0	1	65	50.1	0.97	7.69	3.03	2.44	0.26	179.82	2.24	196	132	4.19	0.28	1.09	2.44	3.94	3.2	14.4	273	1.97	1.8	0.94	4.2	9.26	1.36	0.19	2.16	17.8	28.3	0.96	0.97	11.3	2	2	1	2	2	3
0	0	56	71.3	1.09	8.32	3.26	1.5	0.18	104.76	2.23	220	152	5.27	0.38	2.1	4.68	7.43	1.5	11.74	276.28	3.51	1.3	1.73	5.6	5.437	0.8	0.18	2.27	17.8	24.6	0.89	0.89	10.4	2	2	2	1	4	3
0	0	75	58.8	0.9	8.28	2.44	2.38	0.3	153.57	3.27	172	126	4.3	0.34	1.12	3.66	5.35	1.2	13	365	2.39	1.83	1.26	5.13	5.43	2.34	0.95	2.53	16.2	30.6	1.01	1.01	11.8	2	2	2	1	6	3
0	0	59	62.05	0.82	19.87	4.21	1.538	0.16	92.56	2.21	224	138	4.67	0.38	2.42	5.36	8.35	3.7	9	395	2.74	0.83	3.19	5.02	10.81	2.73	0.44	3.07	18.1	25.9	0.87	0.87	10.2	2	2	1	1	1	1
0	1	75	67.4671	1.0421	7.7606	2.8172	2.70162	0.41	186.72	4.08	239	138	4.58	0.52	1.28	5.22	7.03	8.9	16.43	232	0.95	1.4	1.22	2.9	1.33	5.08	0.26	2.44	17.1	32	0.97	0.97	11.4	2	2	1	1	1	5
1	0	63	71.6262	1.0426	9.081	2.6867	3.47319	10.09	109.01	1.92	121	133	4.46	0.11	1.11	2.13	9.06	7.4	13	475	2.02	1.3	1.23	3.87	6.11	1.13	0.82	6.11	17.4	26.7	0.89	0.93	11.2	1	2	1	2	15	3
0	1	57	58.5	0.99	7.51	2.56	0.304	0.23	115.87	1.94	219	135	4.32	0.44	1.89	3.67	6.12	3.1	26	431	2.34	0.98	1.62	4.14	5.23	0.53	0.2	2.37	17.1	29.6	0.96	0.97	11.3	2	2	2	1	2	4
0	1	55	43.26	0.55	10.14	3.48	63.95	2.11	158.75	5.43	254	130	4.35	0.76	1.6	8.69	5.8	1.8	18	252	3.12	1.03	2.04	5.08	7.48	5.58	0.33	3.91	17.5	23.8	1.03	0.92	9.6	2	1	2	2	5	5
1	1	74	62.1315	0.9979	7.1482	2.7565	3.50667	0.9	330.61	22.55	162	121	3.77	0.44	0.49	11.05	11.98	83.5	15.81	232	2.17	1.6	0.51	4	2.37	1.34	0.25	6.14	16.1	28.1	1.11	1.1	12.9	2	2	1	1	10	5
0	1	71	68.2	1.17	8.1	3.23	2.03	0.25	94.84	2.55	239	157	5.12	0.64	2.52	6.42	9.64	2.496	13	278	3.11	1.45	1.28	5.14	5.76	3.74	0.32	2.44	19.6	33.2	1.08	1.08	12.6	1	1	2	1	7	2
1	0	67	83.4	0.72	10.2	1.32	26.6	0.25	151.2	4.54	316	136	4.76	0.52	2.09	9.48	12.16	4.2	19.27	473	2.6427	1.3461	1.6063	5.7271	11.8378	4.28	0.67	3.62	17.3	23.4	0.93	0.93	10.9	2	2	1	1	11	1
1	0	56	50.17	0.78	16.03	4.48	1.006	0.12	116.36	1.14	320	135	4.61	0.33	2.75	3.13	6.33	1.5	9	149	4.55	1.5	2.73	7.28	9.15	16.63	7.06	1.13	19.7	19.8	0.81	0.81	9.5	2	2	1	2	0	5
0	0	76	71	0.87	9.11	2.37	5.14	0.23	66.51	1.87	141	141	4.78	0.49	2.12	3.97	6.66	0.5	11.7	248	4.11	1.6	1.52	6.4	7.71	2.41	0.46	2.13	72.8	24.7	0.92	0.92	10.8	2	2	2	2	10	3
1	1	56	68.2	1.17	8.1	3.23	2.03	0.23	79.32	1.31	280	152	4.52	0.82	3.53	4.61	9.4	9.9	51	291	3.75	1.35	1.41	5.74	4.84	0.27	0.19	2.63	17.6	30.6	0.94	0.94	11	2	2	2	2	1	1
1	0	82	8.59	4.12	18.95	3.54	0.8	0.43	127.78	6.37	184	81	2.68	0.62	1.44	9.17	11.33	180.7	13	319	2.4	0.75	1.14	3.67	4.81	4.7	1.72	8.23	16.5	27.5	1	1	11.7	1	1	2	1	8	2
1	1	73	40.2	0.71	7.96	2.68	3.16	0.19	76.62	1.86	154	141	4.5	0.39	2.01	3.74	6.4	2.698	18	486	2.49	0.83	2.3	4.37	6.63	12.92	4.72	3.22	17.6	26.4	1.08	1.08	12.6	2	2	2	1	2	1
1	1	87	72.5	0.97	16.43	4.72	1.012	0.75	433.33	12.39	156	173	5.83	0.27	0.36	4.46	5.13	0.5	16	317	3.45	1.8	1.32	5.86	11.12	1.47	0.44	2.86	19	24.4	0.9	0.91	10.6	1	1	2	1	14	2
0	1	69	74.6	1.16	9.25	2.62	8.01	0.34	216.56	3.59	353	127	4.72	0.56	1.63	5.85	8.35	13.7	18	269	1.71	1.54	1.43	3.9	11.7	13.37	5.15	3.45	15.7	29.5	1.1	1.09	12.8	2	2	1	1	4	1
0	0	59	82.9	1.11	9.21	2.72	2.56	0.14	169.86	3.93	248	134	4.47	0.21	1.46	5.74	7.43	2.2	18.67	294	2.4356	1.3644	1.6947	4.8215	9.29	0	0.29	2.48	17.4	25.2	0.93	0.93	10.9	2	2	2	2	4	3
0	1	58	78.7831	1.0473	13.21	4.8	2.18	0.25	99.4	1.77	165	156	5.17	0.41	1.66	2.93	5.2	1	10	372	3.28	0.82	1.54	4.81	16.08	0.94	0.19	3.13	17.8	27.5	0.9	0.91	10.6	2	2	1	2	4	3
1	0	56	67.552	1.1289	8.376	2.7773	6.48984	0.12	116.36	1.14	320	135	4.61	0.33	2.75	3.13	6.33	1.5	9	149	4.55	1.5	2.73	7.28	9.15	16.63	7.06	1.13	19.7	19.8	0.81	0.81	9.5	2	2	1	2	0	5
0	1	72	73.2802	1.0602	9.1101	2.7142	3.14194	3.33	149.33	4.17	224	156	5.06	0.45	1.5	6.26	8.46	0.8	15.29	286	1.41	0.89	0.79	2.64	6.11	2.6	0.72	3.41	17.7	24.9	0.95	0.89	11.9	2	1	1	1	7	1
1	1	96	7.92	0.91	7.92	2.4	1.41	0.42	99.11	1.99	222	106	3.47	0.95	2.24	4.45	7.89	1	20.51	301	2.31	1.5	0.85	4.306	16.88	2.41	1.03	2.13	18.3	28	1.01	1.01	11.8	2	2	1	1	1	1
0	0	72	61.4	1.02	8.12	2.34	3.43	0.2	150.58	2.45	259	118	3.9	0.34	1.72	4.22	6.5	2.6	15	305	3.1	0.88	3.33	5.49	4.78	0.8	0.64	3.62	16.8	29.2	0.98	0.98	11.5	1	2	1	1	6	1
0	0	92	53.1	0.86	7.1	2.41	5.84	0.17	68.65	1.56	173	159	5.18	0.43	2.52	3.94	7.01	1.816	16	278	3.21	1.2	3.05	5.8	11.2	2.41	0.45	1.88	18.2	26.4	1.02	1.02	11.9	2	1	1	1	6	5
0	0	57	65.6	0.86	8.56	2.93	1.33	0.31	150.78	1.88	291	153	4.85	0.6	1.93	3.63	6.26	2.6	12.45	292.63	2.01	1.3	0.86	3.7	5.1324	1.6232	0.4074	2.8339	17.283	27.238	0.9507	0.9498	11.099	2	2	2	2	5	3
0	0	66	74.1	0.92	9.16	2.44	3.18	0.31	185.71	2.83	221	152	4.74	0.37	1.19	3.37	5.11	0.4	17	260	3.56	1.33	0.9	5.39	4.62	1.34	0.32	2.58	16.6	27.5	1.01	1.01	11.8	2	2	2	2	7	1
1	1	61	67.4413	1.0535	8.3315	2.6945	2.72965	2.49	177.78	4.44	208	148	4.89	0.47	1.17	5.2	6.96	3.897	16	196	2.25	0.87	1.05	3.6	3.72	0.76	1.74	3.38	18.3	24.9	0.93	1.01	10.7	2	1	2	2	4	3
1	1	80	51.2	1.13	7.72	3.11	7.11	0.62	212.82	7.99	166	105	3.8	0.48	0.78	6.23	7.52	5.3	20.86	460	1.33	1.5	0.57	3.09	5.28	4.2	1.19	2.65	16.7	24.9	0.99	0.99	11.6	2	2	2	2	6	5
0	1	61	67.2991	1.0233	8.4868	2.6968	2.60834	0.18	102.19	1.36	280	149	4.71	0.49	2.74	3.74	7.08	0.5	11.79	283.1	2.481	1.3954	1.3391	5.1334	6.7395	0.44	0.2	3.52	17.8	28	0.96	0.96	11.2	2	2	1	1	3	5
1	0	82	58.3	0.98	7.66	2.06	7.72	0.3	152.48	4.72	215	112	3.96	0.43	1.41	6.66	8.63	9.5	20.22	351	1.49	1.3	1.35	3.4	7.1	40.55	15.3	3.29	15.1	26.8	1	1	11.7	2	2	2	2	10	3
1	1	71	88.7	1.19	9.88	3.06	3.59	0.6	375.47	14.43	199	164	5.36	0.32	0.53	7.65	8.52	1	11	219	4.38	1.29	1.03	6.14	8.33	1.88	0.42	3.52	17.3	23.8	0.92	0.92	10.8	2	2	2	1	1	5
1	0	87	70.8166	1.0357	8.7106	2.6911	2.83379	1.33	335	13.85	134	130	4.34	0.53	0.4	5.54	6.48	16.6	17.16	262	4.94	1.1	1.13	6.55	8.13	4.2	0.7	3.42	15.3	31.4	1.08	1.08	12.6	2	2	2	2	18	5
0	0	95	96.2	1	9.85	2.75	2.7	0.49	144.83	3.28	168	124	3.65	0.57	1.16	3.8	6.03	4.8	17.74	375	1.67	1.3	1.67	3	7.82	0.8	0.31	2.9	16.9	28.3	1.11	1.1	12.9	1	2	2	1	3	4
1	1	67	68.2522	1.0818	8.4097	2.6946	2.95273	0.44	285.19	5.3	308	136	4.52	0.48	1.08	5.72	7.61	13.8	15	334	2.85	1.36	3.7	5.27	21.61	1.6	0.33	4.48	17.7	25.9	0.88	0.88	10.3	2	2	1	1	9	5
1	1	60	101.5	1.07	16.12	4.64	1.408	1.08	288.46	23.08	150	150	4.55	0.56	0.52	12	13.11	0.5	15	234	2.05	1.32	1.26	3.88	4.85	0.92	0.34	2.34	18.3	23.1	0.96	0.96	11.2	2	2	2	2	22	2
0	0	78	7.5	1.04	14.2678	4.73	4.01	0.29	164.58	3.31	158	132	4.03	0.28	0.96	3.18	4.49	5	5	276.02	2.4589	1.3926	1.3561	5.1326	5.23	1.6	0.25	2.68	19.3	36.1	2.23	2.18	25.5	1	1	2	1	2	5
1	1	56	53.9	1.12	7.55	3.16	1.94	0.23	170.74	1.99	321	125	3.82	0.43	1.88	3.75	6.27	2.81	23	317	2.49	1.46	2.56	4.83	7.16	1.07	0.22	2.9	17.7	24.9	0.86	0.86	10.1	2	2	1	1	24	5
0	1	42	64.0232	1.0818	8.1408	2.7549	4.23245	0.22	113.51	2.3	210	152	5.28	0.41	1.85	4.26	7.11	0.2	17	206	2.78	0.91	1.98	4.58	6.16	1.24	0.19	1.97	17.1	30.4	0.96	0.96	11.2	2	2	1	2	4	5
1	1	77	75.6	1.24	18.2	4.46	1.333	0.31	299.22	2.28	386	118	4.05	0.4	1.29	2.94	4.64	0.9	22	349	5.42	1.15	1.14	7.08	6.73	2.91	0.94	4.9	16.3	26.7	0.95	0.95	11.1	2	2	2	2	4	3
0	0	55	40.2	0.71	7.96	2.68	3.16	0.45	139.18	4.11	135	120	4.13	0.44	0.97	3.99	5.45	3.4	11.85	276.56	2.4452	1.3279	1.3356	4.3624	7.133	1.7	0.25	2.61	16.9	25.1	0.98	0.98	11.5	2	1	1	1	5	4
1	1	57	63.5	0.91	8.2	2.33	1.75	0.22	114.43	3.22	230	163	4.5	0.44	2.01	6.47	9.01	1.5	82	442	1.97	1.17	3.19	4.59	4.9	0.8	0.23	2.27	18.1	26.8	0.9	0.91	10.6	2	2	2	1	1	1
0	1	63	73.4	1.39	9.88	2.86	5.22	10.67	65.1	1.29	125	138	4.98	0.18	1.92	2.47	5.68	4.475	13	348	1.59	1.8	0.91	3.8	8.84	1.6	4.41	3.54	17.8	26.4	1.08	1.02	10.4	2	1	1	2	5	1
0	1	85	64.4	1.12	8.89	2.81	2.54	0.18	88.83	1.3	175	133	4.16	0.36	1.97	2.56	5.27	0.6	13	343	1.55	1.23	1.38	3.64	4.41	1.34	0.19	1.66	18.4	29.9	0.96	0.97	11.3	2	2	2	1	6	5
0	1	73	73.4	0.66	9.9	2.25	1.93	0.36	217.54	3.09	248	135	4.59	0.41	1.14	3.52	5.23	14.8	16.12	312.9	2.5001	1.3072	1.1334	4.3285	5.8871	3.21	1.12	3.71	17.2	34.5	1.08	1.08	12.6	2	2	2	1	8	1
1	1	58	68.153	1.0795	8.3231	2.7013	2.9347	4.56	88.13	2.39	193	150	5.33	0.48	2.19	5.24	6.33	1	15	278	2.67	0.74	1.44	4.01	5.93	0.5	1.01	3.58	18.5	27.2	0.9	0.97	9.3	2	1	2	1	4	5
0	0	22	85.9	1.42	9.86	3.65	2.06	0.29	135.37	2.98	222	145	4.67	0.47	1.64	4.89	7.45	1.648	12.97	281.88	2.4228	1.3208	1.2297	4.4142	5.446	1.1354	0.3619	2.8805	17.592	26.791	0.9516	0.9492	11.101	2	2	2	2	8	5
1	0	80	67.7614	1.0573	8.9074	2.7707	3.37522	0.54	227.85	15.67	180	148	4.93	0.43	0.79	12.38	13.62	0.9	18.39	378	3.51	1.4	1.45	5.57	8.82	10.4	4.44	2.2	15.9	20.2	0.91	0.91	10.6	2	1	2	1	2	2
0	1	84	69.0318	1.0555	8.6546	2.7037	2.70105	0.59	281.71	7.8	231	140	4.37	0.48	0.82	6.4	7.92	10.5	10	216	3.08	1.65	0.93	5.15	5.33	3.39	0.81	4.3	16.5	28.6	0.92	0.92	10.8	1	2	2	1	7	3
0	0	85	81.5	1.12	8.98	2.4	2.7	0.09	141.06	3.52	213	148	4.89	0.13	1.51	5.32	6.96	2.708	13	475	2.02	1.3	1.23	3.87	6.11	3.09	0.82	3.59	17.7	23.7	0.9	0.91	10.6	1	1	2	2	8	2
0	1	88	82.1	1.02	9.97	2.79	2.51	0.31	54.73	2.08	133	129	4.19	0.76	2.43	5.05	8.49	5.2	31.27	508	0.48	1.8	1.37	2.9	5.71	4.28	1.01	3.22	20.6	36.5	1.21	1.21	14.1	1	1	2	2	13	2
0	0	59	67.167	1.0576	8.4768	2.7481	3.24195	5.85	86.25	3.03	207	126	4.23	0.41	2.4	7.27	5.61	1.2	15	260	2.39	1.19	1.22	4.14	5.28	1.13	0.28	3.58	17.2	25.5	0.96	1.01	13.2	2	2	1	2	5	5
0	1	82	54.7	0.96	8.34	3	15.9	0.17	148.94	1.35	210	149	4.81	0.24	1.41	1.9	3.66	2.282	8	235	2.61	1.75	1.59	5.52	12.94	1.07	0.31	2.31	18	27.1	0.94	0.94	11	1	2	1	1	7	4
0	1	85	58.9	0.89	8.94	2.32	2.31	0.3	191.8	3.19	234	155	4.87	0.36	1.22	3.89	5.67	0.9	9	251	4.93	1.23	1.38	6.79	7.88	1.6	0.34	3.9	16	26.6	0.9	0.91	10.6	1	2	1	1	5	5
0	1	63	55.9	1.03	8.38	2.75	2.95	0.19	91.36	1.3	222	136	4.3	0.47	2.43	3.16	6.28	1	12	344	2.02	0.8	5.71	5.42	4.83	1.07	0.41	2.84	17.5	27.2	0.94	0.94	11	2	2	2	1	4	3
1	1	43	9.87	1.93	13.36	7.05	0.007	0.35	94.9	2.04	242	139	4.82	0.88	2.55	5.21	8.9	0.4	10	292	5.54	0.62	1.16	6.69	5.18	0.8	0.18	2.13	17.6	26	1.03	1.03	12	1	2	2	1	9	5
0	1	50	76.3035	1.2399	9.3369	2.7694	3.16116	0.27	119.23	3.03	217	174	5.31	0.5	1.82	5.52	7.97	1.7	14.8	351	2.76	1.2	1.62	4.7	7.69	0.53	0.19	2.09	17.5	26.3	0.86	0.86	10.1	2	2	2	1	12	4
1	1	86	66.5	0.99	7.69	2.57	7.71	0.56	284.44	4.08	256	130	4.24	0.5	0.9	3.67	5.68	7.3	22	236	3.57	1.01	1.38	5.21	6.23	4.55	1.46	4.01	17.2	29.2	0.97	0.97	11.4	1	2	1	1	2	1
1	0	56	76.9	1.36	8.54	2.99	1.41	0.24	102.75	6.35	112	116	3.69	0.26	1.09	6.92	8.29	3.213	7	237	2.45	1.28	3.08	5.13	13.19	2.07	1.92	1.91	17.9	22.8	0.86	0.86	10.1	2	2	1	1	4	3
0	1	66	71.7562	1.0776	8.6166	2.7181	2.49954	0.42	151.11	3.4	204	161	4.72	0.57	1.35	4.59	6.64	2.7	15	260	2.39	1.19	1.22	4.14	5.28	0.94	0.28	3.59	17.7	25	0.89	0.89	10.4	2	2	2	1	4	5
0	0	78	55.5	1.06	8.46	2.58	2.9	0.19	89.47	1.65	255	152	5.25	0.54	2.85	4.69	8.32	1.4	17	169	3.51	1.22	1.56	5.44	3.83	1.28	0.34	3.19	17.2	23.3	0.87	0.87	10.2	2	2	2	2	3	1
0	1	56	56.6	1.09	8.47	2.69	8.6	0.2	65.82	1.52	181	145	4.65	0.56	2.75	4.18	7.64	3.4	10	331	2.36	0.94	1.79	3.75	4.01	1.34	0.46	3.29	17.6	28.8	0.89	0.89	10.4	2	2	2	1	4	5
0	1	55	77.1	1.1	9.07	2.73	2.74	0.24	116.74	2.52	265	163	5.14	0.54	2.27	5.72	8.71	1.6	26.53	485	1.82	1.1	2.38	4	7.56	0.53	0.2	2.35	133.3	36.5	1.12	1.12	13.1	1	1	2	1	2	2
0	0	69	72.0012	1.0267	9.0212	2.8006	2.43038	2.55	231.65	5.86	183	143	4.78	0.31	0.79	4.63	9.85	27.4	12	291	1.4	1.06	1.51	3.32	4.59	7.02	0.3	2.71	16.7	27.6	1.01	0.99	10.1	2	1	1	2	11	5
0	1	59	69.4	1.1	8.68	2.94	1.72	0.22	171.77	1.74	359	147	4.88	0.45	2.09	3.64	6.38	2.938	9	303	3.04	1.31	1	4.8	4.67	0.53	0.19	5.06	16.4	27.3	0.92	0.92	10.8	2	2	2	2	5	1
0	1	72	85	0.76	22.68	4.74	0.43	0.28	184.17	3.63	221	156	4.88	0.33	1.2	4.36	5.96	1.4	14.37	289.19	2.4345	1.4622	1.4508	4.9569	6.5204	0.56	0.27	1.73	19.6	26.1	0.89	0.9	10.5	1	2	2	2	4	5
0	0	69	7.52	0.37	3.38	0.94	99	0.22	95.65	2.5	176	116	3.59	0.4	1.84	4.6	7.54	3.1	27.46	499	3.36	1.2	1.62	5.3	7.69	4.01	1.27	3.02	18	33.9	1.21	1.21	14.1	1	2	1	1	12	5
0	1	84	7.19	1	15.2555	3.7	1.38	0.34	124.7	3.4	207	135	4.21	0.56	1.66	5.64	7.91	4.9	12	271	2.46	0.73	0.99	3.64	4.79	1.34	0.25	1.8	237	43	1.34	1.33	15.6	1	1	2	2	5	5
1	1	57	66.952	1.0493	8.4122	2.7161	3.44754	0.2	89.1	1.64	188	140	4.97	0.43	2.11	3.47	6.11	0.5	13	406	2.04	0.94	1.31	3.82	3.99	1.213	0.377	2.9232	17.538	27.975	0.9528	0.9499	11.1	2	2	2	1	10	5
0	0	62	70.6312	1.0616	8.7404	2.6655	3.15316	0.15	103.62	1.35	229	158	4.91	0.34	2.21	2.99	5.62	0.5	11	434	2.4	1.28	1.27	4.33	4.53	1.07	0.25	2.73	18.7	29.8	0.97	0.97	11.4	2	2	2	2	3	5
0	1	79	72.2845	1.0407	8.8219	2.6601	3.07619	2.17	130.47	4.74	167	153	4.95	0.59	1.28	6.07	9.88	2.1	17	185	2.1	1.02	1.42	3.77	14.92	2.91	1.86	3.71	18.7	26.2	0.89	0.95	10.8	1	2	2	2	17	5
0	0	67	67.6216	1.0844	8.6445	2.8321	3.75621	0.14	85.97	1.33	190	120	4.11	0.3	2.21	2.93	5.48	1.1	11.55	275.71	2.4402	1.4162	1.4264	4.9511	5.3796	1.1	0.21	2.67	19	27.1	0.87	0.87	10.2	2	2	2	1	7	3
0	1	47	75.3	1.68	9.29	3.58	4.07	0.18	92.82	2.02	194	127	4.48	0.38	2.09	4.23	6.82	1.9	12	417	1.61	0.89	1.76	3.29	4.54	0.53	0.21	1.88	18	33.6	0.98	0.98	11.5	2	2	2	2	4	1
0	1	74	66.0227	1.0562	8.2483	2.7267	2.88791	2.66	113.26	2.72	205	140	4.37	0.68	1.81	4.93	7.92	10.5	8	225	2.06	1.23	1.64	4.03	4.41	0.56	0.19	3.49	19.2	25.9	0.93	0.89	11.8	1	1	1	2	3	4
0	1	48	66.1262	1.0394	8.1911	2.7334	2.92685	2.64	142.93	4.12	283	145	4.33	0.75	1.98	8.16	5.96	2.1	13.78	295	1.99	1	1.5	3.67	5.65	1.5	0.51	4.46	18.8	29.2	0.98	0.95	11.9	1	1	1	2	5	5
0	1	54	50.5	1.19	6.96	3.03	1.41	0.17	56.86	1.29	170	146	4.8	0.5	2.99	3.85	7.75	0.4	14	541	2.77	0.93	2.23	4.71	7.98	0	0.2	1.77	18.7	26.3	0.83	0.84	9.8	1	2	1	1	2	5
0	1	69	79.4	1.38	9.58	3.37	1.89	0.55	212.2	4.29	261	130	4.4	0.68	1.23	5.28	7.35	4.217	12	263	2.7	1.06	1.5	4.44	4.27	1.34	0.61	3.8	16.6	27.6	1.04	1.03	12.1	1	2	2	2	2	3
1	1	90	88	0.96	8.47	2.7	3.33	0.43	145.76	2.29	172	117	4.01	0.51	1.18	2.7	4.65	1.2	27	372	1.26	0.63	1.62	2.63	6.5	4.52	1.25	2.34	18.7	23.9	0.95	0.95	11.1	1	2	1	1	6	5
1	1	77	70.5422	1.0282	8.825	2.8291	3.16913	0.28	230.28	2.48	251	141	4.54	0.31	1.09	2.7	4.56	2.3	13.41	282.44	2.4979	1.3022	1.088	4.2922	5.6324	1.2008	0.3902	2.8495	17.578	27.113	0.9501	0.9498	11.099	2	2	2	2	8	3
0	0	62	7.64	0.99	15.4073	5.8	2.54	0.22	70.05	1.87	138	187	6.04	0.43	1.97	3.69	6.42	4.7	7	374	4.02	0.88	1.56	5.61	6.61	1.6	0.31	1.6	17.8	31.2	0.91	0.91	10.7	1	1	2	1	4	4
1	1	59	71.9	1.23	8.55	3.28	1.12	2.61	157.45	7.98	148	147	4.91	0.36	0.94	7.5	7.85	2.8	17	313.05	0.93	0.98	0.98	2.36	6.2868	5.2581	0.18	4.71	16.6	33.5	0.98	1.0157	8.7	1	1	2	2	1	3
0	0	69	83.4	0.72	10.2	1.32	26.6	0.23	164.91	3.72	188	169	5.22	0.26	1.14	4.24	5.69	3	22.22	340.52	2.4315	1.3953	1.2838	5.1691	7.7863	2.3	0.65	3.18	16.8	23.4	0.84	0.84	9.8	2	1	2	1	5	2
0	0	22	8.21	51.4	17.49	6.29	2.46	0.29	135.37	2.98	222	145	4.67	0.47	1.64	4.89	7.45	2.1	13.37	264.14	3.8651	1.3604	1.1607	5.7992	5.4158	1.275	0.3637	2.9374	17.97	26.385	0.9499	0.9492	11.091	2	2	2	2	3	5
0	1	58	64.5641	1.1093	8.1601	2.8037	3.18602	0.23	111.98	2.73	243	134	4.5	0.5	2.17	5.93	8.72	0.5	11.46	174	4.04	1.37	1.63	6.15	5.66	1.51	0.29	2.15	19.5	21.1	0.88	0.88	10.3	2	2	2	1	4	5
0	0	63	63.3	0.92	8.77	2.48	1.19	0.26	90.7	1.92	156	124	3.91	0.44	1.72	3.31	5.52	0.5	17.26	276	1.71	1.3	0.64	3.3	5.56	2.41	0.97	1.94	16.5	28.6	0.97	0.97	11.3	2	2	2	1	4	4
0	0	88	0.65	0.61	14.769	3.68	57.5	1.5195	122.09	2.5179	207.91	159.75	5.2347	0.7385	1.7167	4.5344	6.7745	6.971	8	260	7.13	0.71	8.3	5.84	6.43	3.48	1	2.58	18.2	26.1	1.11	1.1	12.9	2	1	2	2	1	5
0	0	89	69.161	1.0376	8.6728	2.8152	5.14979	0.31	139.36	1.17	131	119	3.91	0.29	0.94	1.1	2.4	3.482	17	260	2.28	0.77	1.4	3.88	7.46	2.14	0.66	2.78	17.4	25.1	1.01	1.01	11.8	2	2	2	1	4	5
0	1	64	60.4	1.06	8.94	2.72	1.97	0.26	85.25	1.96	156	135	4.73	0.47	1.83	3.58	5.94	1.8	9	267	1.87	0.64	2.28	3.48	9.31	1.34	0.25	2.41	17.3	27.8	0.93	0.93	10.9	2	2	1	2	1	3
0	0	82	76.2	0.89	10.3	3.04	0.736	0.57	253.26	5.22	233	118	3.94	0.52	0.92	4.8	6.43	5.8	15	226	0.97	1.15	1.03	3.04	3.47	3.21	0.91	2.44	15.6	31.9	1.04	1.03	12.1	2	1	1	1	4	2
1	1	83	50.5	1.19	6.96	3.03	1.41	0.37	303.48	4.75	349	118	3.8	0.43	1.15	5.46	7.07	12.2	20.73	359	3.46	1.2	0.96	5.1	6.89	12.63	3.64	4.75	16.4	28	1	1	11.7	2	1	1	1	12	5
1	1	56	7.2558	4.261	8.4375	2.677	2.92865	1.08	198.61	8.03	286	142	4.09	1.55	1.44	11.57	14.64	89.6	14.86	295	1.99	1	1.5	3.67	5.65	4	0.51	4.28	20.5	29.4	0.93	0.93	10.9	1	2	2	1	11	5
0	0	95	96.2	1	9.85	2.75	2.7	0.49	144.83	3.28	168	124	3.65	0.57	1.16	3.8	6.03	4.8	19.24	375	0.94	1.3	1.67	3	7.82	0.8	0.31	2.9	16.9	28.3	1.11	1.1	12.9	1	2	2	1	5	5
0	0	70	63.4	1.13	2.74	2.74	8.95	0.16	87.61	1.56	191	140	4.34	0.35	2.18	3.39	5.99	2.2	11	378	2.54	1.05	3.06	4.65	4.78	2.67	0.6	2.9	17.1	28.1	0.92	0.92	10.8	2	2	2	1	6	5
0	1	65	63.2	0.79	8.01	2.21	4.56	0.21	108.81	2.37	173	107	3.45	0.33	1.59	3.77	4.83	0.4	27.05	482	0.96	1	0.96	2.4	7.75	1.07	0.28	3.35	17.8	26.6	1.09	1.09	12.9	1	2	1	1	3	3
0	0	67	46.7	0.88	7	2.39	0.65	0.23	101.05	1.98	193	131	4.3	0.44	1.91	3.78	6.39	1.2	26	468	1.8	0.85	2.75	3.55	8.07	0.8	0.45	2.9	18.2	26.1	0.96	0.97	11.3	2	2	1	1	5	5
0	1	52	89	0.82	10.9	2.77	3.24	1.75	152.9	5.88	211	142	4.62	0.79	1.38	8.12	5.19	0.4	12	390	2.31	0.87	2.33	4.24	5.98	0.8	0.23	2.89	19.2	31.8	0.88	0.89	11.7	2	1	1	2	12	3
0	0	72	53.1	0.97	8.25	2.64	1.08	0.31	127.88	1.28	211	161	5.03	0.51	1.65	2.11	4.39	1.2	12	221	3.51	1.75	1.48	5.93	9.9	3.74	0.83	2.58	17.8	26.7	1.03	1.03	12	1	2	1	1	1	3
0	1	75	45.12	0.92	13.35	5.2	2.691	0.18	111.58	2.08	212	137	4.67	0.35	1.9	3.95	6.37	0.5	11.1	266	2.25	1.2	3.12	4.87	5.72	1.7	0.43	1.8	17.6	26.6	0.82	0.83	9.7	2	2	2	2	4	3
0	1	75	69.4463	1.0475	8.747	2.7654	3.23668	0.2915	122.94	2.6077	205.87	138.93	4.5045	0.5138	1.6922	4.4751	6.9074	1.323	15	216	1.99	1.15	0.7	3.46	4.56	0.4	0.38	1.78	17.4	28	0.87	0.87	10.2	2	2	2	2	5	3
0	0	55	4.55	8.97	15.41	4.75	3.09	0.27	92.09	1.96	128	137	4.19	0.37	1.39	2.72	4.67	1.7	16	273	2.15	0.91	0.65	3.36	3.68	1.69	0.23	2.72	16.7	30.9	0.95	0.95	11.1	2	2	2	1	6	3
1	0	71	51.8	0.88	6.51	2.42	4.64	0.29	170.54	2.67	191	132	4.37	0.33	1.12	2.99	4.51	0.5	18	188	2.02	1.49	0.89	3.91	5.37	1.13	0.19	2.34	17.3	26.4	0.93	0.93	10.9	2	2	2	2	16	5
0	1	83	79.9	1.04	8.72	2.62	2.46	0.39	113.97	3.34	155	129	4.28	0.53	1.36	4.54	6.58	4.8	25.37	405	1.27	0.6	1.83	2.7	14.35	2.94	0.66	2.68	17.9	26.4	0.97	0.97	11.4	1	2	1	1	7	5
